# Supplementary material for: Disease burden of diabetes, diabetic retinopathy and their future projections in the UK: cross-sectional analyses of a primary care database
Source: PubMed Central journal article supplement — BMJ Open. 2021 Jul 12;11(7):e050058. doi: 10.1136/bmjopen-2021-050058 (PMC8276304; doi:10.1136/bmjopen-2021-050058), 2021-07-12
Supplement: bmjopen-2021-050058.draft_revisions.pdf [file bmjopen-2021-050058.draft_revisions.pdf]

# BMJ Open

BMJ Open is committed to open peer review. As part of this commitment we make the peer review history of every article we publish publicly available.

When an article is published we post the peer reviewers' comments and the authors' responses online. We also post the versions of the paper that were used during peer review. These are the versions that the peer review comments apply to.

The versions of the paper that follow are the versions that were submitted during the peer review process. They are not the versions of record or the final published versions. They should not be cited or distributed as the published version of this manuscript.

BMJ Open is an open access journal and the full, final, typeset and author-corrected version of record of the manuscript is available on our site with no access controls, subscription charges or pay-per-view fees (<http://bmjopen.bmj.com>).

If you have any questions on BMJ Open's open peer review process please email [info.bmjopen@bmj.com](mailto:info.bmjopen@bmj.com)

# BMJ Open

## Disease burden of diabetes, diabetic retinopathy and their future projections

|                               |                                                                                                                                                                                                                                                                                                                                                                                                                                                                                                                                                                                                                             |
|-------------------------------|-----------------------------------------------------------------------------------------------------------------------------------------------------------------------------------------------------------------------------------------------------------------------------------------------------------------------------------------------------------------------------------------------------------------------------------------------------------------------------------------------------------------------------------------------------------------------------------------------------------------------------|
| Journal:                      | <i>BMJ Open</i>                                                                                                                                                                                                                                                                                                                                                                                                                                                                                                                                                                                                             |
| Manuscript ID                 | bmjopen-2021-050058                                                                                                                                                                                                                                                                                                                                                                                                                                                                                                                                                                                                         |
| Article Type:                 | Original research                                                                                                                                                                                                                                                                                                                                                                                                                                                                                                                                                                                                           |
| Date Submitted by the Author: | 09-Feb-2021                                                                                                                                                                                                                                                                                                                                                                                                                                                                                                                                                                                                                 |
| Complete List of Authors:     | haider, sajjad; University of Birmingham, Institute Of Applied Health Research<br>Thayakaran, Rasiah; University of Birmingham, Institute of Applied Health Research<br>Subramanian, Anuradhaa; University of Birmingham, Institute Of Applied Health Research<br>Toulis, Konstantinos A; University of Birmingham, Institute Of Applied Health Research<br>Moore, David; University of Birmingham, Institute Of Applied Health Research<br>Price, Malcolm; University of Birmingham, Institute Of Applied Health Research<br>Nirantharakumar, Krishnarajah; University of Birmingham, Institute Of Applied Health Research |
| Keywords:                     | Diabetic retinopathy < DIABETES & ENDOCRINOLOGY, OPHTHALMOLOGY, EPIDEMIOLOGY, General diabetes < DIABETES & ENDOCRINOLOGY, Medical retina < OPHTHALMOLOGY                                                                                                                                                                                                                                                                                                                                                                                                                                                                   |
|                               |                                                                                                                                                                                                                                                                                                                                                                                                                                                                                                                                                                                                                             |

SCHOLARONE™  
Manuscripts

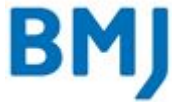

I, the Submitting Author has the right to grant and does grant on behalf of all authors of the Work (as defined in the below author licence), an exclusive licence and/or a non-exclusive licence for contributions from authors who are: i) UK Crown employees; ii) where BMJ has agreed a CC-BY licence shall apply, and/or iii) in accordance with the terms applicable for US Federal Government officers or employees acting as part of their official duties; on a worldwide, perpetual, irrevocable, royalty-free basis to BMJ Publishing Group Ltd ("BMJ") its licensees and where the relevant Journal is co-owned by BMJ to the co-owners of the Journal, to publish the Work in this journal and any other BMJ products and to exploit all rights, as set out in our [licence](#).

The Submitting Author accepts and understands that any supply made under these terms is made by BMJ to the Submitting Author unless you are acting as an employee on behalf of your employer or a postgraduate student of an affiliated institution which is paying any applicable article publishing charge ("APC") for Open Access articles. Where the Submitting Author wishes to make the Work available on an Open Access basis (and intends to pay the relevant APC), the terms of reuse of such Open Access shall be governed by a Creative Commons licence – details of these licences and which [Creative Commons](#) licence will apply to this Work are set out in our licence referred to above.

Other than as permitted in any relevant BMJ Author's Self Archiving Policies, I confirm this Work has not been accepted for publication elsewhere, is not being considered for publication elsewhere and does not duplicate material already published. I confirm all authors consent to publication of this Work and authorise the granting of this licence.

1

## **Disease burden of diabetes, diabetic retinopathy and their future projections**

Sajjad Haider<sup>1</sup>, Rasiah Thayakaran<sup>1</sup>, Anuradhaa Subramanian<sup>1</sup>, Konstantinos A Toulis<sup>1</sup>, David Moore<sup>\*2</sup>, Malcolm James Price<sup>\*2</sup>, Krishnarajah Nirantharakumar<sup>\*2</sup>

1. Institute of Applied Health Research, University of Birmingham
2. \*Joint Senior Authors Institute of Applied Health Research, University of Birmingham, Birmingham, United Kingdom

### **Joint Corresponding authors:**

Sajjad Haider, Postdoctoral Researcher, Institute of Applied Health Research, University of Birmingham, Birmingham, United Kingdom

E mail: [S.Haider.2@bham.ac.uk](mailto:S.Haider.2@bham.ac.uk)

Krishnarajah Nirantharakumar, Institute of Applied Health Research, University of Birmingham, Birmingham, United Kingdom

E mail: [K.Nirantharan@bham.ac.uk](mailto:K.Nirantharan@bham.ac.uk)

**The authors have no competing interest to disclose.**

### **Key words**

Diabetes Mellitus, Diabetic Retinopathy, Current Disease Burden, Future Projections

2

## Abstract

### Objectives

To estimate the current disease burden, trends and future projections for Diabetes Mellitus (DM) and Diabetic Retinopathy in IQVIA Medical Research Data (IMRD).

### Participants / Design / Setting

We performed a cross-sectional study of patients aged 12 and above to determine the prevalence of Diabetes Mellitus and Diabetic Retinopathy from IMRD database (primary care database) in January 2017. We also carried out a series of cross-sectional studies to look into prevalence trends, and then applied a double exponential smoothing model to forecast the future burden of Diabetes Mellitus and Diabetic Retinopathy in UK.

### Results

The crude Diabetes Mellitus or Diabetic Retinopathy prevalence in 2017 was 5.2%. The Diabetic Retinopathy, Sight Threatening Retinopathy (STR) and Diabetic Maculopathy prevalence figures in 2017 were 33.78%, 12.28% and 7.86% respectively in our IMRD cross-sectional study. There are upward trends in the prevalence of Diabetes Mellitus, Diabetic Retinopathy, and Sight-threatening retinopathy, most marked and accelerating in Sight-threatening retinopathy in type 1 Diabetes Mellitus (T1DM) but slowing in type 2 Diabetes Mellitus (T2DM), and in the overall prevalence of Diabetic Retinopathy.

### Conclusion

Our results suggest differential rising trends in the prevalence of Diabetes Mellitus and diabetic retinopathy. Preventive strategies, as well as treatment services

3

1  
2  
3  
4 planning, can be based on these projected prevalence estimates. Improvements that  
5  
6 are necessary for the optimisation of care pathways, and preparations to meet  
7  
8 demand and capacity challenges, can also be based on this information. The  
9  
10 limitations of the study can be overcome by a future collaborative study linking  
11  
12 Diabetic Retinopathy (DR) screening and hospital eye services data.  
13  
14  
15  
16  
17  
18

#### 19 **Article Summary: Strengths and limitations of this study**

- 21 • This is an up to date study to give DM and Diabetic Retinopathy  
22 prevalence trends from 1998 to 2018.
- 23 • This study forecasts the future Diabetic Retinopathy disease burden up  
24 to 2030 to enable preparation for impending challenges.
- 25 • Current prevalence of age 12 and over, diagnosed DM, DR, STR,  
26 Diabetic Macular Oedema disease and treatment burden in United  
27 Kingdom  
28
- 29 • This study has not however been adjusted for the risk factors for the  
30 incidence/prevalence of Diabetes Mellitus or Diabetic Retinopathy
- 31 • A possible impact of coding errors and subjectivity in documentation  
32 cannot be precluded  
33  
34  
35  
36  
37  
38  
39  
40  
41  
42  
43  
44  
45  
46  
47  
48  
49  
50  
51  
52  
53  
54  
55  
56  
57  
58  
59  
60

4

## Introduction

DR is the fourth most common cause of blindness and visual impairment in high-income countries (1). Services are overburdened and optimisation requires accurate estimates of disease and the expected treatment burden (2). A recent systematic review of studies estimating the incidence of DR (3) highlighted the paucity of contemporary evidence from developed countries on the disease burden and recommended that estimates should be based on populations with Diabetes Mellitus (DM) rather than the general population so as not to dilute the estimates. A recent attempt to forecast the UK-wide disease burden of DR was hindered by the need for reliable data (4).

Previous studies have been conducted on the prevalence of DR (5-9), with the most recent UK-wide study being performed in 2014 based on Clinical Practice Research Datalink (CPRD). Two of these studies also explored trends in DR incidence and prevalence (6, 9). A significant amount of heterogeneity in the populations studied, the classification of DR, and the definition of its presence and severity was present in these studies. Studies of the forecasts of the future disease burden of DR would be useful both for preparing health care delivery systems for the future, and in preventing blindness in patients with DM. There is a Europe wide forecast study with UK component based on pre 2009 data dealing with DR only (10). The disease burden estimate of DR will not be complete without a similar estimate for the diabetes burden. A UK wide upto date study dealing with DM, DR and STR is needed.

A previous study on future projections of DM in the United Kingdom was found to underestimate prevalence (11). Moreover, evidence suggests that the rate of

5

1  
2  
3  
4 increase is not constant or uniform across DM subtypes (namely T2DM and T1DM,  
5  
6 especially in children (12). The incidence rate of T1DM (pooled estimate of European  
7  
8 centres, UK included) in children is expected to continue to rise at a rate of 3.4% per  
9  
10 annum (13). Gonzalez et al (14) reported an increasing prevalence of DM for the 10  
11  
12 years up to 2005. Public Health England (PHE) figures are available for 2019, based  
13  
14 on the Quality Outcome Framework, except in Scotland where they are based on  
15  
16 Scottish Diabetes Survey (15). However, these figures are limited to those over 17  
17  
18 years old. We aimed to estimate recent trends in the disease burden of DM, and to  
19  
20 use this as a base on which to estimate the current disease burden for DR and STR  
21  
22 in the UK. We then wanted to design, train and validate a forecasting model to  
23  
24 support future projections of these disease burdens. Since DR screening is offered  
25  
26 after age 12 only, the population of interest to us was age 12 or over only.  
27  
28  
29  
30  
31

## 32 **Methods**

### 33 **Study design and data source**

34  
35  
36 To study the trend, and to forecast the future burden of diagnosed DM, DR and STR,  
37  
38 we used the IMRD database to conduct a series of yearly cross-sectional analyses  
39  
40 on the 1<sup>st</sup> of each year from 1998 to 2018. In addition, a detailed cross sectional  
41  
42 study was carried out on the 1<sup>st</sup> of January 2017 to estimate the prevalence of T1DM  
43  
44 and T2DM in the whole UK population, and of DR in patients with T1DM and T2DM.  
45  
46  
47  
48  
49  
50 IMRD is a large UK general practice electronic database containing anonymised  
51  
52 patient records from 787 general practices, with over 15 million patient records, of  
53  
54 which around 3.7 million are active at a given time point (6.2% of the UK population).  
55  
56  
57 IMRD provides information on demographics, lifestyle, diagnoses, and prescriptions,  
58  
59  
60



6

1  
2  
3  
4 and is quality checked (16). Based on the demographics distribution observed in  
5  
6 IMRD, it is considered generalizable to the UK population (17). IMRD has previously  
7  
8 been used and validated to estimate prevalence trends of DM and DR, and to identify  
9  
10 risk factors for DR (14, 18-21).  
11  
12  
13

### 14 **Study population**

15  
16 To ensure that only high quality data was included, and that all important covariates  
17  
18 were documented, general practices were eligible only if they showed acceptable  
19  
20 mortality rates one year before the cross-sectional study date (16), and had been  
21  
22 using the electronic medical record system for at least a year. Patients from eligible  
23  
24 general practices must have been registered with their practice for at least one year  
25  
26 and must be aged 12 years or above to be included in the study to match the  
27  
28 Diabetic Eye Screening Programme criteria (DESP). For estimation of the prevalence  
29  
30 of T1DM and T2DM, the whole registered population was included as the  
31  
32 denominator population (per 1000). For estimation of STR and DR prevalence,  
33  
34 patients with DM served as the denominator (per 100). Estimates are stratified by  
35  
36 type of diabetes. There was no patient and public involvement in this research  
37  
38 project.  
39  
40  
41  
42  
43  
44

### 45 **Case definition of diagnoses of DM and DR**

46  
47 Clinical diagnosis and symptoms in the IMRD database are recorded using the Read  
48  
49 code classification system (22). Read codes were selected using a rigorous seven  
50  
51 step process and selected search terms (Appendix 1, 2). Read codes are given in  
52  
53 Appendix 3. Patients with a Read code record of DM before the study entry date  
54  
55 were identified. Patients with a record of DM specified as type 1 were categorised as  
56  
57  
58  
59  
60

7

1  
2  
3  
4 type 1 if they had at least one prescription record for insulin and no record for any  
5 oral glucose-lowering medication other than metformin in the database. The  
6  
7 remaining patients with diabetes were categorized as type 2. Prevalence estimates  
8  
9 calculated were verified against PHE estimates of DM (23).

10  
11  
12  
13 The most severe DR Read code recorded before study entry was used to classify  
14 their DR or STR status. Stages of DR among those patients identified with DM were  
15 classified using the Royal College of Ophthalmology modified classification (24).  
16  
17 However, patients with a retinopathy record were stratified into mutually exclusive  
18 categories of 1) Pre-STR including no retinopathy and background retinopathy, 2)  
19 STR and 3) Retinopathy unspecified as either pre-STR (background retinopathy) or  
20 STR. Pre-STR was further categorized into mutually exclusive categories: 1) R0 or 2)  
21 R1. STR was further categorized into mutually exclusive categories of 1) STR based  
22 on diagnostic codes and 2) STR that needed treatment or resulted in vision loss.  
23  
24 Within STR we categorised pre-proliferative DR (R2) and proliferative DR (R3) as  
25 mutually exclusive groups. STR was further stratified into overlapping categories  
26 based on the presence of STR (R2/3) and maculopathy (M1). Treatment and vision  
27 loss codes included: (i) laser therapy, (ii) vitreous injection and other vitreous  
28 procedures, (iii) low vision or blindness.

### 46 **Time trend analysis and forecasting models**

47  
48  
49 A double exponential smoothing model was chosen to cover the level and trend, as  
50 this was yearly cross-sectional data with no seasonal / cyclical variation expected or  
51 observed (25) not unlike Adams et al published model (26). The IMRD serial cross-  
52 sectional data for the prevalence of DM and DR (STR and any retinopathy) were split  
53 into two portions - 1998 to 2013 (training data) and 2014 to 2018 (test data). The  
54  
55  
56  
57  
58  
59  
60

8

1  
2  
3  
4 model was fitted to the training data and then prediction was carried out from 2014 to  
5  
6 2018. This was then compared with the test data for validation. Thereafter, the yearly  
7  
8 prevalence of DR and STR were projected up to 2030 using the same model with  
9  
10 95% prediction intervals. This was done using the statistical software R (2019) (27).  
11  
12  
13 Prevalence rates were then converted into patient numbers, using projected  
14  
15 population figures from the Office of National Statistics (28).  
16  
17

### 18 **IMRD data analysis for annual prevalence of DM and DR.**

19  
20  
21 Prevalence trends between the two decades before and after 2008 were compared  
22  
23 for trend analysis. Patients identified as T1DM or T2DM on or before 1<sup>st</sup> of January in  
24  
25 each year analysed were identified as the numerators for calculating the prevalence  
26  
27 of T1DM and T2DM. The prevalence was estimated by dividing the numerator  
28  
29 population by the eligible registered population aged above 12 years (denominator)  
30  
31 on 1<sup>st</sup> of January for the corresponding year. Among these patients, those diagnosed  
32  
33 with any retinopathy and those with STR were numerators for calculating the  
34  
35 prevalence of DR and STR respectively. Prevalence estimates are provided for  
36  
37 patients with T1DM and T2DM separately with 95% confidence intervals A  
38  
39 description of patients aged 12 or above with a diagnosis of DM is also given for the  
40  
41 year 2017. Baseline characteristics such as age, and age at diagnosis of diabetes  
42  
43 were summarized as the mean (SD), and as frequency (percentage) for sex,  
44  
45 Townsend deprivation quintile and ethnicity. These characteristics were also reported  
46  
47 as stratified by type of DM. A detailed description of the proportion of DM patients  
48  
49 (T1DM and T2DM aged 12 or above) with DR in the year 2017 categorized by DR  
50  
51 severity is also presented.  
52  
53  
54  
55  
56  
57  
58  
59  
60

9

1  
2  
3  
4 Estimates from IMRD were compared to estimates obtained from data from UK  
5  
6 studies (5-7, 9, 30) for verification and comparison in Appendices 6 and 7.  
7  
8

### 9 **Ethical approvals:**

10  
11 The study protocols were submitted to both the Scientific Review Committee and the  
12  
13 Science, Technology, Engineering and Mathematics Ethical Review Committee at  
14  
15 the University of Birmingham for review and approval, which were granted. Consent  
16  
17 was not required.  
18  
19

### 20 **Results**

21  
22 Figure 1 gives the Patients flow and case selection algorithm. As of 1<sup>st</sup> January 2017,  
23  
24 2,813,916 people were eligible to be included in the primary cross-sectional analysis.  
25  
26 The demography characteristics of the sample are given in Table 1. The mean age of  
27  
28 patients with T1DM and T2DM as of 1<sup>st</sup> January 2017 was 42.5 (17.2) and 66.3  
29  
30 (13.0) respectively. The mean age at diagnosis of T1DM and T2DM were 21.4 (14.3)  
31  
32 and 57.0 (13.1) respectively. Nearly 80% and 55% of patients respectively had their  
33  
34 Townsend deprivation and ethnicity recorded in IMRD.  
35  
36  
37  
38  
39  
40

### 41 **Prevalence trends**

42  
43 The results in figures 2 and 3 show an almost a global upward trend in the  
44  
45 prevalence of both types of diabetes (T1DM and T2DM) and in DR (all types of DR /  
46  
47 STR). The highest rise was seen in STR in those with T1DM (3.7 times increase in  
48  
49 two decades). The second highest rise was in all types of DR in the T2DM population  
50  
51 (2.8 times). Splitting this data by the decades (1998 to 2007 versus 2009 to 2018),  
52  
53 the end of the first decade showed a higher increase in every category (diabetes as  
54  
55 well as diabetic retinopathy) as compared to the second decade, except in T1DM  
56  
57  
58  
59  
60

10

1  
2  
3  
4 where it was higher in second decade (Appendix 4). T2DM increased more than  
5  
6 T1DM between 1998 and 2018, but while the increase in T2DM prevalence slowed  
7  
8 recently, the increase in T1DM prevalence accelerated significantly in the recent  
9  
10 decade.  
11  
12  
13  
14  
15  
16  
17  
18  
19  
20  
21  
22  
23  
24  
25  
26  
27  
28  
29  
30  
31  
32  
33  
34  
35  
36  
37  
38  
39  
40  
41  
42  
43  
44  
45  
46  
47  
48  
49  
50  
51  
52  
53  
54  
55  
56  
57  
58  
59  
60

For peer review only

11

Table 1: Demography of patients with DM in IMRD data on 1st of January 2017

|                                       | <b>DM (N)</b> | <b>% / (SD)</b> | <b>T1DM (N)</b> | <b>% / (SD)</b> | <b>T2DM (N)</b> | <b>% / (SD)</b> |
|---------------------------------------|---------------|-----------------|-----------------|-----------------|-----------------|-----------------|
| <b>Total</b>                          | 180,824       | 100.00%         | 12,434          | 6.88%           | 168,390         | 93.12%          |
| <b>Gender</b>                         |               |                 |                 |                 |                 |                 |
| <b>Male</b>                           | 101,628       | 56.20%          | 7,192           | 57.84%          | 94,436          | 56.08%          |
| <b>Female</b>                         | 79,196        | 43.80%          | 5,242           | 42.16%          | 73,954          | 43.92%          |
| <b>Age</b>                            | 180,824       | 64.7 (SD 14.7)  | 12,434          | 42.5 (SD 17.2)  | 168,390         | 66.3 (SD 13.0)  |
| <b>Age at diagnosis</b>               | 180,788       | 54.6 (SD 16.0)  | 12,422          | 21.4 (SD 14.3)  | 168,366         | 57.0 (SD 13.1)  |
| <b>Townsend</b>                       |               |                 |                 |                 |                 |                 |
| <b>1</b>                              | 27,616        | 15.27%          | 2,037           | 16.38%          | 25,579          | 15.19%          |
| <b>2</b>                              | 30,011        | 16.60%          | 2,206           | 17.74%          | 27,805          | 16.51%          |
| <b>3</b>                              | 32,434        | 17.94%          | 2,222           | 17.87%          | 30,212          | 17.94%          |
| <b>4</b>                              | 31,332        | 17.33%          | 1,978           | 15.91%          | 29,354          | 17.43%          |
| <b>5</b>                              | 24,606        | 13.61%          | 1,568           | 12.61%          | 23,038          | 13.68%          |
| <b>Missing</b>                        | 34,825        | 19.26%          | 2,423           | 19.49%          | 32,402          | 19.24%          |
| <b>Ethnicity</b>                      |               |                 |                 |                 |                 |                 |
| <b>Caucasian</b>                      | 88,420        | 48.90%          | 6,584           | 52.95%          | 81,836          | 48.60%          |
| <b>Black afro Caribbean</b>           | 2,738         | 1.51%           | 98              | 0.79%           | 2640            | 1.57%           |
| <b>Chinese/Middle eastern/ others</b> | 567           | 0.31%           | 45              | 0.36%           | 522             | 0.31%           |
| <b>South Asians</b>                   | 6,361         | 3.52%           | 124             | 1.00%           | 6237            | 3.70%           |
| <b>Mixed race</b>                     | 1243          | 0.69%           | 32              | 0.26%           | 1211            | 0.72%           |
| <b>Missing</b>                        | 81,495        | 45.07%          | 5551            | 44.64%          | 75944           | 45.10%          |

DM-Diabetes Mellitus; T2DM – Type 2 Diabetes Mellitus; T1DM – Type 1 Diabetes Mellitus Number; N, Standard deviation; (SD)

12

### Forecasting model

The forecasted annual UK prevalence values of T1DM, T2DM, DR and STR, with their 95% prediction intervals (PI), are given in the Appendix 5. These suggest that the prevalence will increase by 24% (5 to 43%), 7% (-28 to 41%), 9% (-50 to 65%) and 17% (-21 to 54%) respectively by 2030. Corresponding estimates of the absolute numbers of people in the UK forecast to have these conditions are shown in Table 2. These correspond to 0.36 (.3 -.4), 4 (2.6 - 5.3), 1.6 (.7-2.5), and 0.64 (.42-.86) million people respectively having each condition respectively. We verified our UK forecast for 2019 and found the total figure (3,800,920) to be close to the Quality Outcome Framework provided estimate of diagnosed DM of 3,809,119.

13

Table 2: Future Projections of Diabetes and DR disease Burden

| Year | Projected Population | *T1DM  | *T2DM   | *Total DM | #DR     | #STR   |
|------|----------------------|--------|---------|-----------|---------|--------|
| 2019 | 66800000             | 280560 | 3520360 | 3800920   | 1311317 | 482717 |
| 2020 | 67200000             | 288960 | 3568320 | 3857280   | 1342333 | 497589 |
| 2021 | 67500000             | 297000 | 3604500 | 3901500   | 1369427 | 511097 |
| 2022 | 67800000             | 305100 | 3647640 | 3952740   | 1399270 | 525714 |
| 2023 | 68100000             | 306450 | 3684210 | 3990660   | 1420675 | 538739 |
| 2024 | 68400000             | 314640 | 3720960 | 4035600   | 1448780 | 552877 |
| 2025 | 68700000             | 322890 | 3764760 | 4087650   | 1479729 | 568183 |
| 2026 | 68900000             | 330720 | 3796390 | 4127110   | 1506395 | 581923 |
| 2027 | 69200000             | 339080 | 3833680 | 4172760   | 1535576 | 596705 |
| 2028 | 69400000             | 347000 | 3872520 | 4219520   | 1561222 | 611830 |
| 2029 | 69600000             | 354960 | 3904560 | 4259520   | 1588801 | 626149 |
| 2030 | 69800000             | 362960 | 3936720 | 4299680   | 1616680 | 640652 |

\*The DR and STR forecast is actual IMRD based figures projected for the UK population (28). Formula used is Affected Population = Projected Prevalence X Projected Population. # In calculating projections for diabetic retinopathy we have applied the retinopathy rates of those aged 12 and above for the whole diabetes population rather than for those above 12 years old (age at which retinopathy screening commences and was one of our inclusion criteria). This approximately gives the projected total population, as breakdown for over 12 years is not available but the number of patients with DM below 12 years is negligibly small.



14

## 2017 Cross-sectional analysis

In the 2017 data analysis, 180,824 patients had a code for diabetes prior to this date of which 12,434 (6.9%) were identified as T1DM and 168,390 (93.1%) were identified as T2DM. Patients with DM were more likely to be men (56.2% vs 43.8%). The prevalence of DR in different stages of progression is given in Table 3. Prevalence of any DR and STR among patients with DM aged 12 and above was 33.8% and 12.3% respectively. When stratified by diabetes type, a higher proportion of patients with T1DM had a more severe form of retinopathy than patients with T2DM (prevalence of STR was 29.7% vs 11% ), while prevalence of pre-STR (R0/R1 & M0) was higher among patients with T2DM (31.8% in T1DM vs 37.8% in T2DM). Each subcategory among STR population (R2 / R3 / M1 and their combinations), was present in higher proportion of patients with T1DM as compared to T2DM (R2: 3.7% vs 1.2%; R3: 12.1% vs 1.9%; and M1: 19.6% vs 7.0% respectively)]. A higher proportion of patients with T1DM compared to T2DM also received treatment procedures (Laser: 7.1% vs 1.3%; Vitreous injection and procedures: 5.1% vs 1.1%). There was also a higher proportion of documented cases of visual impairment or vision loss among T1DM [3.1% vs 2.8%].

Table 3: Diabetic Retinopathy in patients with DM in IMRD data on 1<sup>st</sup> of January 2017

|                                         | DM            |               | T1DM         |               | T2DM          |               |
|-----------------------------------------|---------------|---------------|--------------|---------------|---------------|---------------|
| Diabetes (N)                            | 180,824       | %             | 12,434       | %             | 168,390       | %             |
| No Retinopathy coding available         | 82,119        | 45.41%        | 3,846        | 30.93%        | 78,273        | 46.48%        |
| Retinopathy Coding available            | 98,705        | 54.59%        | 8,588        | 69.07%        | 90,117        | 53.52%        |
| <b>Pre-STR</b>                          | <b>67750</b>  | <b>37.47%</b> | <b>3951</b>  | <b>31.78%</b> | <b>63699</b>  | <b>37.83%</b> |
| <b>No DR (R0M0)</b>                     | 37,618        | 20.80%        | 1,472        | 11.84%        | 36,146        | 21.47%        |
| <b>R1</b>                               | 30,132        | 16.66%        | 2,479        | 19.94%        | 27,553        | 16.36%        |
| <b>STR</b>                              | <b>22,198</b> | <b>12.28%</b> | <b>3,693</b> | <b>29.70%</b> | <b>18,505</b> | <b>10.99%</b> |
| <b>STR without Rx or vision loss</b>    | 13,165        | 7.28%         | 2,271        | 18.26%        | 10,894        | 6.47%         |
| <b>R2</b>                               | 2,487         | 1.38%         | 454          | 3.65%         | 2,033         | 1.21%         |
| <b>R3</b>                               | 4,729         | 2.62%         | 1,505        | 12.10%        | 3,224         | 1.91%         |
| <b>M1</b>                               | 14,206        | 7.86%         | 2,440        | 19.62%        | 11,766        | 6.99%         |
| <b>STR with Rx and vision loss</b>      | 9,033         | 5.00%         | 1,422        | 11.44%        | 7,611         | 4.52%         |
| <b>Laser</b>                            | 3,092         | 1.71%         | 885          | 7.12%         | 2,207         | 1.31%         |
| <b>Vitreous injections / procedures</b> | 2,536         | 1.40%         | 637          | 5.12%         | 1,899         | 1.13%         |
| <b>Vision loss / blindness</b>          | 5,050         | 2.79%         | 384          | 3.09%         | 4,666         | 2.77%         |
| <b>None specific for STR or Pre-STR</b> | <b>8,757</b>  | <b>4.84%</b>  | <b>844</b>   | <b>6.79%</b>  | <b>7913</b>   | <b>4.70%</b>  |
| <b>Any retinopathy</b>                  | 61087         | 33.78%        | 7016         | 56.43%        | 53971         | 32.05%        |

DR – Diabetic retinopathy, R0 – no retinopathy, M0 – no maculopathy, R1, Background retinopathy, Pre-STR is combination of no diabetic retinopathy and background retinopathy, R2 is pre-proliferative diabetic retinopathy, R3 is proliferative diabetic retinopathy, M1 is diabetic maculopathy, STR is sight-threatening retinopathy which is a combination of R2, R3 and M1, Non-specific retinopathy is where it cannot be categorised into R1 or STR. Where colour codes are assigned, the same colour indicates that they are mutually exclusive. Where colour codes are not assigned they overlap within that category. For example, patients with M1 can have either R2 or R3, likewise patients who received laser treatment could have received vitreous injection. The WHO standards (31) were used for vision loss. Here all categories were combined into a single category.

16

## Discussion

### Principal findings

We explored the disease burden associated with DR in the UK from the past, present and future perspectives. Our study followed a tripartite structure, comprising of 1) a series of epidemiological studies throughout a 20-year span to document disease-specific trends, 2) training a forecasting model to predict the future disease burden to guide clinical practice and service development and 3) a detailed descriptive cross-sectional analysis in 2017 using a study population of 180,824 people with diabetes to explore contemporary prevalence estimates of different forms of DR.

Between 1998 and 2018, the prevalence of DR and STR increased. The prevalence of all DR in T2DM nearly tripled and STR almost quadrupled among patients with T1DM aged 12 and above. There was a parallel increase in the overall prevalence of DM. While the growth in the numbers of T1DM patients was less than that for patients with T2DM, stratifying the calculations by two decades showed a marked rise in the rate of increase in T1DM prevalence in the latter half of the whole period between 1998 and 2018. This was in sharp contrast to the trends in T2DM, STR and DR prevalence, which showed a higher rise in the decade between 1998 and 2007 but slowed down in the later decade between 2009 and 2018.

Our forecasting model showed that, in less than ten years, over 1.5 million people with diabetes will have some DR, almost two thirds of a million of whom will have STR. With T1DM expected to rise faster and higher, it is also likely to correspond to a comparatively higher rise in STR, forcing a further increase in demand on services.

17

1  
2  
3 A key parameter when calculating the current and future prevalence of DR is the  
4 accuracy of estimates of the trend of the underlying condition, i.e. the presence of  
5 DM. T1DM showed a smaller increase in the period starting from 1998, but this has  
6 accelerated since 2009. This is the most concerning recent trend considering that  
7 these are younger patients (mean age of diagnosis of 21.4 vs 57), having to live with  
8 the condition and its complications for more life years, and also suffering from the  
9 more severe form of DR, with the consequent disability, treatment burden and  
10 treatment costs. There is a recent report of a 3.4% annual increase in the incidence  
11 rate of T1DM in children (13). Although there is an association between T1DM and  
12 obesity (32), it is believed that the cause may be multifactorial, including hygiene,  
13 viral factors and vitamin D deficiency amongst others (33).

14  
15 The diagnosed DM prevalence based on the 2017 IMRD cross-sectional survey is  
16 5.2%. The detailed descriptive analysis in 2017 showed that, out of 180,824 people  
17 with diabetes, 33.8% had any DR as a complication, 12.3% had STR and  
18 importantly, 2.8% had blindness or vision loss. STR was 52% of total DR in T1DM  
19 and 34% of total DR in T2DM. In 2017, nearly one third of all patients with T1DM  
20 were affected by a sight threatening form of DR. This analysis also confirmed the  
21 notion that, from the health care perspective, neither DM type is “benign” with  
22 regards to DR risk, since DR severity is graver in T1DM, and absolute numbers of  
23 affected individuals are higher in T2DM.

24  
25 Diabetic complications are mainly macrovascular damage (coronary artery disease,  
26 peripheral arterial disease, and stroke) or microvascular damage to blood vessels in  
27 organs like kidney, foot and nerves (34). Tackling the first reduces mortality rate and  
28 might mean these patients living longer and consequently a higher prevalence of DR  
29 among higher risk patients. With greater efficacy and a rapid reduction of HBA1C,  
30  
31  
32  
33  
34  
35  
36  
37  
38  
39  
40  
41  
42  
43  
44  
45  
46  
47  
48  
49  
50  
51  
52  
53  
54  
55  
56  
57  
58  
59  
60

18

1  
2  
3 the new agents might induce progression of DR (early worsening) (35). So, with  
4 increased prevalence there may be a disproportionate rise in more high-risk DR  
5 cases. There are conflicting reports on direct effect of newer medical treatments like  
6 Incretin based therapies on DR (35, 36) but the follow-up is limited at the moment.  
7  
8  
9  
10  
11  
12

### 13 **Strengths and weaknesses of this study**

14  
15  
16 This study reports up to date prevalence figures of DM, DR and STR, as well as  
17 trends from 1998 to 2018, in a clinically relevant form, which clinicians and managers  
18 leading hospital eye services can use in the management of services for diabetes  
19 and diabetic retinopathy. Our work is based on a cross-sectional analysis of primary  
20 care data and is therefore closer to routine practice. Our findings have also been  
21 verified against PHE, DESP, and other previously published figures (5-7, 14, 30, 37,  
22 38). This is also the first observational IMRD based study to forecast the DM, DR  
23 and STR disease burden in the UK all together. While incorporating current evidence  
24 on the trend of underlying condition (DM), this study portrays a comprehensive  
25 analysis of the recent DR disease burden.  
26  
27  
28  
29  
30  
31  
32  
33  
34  
35  
36  
37  
38

39 This study has not however been adjusted for the risk factors for the  
40 incidence/prevalence of DM or DR. Other limitations are possible coding errors,  
41 difficulties of missing data, and the potential risk of an overestimation of vision  
42 failure. The findings of this study should be interpreted within that context. Firstly, the  
43 possible impact of coding errors, as well as subjectivity in documentation across a  
44 retrospective nationwide database involving several practices in different areas,  
45 cannot be precluded. This potential risk was minimised through a strict Read code  
46 selection process. The prevalence of severe DR was higher for those of South Asian  
47 and mixed ethnicity (9), therefore could have implications for local variations in its  
48  
49  
50  
51  
52  
53  
54  
55  
56  
57  
58  
59  
60

19

1  
2  
3 prevalence, and estimates could differ depending on the local ethnic mix. The  
4  
5 potential impact of several concomitant medications on the course of DR was not  
6  
7 captured in this study design. For the sake of future projections, estimates from  
8  
9 individuals over 12 years old were applied to the whole population to calculate the  
10  
11 final values, assuming that the number of DM patients under 12 is very low. Finally,  
12  
13 we acknowledge that these projections are subject to the assumption that factors  
14  
15 affecting the incidence, course and progression of the disease will remain stable  
16  
17 over the next few years.  
18  
19  
20  
21

22 We wanted to verify our figures against data from DESP which screens everyone  
23  
24 from age 12 (39) and Mathur et al. work (9). Both these research studies used a cut  
25  
26 off of over 12 years for their estimates. We wanted our findings to be generalizable  
27  
28 to the whole UK populations with diabetes including those under care of DRSP and  
29  
30 Hospital Eye Services. We also wanted it to be generalisable internationally where  
31  
32 majority of world population with diabetes is within one pool, without access to  
33  
34 screening services. Limitations of this age cut off are that 2017 figures are not easily  
35  
36 verifiable against PHE figures 2017 being over 17 years of age. So, verification  
37  
38 against that estimate is a bit problematic and thus adds uncertainty to our UK  
39  
40 forecast estimates  
41  
42  
43  
44  
45

46 **Strengths and weaknesses in relation to other studies, discussing particularly**  
47  
48 **any differences in results**  
49

50  
51 Gonzalez et al (14) reported an increasing prevalence of diabetes between the years  
52  
53 1996 and 2005 (10 years) based on THIN data analysis of patients aged 10 to 79  
54  
55 years old. They reported an overall increase of 54%. Our estimate between 1998  
56  
57 and 2005 (our data did not match the years) was 60%. In a Clinical Practice  
58  
59  
60

20

1  
2  
3 Research Datalink (CPRD) based study, Zghebi et al (38) found an overall increase  
4 of 64% in the patient population between 2004 to 2014, but this was limited to  
5 patients over 16 years old with T2DM. Our corresponding figures are 63%. Thus, our  
6 estimates fall midway between these two studies. Bagust is a future forecast for UK,  
7 but is limited to T2DM and is an underestimation (11). It projected T2DM figures for  
8 2036 to be 1.1 million.  
9

10  
11 The PHE estimate for prevalence of diabetes in UK in 2017 arrived at by Quality and  
12 Outcome Framework figures was 3.7 million (5.6%) in those aged 17 years and over  
13 (37) and included diagnosed patients with diabetes. Our estimate of diagnosed  
14 patients with diabetes in 2017 of 3.4 million (crude prevalence of 5.2%) in over 12  
15 years old population contrasts with the 2017 PHE figures. Similarly, PHE predicted  
16 the diabetes burden for 2025 to be 4.9 million for people aged over 16 years (40). It  
17 is not possible to make a direct comparison with our forecast of just under 4.3 million  
18 for 2025 because of our estimate being for people over 12 years of age but could  
19 mean the present study to be an underestimation. Alternatively, PHE figures could  
20 be an overestimation for 2017, because of the inbuilt assumptions in that model. Our  
21 estimate for 2019 matches the quality and outcome estimate of 3.8 million. IDF (41)  
22 estimated total diabetes prevalent cases (20 to 79 years old) to be 2.7 million in  
23 2017, which is an underestimation when compared to PHE and our study.  
24  
25  
26  
27  
28  
29  
30  
31  
32  
33  
34  
35  
36  
37  
38  
39  
40  
41  
42  
43  
44  
45  
46  
47

48 A recent DR prevalence study focussed on lower risk patients with diabetes under  
49 screening services (9). The DR period prevalence in the Mathur's study (2004 to  
50 2014) was found to be 48.4% for patients with T1DM and 28.3% for patients with  
51 T2DM, contrasting with point prevalence (2017) of 56.4% and 32.0% for patients with  
52 T1DM and T2DM respectively in our study. They also did not split the pathology into  
53 maculopathy and pre-proliferative categories, and did not include treatment and  
54  
55  
56  
57  
58  
59  
60

21

1  
2  
3 vision failure. Li et al 2019 (10) is the only study so far, that has projected DR till  
4  
5 2050. They estimated that 8.6 million people with diabetes (DR in 25% of the  
6  
7 European population with T2DM and 50% with T1DM) will have diabetic eye disease  
8  
9 inn 2050. The British studies included within this systematic review were based on  
10  
11 diabetic screening services from pre-2009 (42) and pre-2003 data (7). Case  
12  
13 definitions and patient pathways have since changed. Consequently, their figures are  
14  
15 a significant underestimation as compared to ours (710,510 vs 1,612,395 in 2030)  
16  
17  
18 Other prevalence studies from the UK (5-7, 30) are compared with estimates from  
19  
20 our study in detail for completeness in Appendix 6 and Appendix 7. The majority of  
21  
22 these UK studies are quite old, come from the screening programme setting, and do  
23  
24 not deal with all of the categories of DR due to changed case definitions. Keenen et  
25  
26 al (43) is a study based on work between 2007 and 2009 on hospital patients. They  
27  
28 based their estimates of prevalence in eyes rather than patients, therefore, due to  
29  
30 this heterogeneity, cannot be directly compared with our figures.  
31  
32  
33  
34  
35  
36  
37  
38  
39  
40  
41

### 42 **Meaning of the study: possible mechanisms and implications for clinicians or** 43 44 **policymakers** 45 46 47 48 49 50 51 52 53 54 55 56 57 58 59 60

42 Consecutive analyses over the course of over two decades provides information  
43  
44 regarding the trend and severity of diabetic disease, and by a detailed analysis of  
45  
46 different forms and severity groups, it captures the implications for the public health  
47  
48 system. With the use of relevant outcomes, coupled with a prerequisite validation,  
49  
50 the study provides a forecasting model which will be of use for clinicians and  
51  
52 managers leading the professional services in planning the capacity to meet the  
53  
54 increasing demand, and will guide public health strategy. Local demand can be  
55  
56  
57  
58  
59  
60



22

1  
2  
3 calculated with the help of national figures provided by taking local factors into  
4  
5 account.  
6  
7

8 Out of the 33.8% of total DR in all patients with diabetes, 12.3% was made up of the  
9  
10 STR. Those STR patients that actually needed treatment or experienced vision  
11  
12 failure constituted a total of 5%. These figures reflect a high false-positive rate of  
13  
14 referrals (50 - 70% as reported earlier (2, 44) and needs to be considered in the  
15  
16 future relationship between DESP and overburdened hospital eye services. Our  
17  
18 estimated prevalence figures, in a clinically relevant form will help the clinicians and  
19  
20 managers leading hospital eye services to optimise capacity planning for the  
21  
22 increased demand.  
23  
24  
25  
26

### 27 **Unanswered questions and future research**

28  
29  
30 PHE used a prevalence model to predict the disease burden of diabetes in 2016  
31  
32 (45). The predictive factors they used were age, ethnicity, gender and deprivation  
33  
34 index. To accommodate local variation in populations and practices, final  
35  
36 calculations can be made using these predictive factors. The above-mentioned  
37  
38 limitations of the study can be overcome by a future collaborative study linking DR  
39  
40 screening and hospital eye services data, with figures based on patient numbers and  
41  
42 not eyes, to prevent heterogeneity among studies. Forecasting capacity needs is an  
43  
44 area that should be repeated periodically with the help of the forecasting model  
45  
46 presented.  
47  
48  
49  
50

### 51 **Conclusion**

52  
53  
54 In our study, the estimates suggested a trend of differential rise in prevalence rates  
55  
56 in T1DM and T2DM. Overall, there is a continuing rise in the numbers of patients  
57  
58 with DM and DR needing care. Preventive strategies and service planning can be  
59  
60

23

based on these projected prevalence estimates to meet demand over the next ten years. Future forecasting will need repeating periodically to capture any external factors causing a change in the present trend.

**Acknowledgements / Contributions:** SH and KN designed the main study. AS performed data extraction. SH made the main contribution to the interpretation of data and wrote up the draft. RT designed and carried out the future projection model. AS, MP, DM, KT and KN made a contribution verbally or by critical revision of the draft. All authors approved the final version of the manuscript.

**Funding:** This research received no specific grant from any funding agency in the public, commercial or not-for-profit sectors.

## References

1. Bourne RRA, Jonas JB, Bron AM, Cicinelli MV, Das A, Flaxman SR, et al. Prevalence and causes of vision loss in high-income countries and in Eastern and Central Europe in 2015: magnitude, temporal trends and projections. *The British journal of ophthalmology*. 2018;102(5):575-85.
2. The Royal College of Ophthalmologists. The way forward age-related macular degeneration and diabetic retinopathy 2016  
[ ]. Available from: <https://www.rcophth.ac.uk/wp-content/uploads/2015/10/RCOphth-The-Way-Forward-AMD-300117.pdf>, Accessed 2019, July 20.
3. Sabanayagam C, Banu R, Chee ML, Lee R, Wang YX, Tan G, et al. Incidence and progression of diabetic retinopathy: a systematic review. *The Lancet Diabetes & Endocrinology*. 2019;7(2):140-9.
4. Buchan JC, Norman P, Shickle D, Cassels-Brown A, MacEwen C. Failing to plan and planning to fail. Can we predict the future growth of demand on UK Eye Care Services? *Eye (London, England)*. 2019;33(7):1029-31.
5. Thomas RL, Dunstan FD, Luzio SD, Chowdhury SR, North RV, Hale SL, et al. Prevalence of diabetic retinopathy within a national diabetic retinopathy screening service. *The British journal of ophthalmology*. 2015;99(1):64-8.
6. Misra A, Bachmann MO, Greenwood RH, Jenkins C, Shaw A, Barakat O, et al. Trends in yield and effects of screening intervals during 17 years of a large UK

- community-based diabetic retinopathy screening programme. *Diabetic medicine : a journal of the British Diabetic Association*. 2009;26(10):1040-7.
7. Younis N, Broadbent DM, Harding SP, Vora JP. Incidence of sight-threatening retinopathy in Type 1 diabetes in a systematic screening programme. *Diabetic Medicine*. 2003;20(9):758-65.
  8. Looker H, Nyangoma S, Cromie D, Olson J, Leese G, Black M, et al. Diabetic retinopathy at diagnosis of type 2 diabetes in Scotland. *Diabetologia*. 2012;55(9):2335-42.
  9. Mathur R, Bhaskaran K, Edwards E, Lee H, Chaturvedi N, Smeeth L, et al. Population trends in the 10-year incidence and prevalence of diabetic retinopathy in the UK: a cohort study in the Clinical Practice Research Datalink 2004-2014. *BMJ open*. 2017;7(2):e014444.
  10. Li JQ, Welchowski T, Schmid M, Letow J, Wolpers C, Pascual-Camps I, et al. Prevalence, incidence and future projection of diabetic eye disease in Europe: a systematic review and meta-analysis. *Eur J Epidemiol*. 2019.
  11. Bagust A, Hopkinson PK, Maslove L, Currie CJ. The projected health care burden of Type 2 diabetes in the UK from 2000 to 2060. *Diabetic medicine : a journal of the British Diabetic Association*. 2002;19 Suppl 4:1-5.
  12. Candler T, Mahmoud O, Lynn R, Majbar A, Barrett T, Shield J. Continuing rise of type 2 diabetes incidence in children and young people in the UK. *Diabetic Medicine*. 2018;35(6):737-44.
  13. Patterson CC, Harjutsalo V, Rosenbauer J, Neu A, Cinek O, Skrivarhaug T, et al. Trends and cyclical variation in the incidence of childhood type 1 diabetes in 26 European centres in the 25 year period 1989–2013: a multicentre prospective registration study. *Diabetologia*. 2019;62(3):408-17.
  14. Gonzalez EL, Johansson S, Wallander MA, Rodriguez LA. Trends in the prevalence and incidence of diabetes in the UK: 1996-2005. *Journal of epidemiology and community health*. 2009;63(4):332-6.
  15. Public Health England. Diabetes Prevalence 2019 2019 [Available from: <https://www.diabetes.org.uk/professionals/position-statements-reports/statistics/diabetes-prevalence-2019>, Accessed 2020, May 12.
  16. Maguire A, Blak BT, Thompson M. The importance of defining periods of complete mortality reporting for research using automated data from primary care. *Pharmacoepidemiology and drug safety*. 2009;18(1):76-83.
  17. Blak BT, Thompson M, Dattani H, Bourke A. Generalisability of The Health Improvement Network (THIN) database: demographics, chronic disease prevalence and mortality rates. *Informatics in primary care*. 2011;19(4):251-5.
  18. Martin-Merino E, Fortuny J, Rivero E, Garcia-Rodriguez LA. Validation of diabetic retinopathy and maculopathy diagnoses recorded in a U.K. primary care database. *Diabetes care*. 2012;35(4):762-7.
  19. Martin-Merino E, Fortuny J, Rivero-Ferrer E, Garcia-Rodriguez LA. Incidence of retinal complications in a cohort of newly diagnosed diabetic patients. *PLoS one*. 2014;9(6):e100283.
  20. Martin-Merino E, Fortuny J, Rivero-Ferrer E, Lind M, Garcia-Rodriguez LA. Risk factors for diabetic retinopathy in people with Type 2 diabetes: A case-control study in a UK primary care setting. *Primary care diabetes*. 2016;10(4):300-8.
  21. McEwan P, Bennett H, Ward T, Bergenheim K. Refitting of the UKPDS 68 risk equations to contemporary routine clinical practice data in the UK. *Pharmacoeconomics*. 2015;33(2):149-61.

- 1
- 2
- 3
- 4 22. Dave S, Petersen I. Creating medical and drug code lists to identify cases in
- 5 primary care databases. *Pharmacoepidemiology and drug safety*. 2009;18(8):704-7.
- 6 23. Public Health England. Diabetes Prevalence Model 2016 [Available from:
- 7 [https://assets.publishing.service.gov.uk/government/uploads/system/uploads/attach](https://assets.publishing.service.gov.uk/government/uploads/system/uploads/attachment_data/file/612306/Diabetesprevalencemodelbriefing.pdf)
- 8 [ment\\_data/file/612306/Diabetesprevalencemodelbriefing.pdf](https://assets.publishing.service.gov.uk/government/uploads/system/uploads/attachment_data/file/612306/Diabetesprevalencemodelbriefing.pdf), Accessed 2019, July
- 9 12.
- 10 24. Haider S, Sadiq SN, Moore D, Price MJ, Nirantharakumar K. Prognostic
- 11 prediction models for diabetic retinopathy progression: a systematic review. *Eye*.
- 12 2019;33(5):702-13.
- 13 25. Rob J Hyndman and George Athanasopoulos. *Forecasting: Principles and*
- 14 *Practice*, [Available from: <https://otexts.com/fpp2/tspatterns.html>].
- 15 26. Adams RJ, Tucker G, Hugo G, Hill CL, Wilson DH. Projected future trends of
- 16 hospital service use for selected obesity-related conditions. *Obesity research &*
- 17 *clinical practice*. 2008;2(2):133-41.
- 18 27. R Core Team. *R: A language and environment for statistical computing*. R
- 19 Foundation for Statistical Computing, Vienna, Austria. 2019 [Available from:
- 20 <http://www.R-project.org/>].
- 21 28. Office For national Statistics. National population projections: 2018-based,
- 22 [Figure 1: UK population projected to rise to 69.4 million by mid 2028 and to 72.4
- 23 million by mid 2043]. 2019 [Available from:
- 24 [https://www.ons.gov.uk/peoplepopulationandcommunity/populationandmigration/pop](https://www.ons.gov.uk/peoplepopulationandcommunity/populationandmigration/populationprojections/bulletins/nationalpopulationprojections/2018based)
- 25 [ulationprojections/bulletins/nationalpopulationprojections/2018based](https://www.ons.gov.uk/peoplepopulationandcommunity/populationandmigration/populationprojections/bulletins/nationalpopulationprojections/2018based), Accessed 24th
- 26 November 2020.
- 27 29. Public Health England. Diabetic Eye Screening: 2016 to 2017 Data 2017
- 28 [Available from: [https://www.gov.uk/government/publications/diabetic-eye-screening-](https://www.gov.uk/government/publications/diabetic-eye-screening-2016-to-2017-data)
- 29 [2016-to-2017-data](https://www.gov.uk/government/publications/diabetic-eye-screening-2016-to-2017-data), Accessed 2019, July 12.
- 30 30. Minassian DC, Owens DR, Reidy A. Prevalence of diabetic macular oedema
- 31 and related health and social care resource use in England. *The British journal of*
- 32 *ophthalmology*. 2012;96(3):345-9.
- 33 31. World Health Organization. Blindness and vision impairment - key facts, 2019
- 34 [Available from: [https://www.who.int/news-room/fact-sheets/detail/blindness-and-](https://www.who.int/news-room/fact-sheets/detail/blindness-and-visual-impairment)
- 35 [visual-impairment](https://www.who.int/news-room/fact-sheets/detail/blindness-and-visual-impairment), accessed August 06, 2020.
- 36 32. Łuczyński W, Szypowska A, Głowińska-Olszewska B, Bossowski A.
- 37 Overweight, obesity and features of metabolic syndrome in children with diabetes
- 38 treated with insulin pump therapy. *European journal of pediatrics*. 2011;170(7):891-8.
- 39 33. Egro FM. Why is type 1 diabetes increasing? *Journal of molecular*
- 40 *endocrinology*. 2013;51(1):R1-13.
- 41 34. Fowler MJ. Microvascular and Macrovascular Complications of Diabetes.
- 42 *Clinical Diabetes*. 2008;26(2):77-82.
- 43 35. DeFronzo RA. Combination therapy with GLP-1 receptor agonist and SGLT2
- 44 inhibitor. *Diabetes Obes Metab*. 2017;19(10):1353-62.
- 45 36. Wang T, Hong JL, Gower EW, Pate V, Garg S, Buse JB, et al. Incretin-Based
- 46 Therapies and Diabetic Retinopathy: Real-World Evidence in Older U.S. Adults.
- 47 *Diabetes care*. 2018;41(9):1998-2009.
- 48 37. Diabetes UK. Diabetes Prevalence 2017, Quality and Outcomes Framework
- 49 2018 [Available from: [https://www.diabetes.org.uk/professionals/position-statements-](https://www.diabetes.org.uk/professionals/position-statements-reports/statistics/diabetes-prevalence-2017)
- 50 [reports/statistics/diabetes-prevalence-2017](https://www.diabetes.org.uk/professionals/position-statements-reports/statistics/diabetes-prevalence-2017), Accessed 2019, July 12.
- 51 38. Zghebi SS, Steinke DT, Carr MJ, Rutter MK, Emsley RA, Ashcroft DM.
- 52 Examining trends in type 2 diabetes incidence, prevalence and mortality in the UK
- 53 between 2004 and 2014. *Diabetes Obes Metab*. 2017;19(11):1537-45.
- 54
- 55
- 56
- 57
- 58
- 59
- 60

- 1  
2  
3 39. Scanlon PH. The English National Screening Programme for diabetic  
4 retinopathy 2003-2016. *Acta Diabetol.* 2017;54(6):515-25.  
5  
6 40. Public Health England. Diabetic Eye Screening: 2016 to 2017 Data 2017  
7 [Available from: [https://www.gov.uk/government/publications/diabetic-eye-screening-](https://www.gov.uk/government/publications/diabetic-eye-screening-2016-to-2017-data)  
8 [2016-to-2017-data](https://www.gov.uk/government/publications/diabetic-eye-screening-2016-to-2017-data), Accessed 2019, July 12  
9  
10 41. Cho NH, Shaw JE, Karuranga S, Huang Y, da Rocha Fernandes JD,  
11 Ohlogge AW, et al. IDF Diabetes Atlas: Global estimates of diabetes prevalence for  
12 2017 and projections for 2045. *Diabetes research and clinical practice.*  
13 2018;138:271-81.  
14 42. Thomas RL, Dunstan F, Luzio SD, Roy Chowdury S, Hale SL, North RV, et al.  
15 Incidence of diabetic retinopathy in people with type 2 diabetes mellitus attending the  
16 Diabetic Retinopathy Screening Service for Wales: retrospective analysis. *BMJ.*  
17 2012;344:e874.  
18 43. Keenan TD, Johnston RL, Donachie PH, Sparrow JM, Stratton IM, Scanlon P.  
19 United Kingdom National Ophthalmology Database Study: Diabetic Retinopathy;  
20 Report 1: prevalence of centre-involving diabetic macular oedema and other grades  
21 of maculopathy and retinopathy in hospital eye services. *Eye (London, England).*  
22 2013;27(12):1397-404.  
23  
24 44. Jyothi S, Elahi B, Srivastava A, Poole M, Nagi D, Sivaprasad S. Compliance  
25 with the quality standards of National Diabetic Retinopathy Screening Committee.  
26 *Primary care diabetes.* 2009;3(2):67-72.  
27  
28 45. Public Health England. Diabetes Prevalence Estimates for CCG's by GP  
29 registered populations 2016 [Available from:  
30 [https://www.gov.uk/government/publications/diabetes-prevalence-estimates-for-](https://www.gov.uk/government/publications/diabetes-prevalence-estimates-for-local-populations)  
31 [local-populations](https://www.gov.uk/government/publications/diabetes-prevalence-estimates-for-local-populations), Accessed 2020, May 12.  
32  
33  
34  
35  
36  
37  
38  
39  
40  
41  
42  
43  
44  
45  
46  
47  
48  
49  
50  
51  
52  
53  
54  
55  
56  
57  
58  
59  
60

27

## Titles and legends to figures

**Figure 1: Patients flow and case selection algorithm**

**Figure 2: Prevalence trends of DM from year 1998 to year 2018**

T1DM - Type 1 Diabetes Mellitus, T2DM - Type 2 Diabetes Mellitus

**Figure 3: Annual prevalence (95% CI) of DR and STR from year 1998 to year 2018**

DR - Diabetic Retinopathy, STR - Sight threatening Retinopathy

For peer review only

1  
2  
3  
4  
5  
6  
7  
8  
9  
10  
11  
12  
13  
14  
15  
16  
17  
18  
19  
20  
21  
22  
23  
24  
25  
26  
27  
28  
29  
30  
31  
32  
33  
34  
35  
36  
37  
38  
39  
40  
41  
42  
43  
44  
45  
46  
47  
48  
49  
50  
51  
52  
53  
54  
55  
56  
57  
58  
59  
60

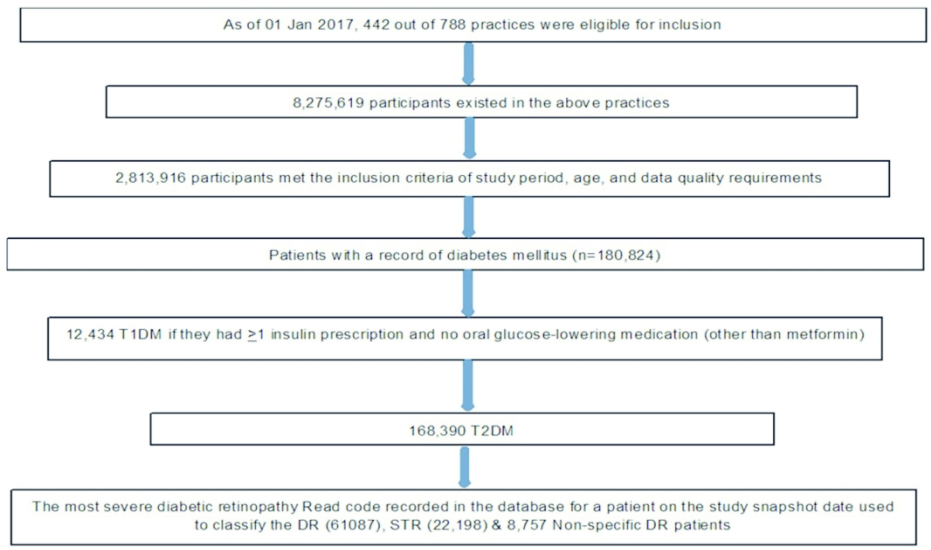

Figure 1: Patients flow and case selection algorithm

207x116mm (300 x 300 DPI)



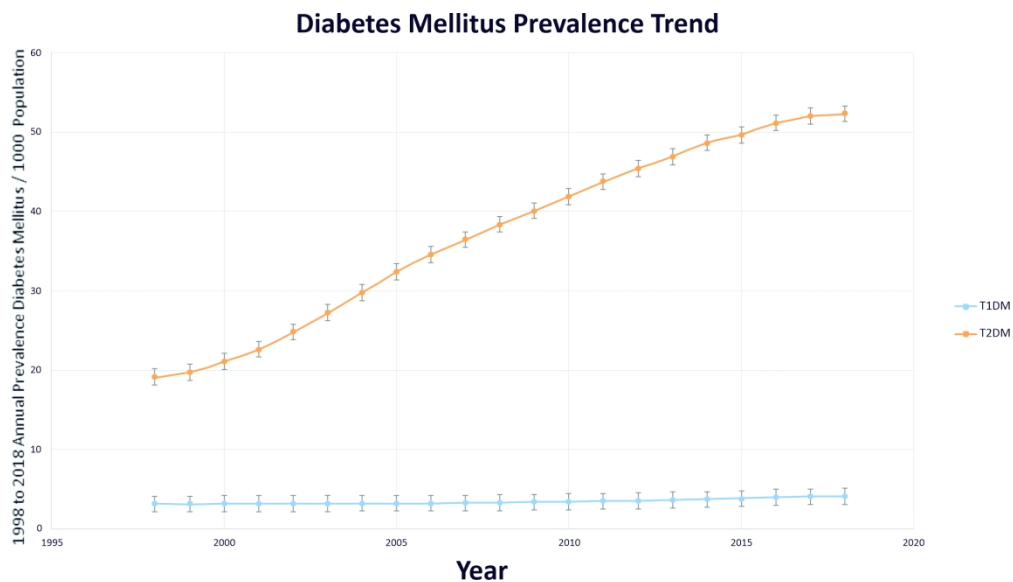

Figure 2: Prevalence trends of DM from year 1998 to year 2018

209x119mm (300 x 300 DPI)



1  
2  
3  
4  
5  
6  
7  
8  
9  
10  
11  
12  
13  
14  
15  
16  
17  
18  
19  
20  
21  
22  
23  
24  
25  
26  
27  
28  
29  
30  
31  
32  
33  
34  
35  
36  
37  
38  
39  
40  
41  
42  
43  
44  
45  
46  
47  
48  
49  
50  
51  
52  
53  
54  
55  
56  
57  
58  
59  
60

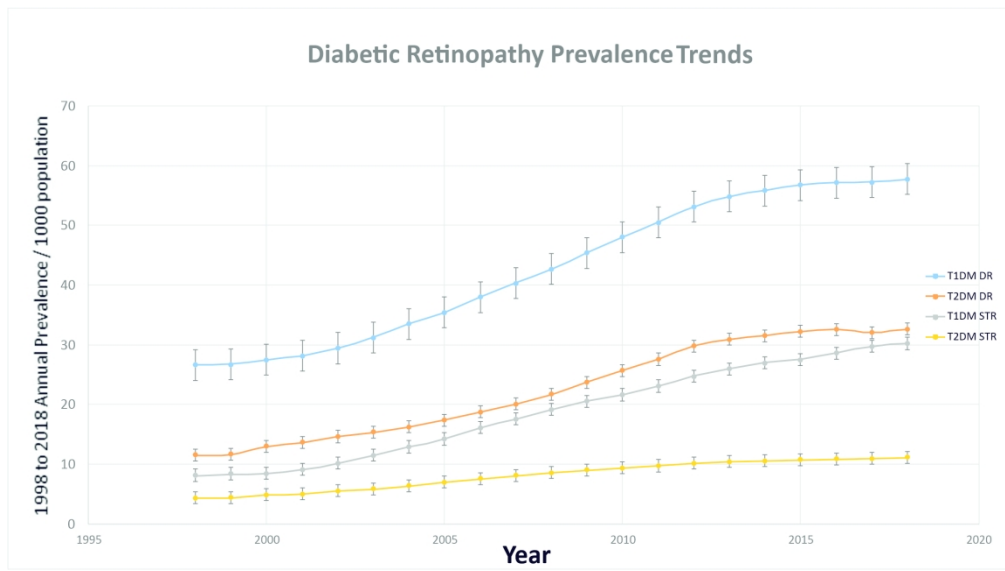

Figure 3: Annual prevalence (95% CI) of DR and STR from year 1998 to year 2018

206x115mm (300 x 300 DPI)

## Appendix 1: 7 Step Process of Read codes selection methods

Read codes cover clinical features, diagnosis, procedures, some drugs and investigations (1). Ones used in IMRD consist of 7 characters. They have a hierarchy with more specific ones down the order. This was done in collaboration with Jhot Chandan, a fellow doctoral researcher and my supervisor Krishnarajah Nirantharakumar (Institute of Applied Health Research)

1. The Read code database (MsAccess, MsExcel) is divided into two main columns: A Medcode column with unique 8 character codes for each condition and a description column. Both were used.
2. We developed a list of key search terms for the read codes of interest. These were searched for in the description column. Appendix below provides a list of key search words.
3. Results from the key word search were used to identify the main stem codes where the Read codes of interest belong to.
4. The Next step involved searching the MedCode column for the main stem codes to pick out codes that were otherwise missed on searching the description column.
5. We then also conducted an online search of published articles that have published similar Read Codes (2, 3).
6. Once collected, they were split into possible, probable and definite. There was deliberation between clinicians in the THINKing group to achieve these three lists.
7. They were then hand over to a group of data scientists within the THINKing group who split them into various files following epidemiological principles and saved them in CSV files database.

1  
2  
3  
4  
5  
6  
7  
8  
9  
10  
11  
12  
13  
14  
15  
16  
17  
18  
19  
20  
21  
22  
23  
24  
25  
26  
27  
28  
29  
30  
31  
32  
33  
34  
35  
36  
37  
38  
39  
40  
41  
42  
43  
44  
45  
46  
47  
48  
49  
50  
51  
52  
53  
54  
55  
56  
57  
58  
59  
60

**References:**

1. Health I. THIN Data Guide for Researchers. 2017(Version 3):108.
2. Mathur R, Bhaskaran K, Edwards E, Lee H, Chaturvedi N, Smeeth L, et al. Population trends in the 10-year incidence and prevalence of diabetic retinopathy in the UK: a cohort study in the Clinical Practice Research Datalink 2004-2014. *BMJ open*. 2017;7(2):e014444.
3. McEwan P, Bennett H, Ward T, Bergenheim K. Refitting of the UKPDS 68 risk equations to contemporary routine clinical practice data in the UK. *Pharmacoeconomics*. 2015;33(2):149-61.

For peer review only

## Appendix 2: Search Terms for diabetic Retinopathy

| Keywords for identifying diabetic retinopathy in the Read Codes Dictionary                                                                                                                                                                                                    |
|-------------------------------------------------------------------------------------------------------------------------------------------------------------------------------------------------------------------------------------------------------------------------------|
| *O/E* or *PHOTOGRAPHY* or *RETINAL* or *SCR* <b>and</b> *HAEMORRHAGES* or *EXUDATE* or *MICROANEURYSMS* or *INTRARETINAL MICROVASCULAR ANAOMALY* or *ABNORMALITY*                                                                                                             |
| *RETINA* or *FUNDUS* or *MACULAR* or *VITREOUS* <b>and</b> *LASER” or *PHOTOCOAGULATION* or *INTRA-VITREAL INJECTIONS* or *INJECTIONS* or *RANIBIZUMAB* or *BIVACIZUMAB* or *AFLIBERCEPT* or *TRIAMCINOLON* or *ILEUVIEN* or *DEXAMETHOSON*                                   |
| *RETINOPATHY* or *FUNDOSCOPY* or *SEEN or *RETINAL SCR* or *RETINOSCOPY* or *SLIT LAMP* or *DIABETIC EYE* or *EXAMINATION OF RETINA* or *RETINA and OTHER PARTS OF EYE OPERATIONS* or *VITRECTOMY* or *MACULOPATHY* or *BACKGROUND* or *PRE PROLIFERATIVE* or *PROLIFERATIVE* |
| *BLIND” or *PARTIAL SIGHTED” or **SIGHT IMPAIRMENT” or *VISUAL IMPAIRMENT” or *VISUAL FAILURE”                                                                                                                                                                                |

## Appendix 3: Read Codes

| Code                                               | Description                                                       | Status   |
|----------------------------------------------------|-------------------------------------------------------------------|----------|
| <b>No Retinopathy (ROMO)</b>                       |                                                                   |          |
| 2BBD.00                                            | O/E - Right retina normal                                         | Probable |
| 2BBJ.00                                            | O/E - no right diabetic retinopathy                               | Definite |
| 2BB1.00                                            | O/E - retina normal                                               | Probable |
| 2BBI.00                                            | O/E - no retinopathy                                              | Definite |
| 3128000                                            | Fundoscopy normal                                                 | Probable |
| 3128200                                            | Dilated fundoscopy normal                                         | Probable |
| 2BBM.00                                            | O/E - diabetic maculopathy absent both eyes                       | Possible |
| <b>Background Retinopathy (R1)</b>                 |                                                                   |          |
| 2BBP.00                                            | O/E - right eye background diabetic retinopathy                   | Definite |
| 2BBQ.00                                            | O/E - left eye background diabetic retinopathy                    | Definite |
| F420000                                            | Background diabetic retinopathy                                   | Definite |
| F421.00                                            | Other background retinopathy                                      | Definite |
| F421000                                            | Unspecified background retinopathy                                | Definite |
| F421z00                                            | Other background retinopathy NOS                                  | Definite |
| 2BB4.00                                            | O/E - retinal microaneurysms                                      | Definite |
| 2BBa.00                                            | O/E- non-referable retinopathy                                    | Probable |
| <b>Pre proliferative Diabetic Retinopathy (R2)</b> |                                                                   |          |
| F420200                                            | Pre proliferative diabetic retinopathy                            | Definite |
| 2BBR.00                                            | O/E - right eye pre proliferative diabetic retinopathy            | Definite |
| 2BBS.00                                            | O/E - left eye pre proliferative diabetic retinopathy             | Definite |
| F420800                                            | High risk non proliferative diabetic retinopathy                  | Definite |
| <b>Proliferative Diabetic Retinopathy (R3)</b>     |                                                                   |          |
| 2BBk.00                                            | O/E - right eye stable treated proliferative diabetic retinopathy | Definite |
| 2BBI.00                                            | O/E - left eye stable treated proliferative diabetic retinopathy  | Definite |
| F420100                                            | Proliferative diabetic retinopathy                                | Definite |
| F420700                                            | High risk proliferative diabetic retinopathy                      | Definite |
| F422z00                                            | Proliferative retinopathy NOS                                     | Definite |
| F422.00                                            | Other proliferative retinopathy                                   | Definite |
| FyuF700                                            | [X]Other proliferative retinopathy                                | Definite |
| 2BBT.00                                            | O/E - right eye proliferative diabetic retinopathy                | Definite |
| 2BBV.00                                            | O/E - left eye proliferative diabetic retinopathy                 | Definite |
| 7272500                                            | Panretinal laser photocoagulation to lesion of retina NEC         | Definite |
| 7272800                                            | Panretinal laser photocoagulation to lesion of retina             | Definite |
| 2BB7.00                                            | O/E - retinal vascular prolifer.                                  | Probable |
| 2BB8.00                                            | O/E - vitreous haemorrhages                                       | Probable |
| 7276                                               | Pan retinal photocoagulation for diabetes                         | Definite |
| F420500                                            | Advanced diabetic retinal disease                                 | Possible |
| F422y00                                            | Other specified other proliferative retinopathy                   | Definite |

|                                            |                                                          |          |
|--------------------------------------------|----------------------------------------------------------|----------|
| F4K2800                                    | Vitreous haemorrhage                                     | Probable |
| FyuH400                                    | [X]Vitreous haemorrhage in diseases classified elsewhere | Probable |
| 2BB8.00                                    | O/E - vitreous haemorrhages                              | Probable |
| <b>Diabetic Maculopathy (M1)</b>           |                                                          |          |
| 2BBL.00                                    | O/E - Diabetic maculopathy present both eyes             | Definite |
| 2BBm.00                                    | O/E - right eye clinically significant macular oedema    | Definite |
| 2BBn.00                                    | O/E - left eye clinically significant macular oedema     | Definite |
| 2BBW.00                                    | O/E - right eye diabetic maculopathy                     | Definite |
| 2BBX.00                                    | O/E - left eye diabetic maculopathy                      | Definite |
| F425900                                    | Maculopathy                                              | Definite |
| F42y900                                    | Macular oedema                                           | Definite |
| C10EP00                                    | Type 1 diabetes mellitus with exudative maculopathy      | Definite |
| C10EP11                                    | Type I diabetes mellitus with exudative maculopathy      | Definite |
| C10FQ00                                    | Type 2 diabetes mellitus with exudative maculopathy      | Definite |
| C10FQ11                                    | Type II diabetes mellitus with exudative maculopathy     | Definite |
| F420300                                    | Advanced diabetic maculopathy                            | Definite |
| 7272900                                    | Focal laser photocoagulation of retina                   | Probable |
| F420400                                    | Diabetic maculopathy                                     | Definite |
| <b>Referrable Retinopathy (R2, R3, M1)</b> |                                                          |          |
| 2BBY.00                                    | O/E - referable retinopathy                              | Definite |
| 2BBo.00                                    | O/E - sight threatening diabetic retinopathy             | Definite |
| <b>Advanced diabetic retinal disease</b>   |                                                          |          |
| F420500                                    | Advanced diabetic retinal disease                        | Definite |

| Code                    | Description                                                       | Status   |
|-------------------------|-------------------------------------------------------------------|----------|
| <b>Laser Procedures</b> |                                                                   |          |
| 7276                    | Pan retinal photocoagulation for diabetes                         | Definite |
| 7272012                 | Photocoagulation of the retina NEC                                | Definite |
| 7272013                 | Laser therapy lesion of retina                                    | Definite |
| 7272300                 | Laser destruction of lesion of retina                             | Definite |
| 7272500                 | Pan retinal laser photocoagulation to lesion of retina NEC        | Definite |
| 7272600                 | Laser photocoagulation to lesion of retina NEC                    | Definite |
| 7272800                 | Pan retinal laser photocoagulation to lesion of retina            | Definite |
| 7272900                 | Focal laser photocoagulation of retina                            | Definite |
| 2BBk.00                 | O/E - right eye stable treated proliferative diabetic retinopathy | Definite |
| 2BBI.00                 | O/E - left eye stable treated proliferative diabetic retinopathy  | Definite |
| 2BBO.00                 | O/E - Laser photocoagulation scars                                | Definite |
| 5B4..11                 | Retinal laser therapy                                             | Definite |
| Z6F..11                 | Laser therapy                                                     | Definite |

|                                                      |                                                                 |          |
|------------------------------------------------------|-----------------------------------------------------------------|----------|
| 5B42.00                                              | Laser therapy - retinal lesion                                  | Definite |
| <b>Vitreous/ Peribulbar procedures / haemorrhage</b> |                                                                 |          |
| 7270D00                                              | Injection of Ranibizumab into vitreous body                     | Definite |
| 7270z00                                              | Operation on vitreous body NOS                                  | Definite |
| 7270300                                              | Injection into vitreous body NEC                                | Definite |
| 7274800                                              | Injection of therapeutic substance around the eye               | Possible |
| 727C200                                              | Injection therapeutic substance posterior segment of eye<br>NEC | Definite |
| 7270D00                                              | Injection of Ranibizumab into vitreous body                     | Definite |
| 7L19E00                                              | Injection of triamcinolone                                      | Probable |
| 727C100                                              | Injection of steroid into posterior segment of eye              | Definite |
| 7270200                                              | Injection of vitreous substitute into vitreous body             | Definite |
| 7277600                                              | Injection of therapeutic substance into macula                  | Definite |
| 7270C00                                              | Injection of vitreous substitute into vitreous body NEC         | Definite |
| 727C100                                              | Injection of steroid into posterior segment of eye              | Definite |
| 7270400                                              | Pars plana vitrectomy                                           | Definite |
| 727Cy00                                              | Other specified operations on posterior segment of eye          | Probable |
| 727Cz00                                              | Operations on posterior segment of eye NOS                      | Probable |
| 7273000                                              | Epiretinal dissection                                           | Possible |
| 727C000                                              | Insertion sustained release device posterior segment of<br>eye  | Definite |
| 7270y00                                              | Other specified operation on vitreous body                      | Definite |
| 7270800                                              | Internal tamponade of retina using liquid                       | Possible |
| 7270900                                              | Internal tamponade of retina using oil                          | Possible |
| 7270A00                                              | Removal of internal tamponade agent from vitreous body          | Possible |
| 7270411                                              | Vitrectomy using pars plana approach                            | Probable |
| 7270500                                              | Air/gas exchange of vitreous                                    | Possible |
| 7270600                                              | Internal tamponade of retina using gas                          | Probable |
| 7270200                                              | Injection of vitreous substitute into vitreous body             | Probable |
| 7270300                                              | Injection into vitreous body NEC                                | Definite |
| 7270400                                              | Pars plana vitrectomy                                           | Definite |
| 7270                                                 | Operations on vitreous body                                     | Probable |
| 7270100                                              | Extirpation of vitreous body NEC                                | Probable |
| F4K2800                                              | Vitreous haemorrhage                                            | Definite |
| FyuH400                                              | [X]Vitreous haemorrhage in diseases classified elsewhere        | Definite |
| 2BB8.00                                              | O/E - vitreous haemorrhages                                     | Definite |
| <b>Vision loss / blindness</b>                       |                                                                 |          |
| ZV52200                                              | [V]Fitting or adjustment of artificial eye                      | Probable |
| ZV43000                                              | [V]Has artificial eye globe                                     | Probable |
| ZV43100                                              | [V]Has artificial eye lens                                      | Possible |
| FyuL.00                                              | [X]Visual disturbances and blindness                            | Definite |
| F49z.11                                              | Acquired blindness                                              | Definite |
| F490900                                              | Acquired blindness, both eyes                                   | Definite |
| F495A00                                              | Acquired blindness, one eye                                     | Definite |

|    |         |                                                             |          |
|----|---------|-------------------------------------------------------------|----------|
| 1  |         |                                                             |          |
| 2  |         |                                                             |          |
| 3  |         |                                                             |          |
| 4  | F491.00 | Better eye: low vision, Lesser eye: profound VI             | Definite |
| 5  | F491500 | Better eye: moderate VI, Lesser eye: blind, unspecified     | Definite |
| 6  |         |                                                             |          |
| 7  | F492300 | Better eye: moderate VI, Lesser eye: low vision unspecified | Definite |
| 8  |         |                                                             |          |
| 9  | F492500 | Better eye: moderate VI, Lesser eye: moderate VI            | Definite |
| 10 | F491700 | Better eye: moderate VI, Lesser eye: near total VI          | Definite |
| 11 |         |                                                             |          |
| 12 | F491800 | Better eye: moderate VI, Lesser eye: profound VI            | Definite |
| 13 | F492400 | Better eye: moderate VI, Lesser eye: severe VI              | Definite |
| 14 | F491600 | Better eye: moderate VI, Lesser eye: total VI               | Definite |
| 15 | F490400 | Better eye: near total VI, Lesser eye: near total VI        | Definite |
| 16 |         |                                                             |          |
| 17 | F490300 | Better eye: near total VI, Lesser eye: total VI             | Definite |
| 18 | F490200 | Better eye: near total VI, Lesser eye: unspecified          | Definite |
| 19 | F490700 | Better eye: profound VI, Lesser eye: near total VI          | Definite |
| 20 | F490800 | Better eye: profound VI, Lesser eye: profound VI            | Definite |
| 21 |         |                                                             |          |
| 22 | F490600 | Better eye: profound VI, Lesser eye: total VI               | Definite |
| 23 | F490500 | Better eye: profound VI, Lesser eye: unspecified            | Definite |
| 24 | F491100 | Better eye: severe VI, Lesser eye: blind, unspecified       | Definite |
| 25 | F492100 | Better eye: severe VI, Lesser eye: low vision unspecified   | Definite |
| 26 |         |                                                             |          |
| 27 | F491300 | Better eye: severe VI, Lesser eye: near total VI            | Definite |
| 28 | F491400 | Better eye: severe VI, Lesser eye: profound VI              | Definite |
| 29 | F492200 | Better eye: severe VI, Lesser eye: severe VI                | Definite |
| 30 | F491200 | Better eye: severe VI, Lesser eye: total VI                 | Definite |
| 31 |         |                                                             |          |
| 32 | 8F62.00 | Blind lead dog rehabilitation                               | Definite |
| 33 | 8F6..11 | Blind rehabilitation                                        | Definite |
| 34 | 8F61.00 | Blind rehabilitation                                        | Definite |
| 35 |         |                                                             |          |
| 36 | ZN56800 | Blind telephone user                                        | Definite |
| 37 | F49..00 | Blindness and low vision                                    | Definite |
| 38 | F490z00 | Blindness both eyes NOS                                     | Definite |
| 39 | F490.00 | Blindness, both eyes                                        | Definite |
| 40 | F49A.00 | Blindness, monocular                                        | Definite |
| 41 |         |                                                             |          |
| 42 | F495000 | Blindness, one eye, unspecified                             | Definite |
| 43 | F490100 | Both eyes total visual impairment                           | Definite |
| 44 | 668C.00 | Certificate of vision impairment                            | Definite |
| 45 | Fy1..00 | Combined visual and hearing impairment                      | Definite |
| 46 |         |                                                             |          |
| 47 | Fy1..12 | Deafblind                                                   | Definite |
| 48 | ZN56A00 | Deaf-blind telephone user                                   | Definite |
| 49 | Fy1..11 | Dual sensory impairment - deafblind                         | Definite |
| 50 | 9m08.00 | Exclu diab ret screen as blind                              | Definite |
| 51 |         |                                                             |          |
| 52 | 2BBr.00 | Impair vision due diab retinop                              | Definite |
| 53 | F49..11 | Impaired vision                                             | Definite |
| 54 | ZK74.00 | Issue of local authority blind registration                 | Definite |
| 55 | F494.00 | Legal blindness USA                                         | Definite |
| 56 |         |                                                             |          |
| 57 | F496500 | Lesser eye: moderate VI, Better eye: near normal vision     | Definite |
| 58 | F496600 | Lesser eye: moderate VI, Better eye: normal vision          | Definite |
| 59 |         |                                                             |          |
| 60 |         |                                                             |          |



1  
2  
3  
4  
5  
6  
7  
8  
9  
10  
11  
12  
13  
14  
15  
16  
17  
18  
19  
20  
21  
22  
23  
24  
25  
26  
27  
28  
29  
30  
31  
32  
33  
34  
35  
36  
37  
38  
39  
40  
41  
42  
43  
44  
45  
46  
47  
48  
49  
50  
51  
52  
53  
54  
55  
56  
57  
58  
59  
60

|         |                                                              |          |
|---------|--------------------------------------------------------------|----------|
| F496400 | Lesser eye: moderate VI, Better eye: unspecified             | Definite |
| F495500 | Lesser eye: near total VI, Better eye: near normal vision    | Definite |
| F495600 | Lesser eye: near total VI, Better eye: normal vision         | Definite |
| F495400 | Lesser eye: near total VI, Better eye: unspecified           | Definite |
| F495800 | Lesser eye: profound VI, Better eye: near normal vision      | Definite |
| F495900 | Lesser eye: profound VI, Better eye: normal vision           | Definite |
| F495700 | Lesser eye: profound VI, Better eye: unspecified             | Definite |
| F496200 | Lesser eye: severe VI, Better eye: near normal vision        | Definite |
| F496300 | Lesser eye: severe VI, Better eye: normal vision             | Definite |
| F496100 | Lesser eye: severe VI, Better eye: unspecified               | Definite |
| F495200 | Lesser eye: total VI, Better eye: near normal vision         | Definite |
| F495300 | Lesser eye: total VI, Better eye: normal vision              | Definite |
| F495100 | Lesser eye: total visual impairment, Better eye: unspecified | Definite |
| F49..12 | Low vision                                                   | Definite |
| F492.00 | Low vision, both eyes                                        | Definite |
| F492z00 | Low vision, both eyes NOS                                    | Definite |
| F492000 | Low vision, both eyes unspecified                            | Definite |
| F496.00 | Low vision, one eye                                          | Definite |
| F496z00 | Low vision, one eye NOS                                      | Definite |
| F496000 | Low vision, one eye, unspecified                             | Definite |
| F498.00 | Moderate visual impairment, binocular                        | Definite |
| F49C.00 | Moderate visual impairment, monocular                        | Definite |
| 2B7A.11 | O/E - blind L-eye                                            | Definite |
| 2B6A.11 | O/E - blind R-eye                                            | Definite |
| 22E6.11 | O/E - false eye                                              | Definite |
| 22E6.00 | O/E - glass (prosthetic) eye                                 | Definite |
| 22E6.12 | O/E - glass eye                                              | Definite |
| 22EF.00 | O/E - has one eye                                            | Definite |
| 2B7B.00 | O/E - L-eye completely blind                                 | Definite |
| 2B7C.00 | O/E - L-eye sees hand movements                              | Definite |
| 2B7T.00 | O/E - L-eye visual acuity (corrected) 1/60                   | Definite |
| 2B7V.00 | O/E - L-eye visual acuity (corrected) 2/60                   | Definite |
| 2B7W.00 | O/E - L-eye visual acuity (corrected) 4/60                   | Definite |
| 2B7X.00 | O/E - L-eye visual acuity (corrected) 5/60                   | Definite |
| 2B7S.00 | O/E - pinhole L-eye completely blind                         | Definite |
| 2B7Q.00 | O/E - pinhole L-eye counts fingers only                      | Definite |
| 2B7R.00 | O/E - pinhole L-eye perceives light only                     | Definite |
| 2B7P.00 | O/E - pinhole L-eye sees hand movements                      | Definite |
| 2B6S.00 | O/E - pinhole R-eye completely blind                         | Definite |
| 2B6Q.00 | O/E - pinhole R-eye counts fingers only                      | Definite |
| 2B6R.00 | O/E - pinhole R-eye perceives light only                     | Definite |
| 2B6P.00 | O/E - pinhole R-eye sees hand movements                      | Definite |
| 2B7L.00 | O/E - pinhole visual acuity L-eye=6/60                       | Definite |

|    |         |                                                             |          |
|----|---------|-------------------------------------------------------------|----------|
| 1  |         |                                                             |          |
| 2  |         |                                                             |          |
| 3  |         |                                                             |          |
| 4  | 2B6L.00 | O/E - pinhole visual acuity R-eye=6/60                      | Definite |
| 5  | 22E6.13 | O/E - prosthetic eye                                        | Definite |
| 6  | 2B6B.00 | O/E - R-eye completely blind                                | Definite |
| 7  | 2B6C.00 | O/E - R-eye sees hand movements                             | Definite |
| 8  | 2B6T.00 | O/E - R-eye visual acuity (corrected) 1/60                  | Definite |
| 9  | 2B6V.00 | O/E - R-eye visual acuity (corrected) 2/60                  | Definite |
| 10 | 2B6W.00 | O/E - R-eye visual acuity (corrected) 4/60                  | Definite |
| 11 | 2B6X.00 | O/E - R-eye visual acuity (corrected) 5/60                  | Definite |
| 12 | 2B7E.00 | O/E - visual acuity L-eye=3/60                              | Definite |
| 13 | 2B78.00 | O/E - visual acuity L-eye=6/60                              | Definite |
| 14 | 2B6E.00 | O/E - visual acuity R-eye=3/60                              | Definite |
| 15 | 2B68.00 | O/E - visual acuity R-eye=6/60                              | Definite |
| 16 | 2B79.00 | O/E -L-eye counts fingers only                              | Definite |
| 17 | 2B69.00 | O/E -R-eye counts fingers only                              | Definite |
| 18 | 2B7A.00 | O/E-L-eye perceives light only                              | Definite |
| 19 | 2B6A.00 | O/E-R-eye perceives light only                              | Definite |
| 20 | F491000 | One eye blind, one eye low vision                           | Definite |
| 21 | F491z00 | One eye blind, one eye low vision NOS                       | Definite |
| 22 | Z9E2.00 | Optical low vision aid provision                            | Definite |
| 23 | F49..13 | Partial sight                                               | Definite |
| 24 | F495z00 | Profound impairment one eye NOS                             | Definite |
| 25 | F495.00 | Profound impairment, one eye                                | Definite |
| 26 | Z96..00 | Provision for visual and hearing impairment                 | Definite |
| 27 | Z9E5400 | Provision of ancillary low vision aid                       | Definite |
| 28 | Z9E1100 | Provision of artificial eye                                 | Definite |
| 29 | Z962.00 | Provision of communicator for visual and hearing impairment | Definite |
| 30 | Z9E5100 | Provision of electronic low vision aid                      | Definite |
| 31 | Z961.00 | Provision of guide help for visual and hearing impairment   | Definite |
| 32 | Z9E3200 | Provision of low vision hand magnifier                      | Definite |
| 33 | Z9E3400 | Provision of low vision headband magnifier                  | Definite |
| 34 | Z9E3300 | Provision of low vision stand magnifier                     | Definite |
| 35 | Z9E3100 | Provision of magnifier low vision aid - near                | Definite |
| 36 | Z9E5.00 | Provision of non-optical low vision aid                     | Definite |
| 37 | Z9E4.00 | Provision of optical low vision aid - distance              | Definite |
| 38 | Z9E3.00 | Provision of optical low vision aid - near                  | Definite |
| 39 | Z9E1200 | Provision of removable artificial eye                       | Definite |
| 40 | Z9E3500 | Provision of spectacle low vision aid - near                | Definite |
| 41 | 8HIE.00 | Referral to visual impairment multidisciplinary team        | Definite |
| 42 | 6689    | Registered blind                                            | Definite |
| 43 | 6688.11 | Registered partially blind                                  | Definite |
| 44 | 6688    | Registered partially sighted                                | Definite |
| 45 | 6689.11 | Registered severely sight impaired                          | Definite |
| 46 | 668D.00 | Registered sight impaired                                   | Definite |
| 47 |         |                                                             |          |
| 48 |         |                                                             |          |
| 49 |         |                                                             |          |
| 50 |         |                                                             |          |
| 51 |         |                                                             |          |
| 52 |         |                                                             |          |
| 53 |         |                                                             |          |
| 54 |         |                                                             |          |
| 55 |         |                                                             |          |
| 56 |         |                                                             |          |
| 57 |         |                                                             |          |
| 58 |         |                                                             |          |
| 59 |         |                                                             |          |
| 60 |         |                                                             |          |

|    |         |                                                     |          |
|----|---------|-----------------------------------------------------|----------|
| 1  |         |                                                     |          |
| 2  |         |                                                     |          |
| 3  |         |                                                     |          |
| 4  | 8D36.00 | Removable artificial eye                            | Definite |
| 5  | 9Nfb.00 | Requires deafblind block alphabet interpreter       | Definite |
| 6  | 9NfB.00 | Requires deafblind communicator guide               | Definite |
| 7  | 9Nfc.00 | Requires deafblind haptic communication interpreter | Definite |
| 8  | 9Nfa.00 | Requires deafblind manual alphabet interpreter      | Definite |
| 9  |         |                                                     |          |
| 10 | F497.00 | Severe visual impairment, binocular                 | Definite |
| 11 | F49B.00 | Severe visual impairment, monocular                 | Definite |
| 12 |         |                                                     |          |
| 13 | F49..14 | Sight impaired                                      | Definite |
| 14 | F490000 | Unspecified blindness both eyes                     | Definite |
| 15 | 1a00000 | Uses guide dog for the blind                        | Definite |
| 16 | F49D.00 | Visual impairment                                   | Definite |
| 17 |         |                                                     |          |
| 18 | F493.00 | Visual loss, both eyes unqualified                  | Definite |
| 19 | F49y.00 | Visual loss, one eye, unqualified                   | Definite |
| 20 |         |                                                     |          |
| 21 | F404200 | Blind hypertensive eye                              | Definite |
| 22 | F404100 | Blind hypotensive eye                               | Definite |
| 23 | Z9E3900 | Near low vision aid - clip-on spectacle magnifier   | Definite |
| 24 | Z9E3C00 | Near low vision aid - clip-on spectacle telescope   | Definite |
| 25 | Z9E3D00 | Near low vision aid - extra cap for telescope       | Definite |
| 26 | Z9E3800 | Near low vision aid - integral spectacle magnifier  | Definite |
| 27 | Z9E3B00 | Near low vision aid - integral spectacle telescope  | Definite |
| 28 |         |                                                     |          |
| 29 | 9NID.00 | Seen by visual impairment teacher                   | Definite |
| 30 |         |                                                     |          |
| 31 | 1B75.00 | Loss of vision, Severe visual loss                  | Definite |
| 32 | 1B77.00 | Deteriorating vision, Severe visual loss            | Definite |
| 33 |         |                                                     |          |

### Unclassifiable

| Code    | Description                                                   |
|---------|---------------------------------------------------------------|
| 2BB5.00 | O/E - retinal haemorrhages                                    |
| 2BB6.00 | O/E - retinal exudates                                        |
| 2BBF.00 | Retinal abnormality-diabetes related                          |
| 2BBr.00 | Impaired vision due diab retinop                              |
| C105.00 | Diabetes mellitus with ophthalmic manifestation               |
| C105000 | Diabetes mellitus, juvenile type, + ophthalmic manifestation  |
| C105100 | Diabetes mellitus, adult onset, + ophthalmic manifestation    |
| C105y00 | Other specified diabetes mellitus with ophthalmic complicatn  |
| C105z00 | Diabetes mellitus NOS with ophthalmic manifestation           |
| C108100 | Insulin-dependent diabetes mellitus with ophthalmic comps     |
| C108111 | Type I diabetes mellitus with ophthalmic complications        |
| C108112 | Type 1 diabetes mellitus with ophthalmic complications        |
| C108700 | Insulin dependent diabetes mellitus with retinopathy          |
| C108711 | Type I diabetes mellitus with retinopathy                     |
| C108712 | Type 1 diabetes mellitus with retinopathy                     |
| C109100 | Non-insulin-dependent diabetes mellitus with ophthalmic comps |

|    |         |                                                               |
|----|---------|---------------------------------------------------------------|
| 1  |         |                                                               |
| 2  |         |                                                               |
| 3  |         |                                                               |
| 4  | C109111 | Type II diabetes mellitus with ophthalmic complications       |
| 5  | C109112 | Type 2 diabetes mellitus with ophthalmic complications        |
| 6  | C109600 | Non-insulin-dependent diabetes mellitus with retinopathy      |
| 7  | C109611 | Type II diabetes mellitus with retinopathy                    |
| 8  | C109612 | Type 2 diabetes mellitus with retinopathy                     |
| 9  |         |                                                               |
| 10 | C10A300 | Malnutrit-related diabetes mellitus with ophthalmic complicat |
| 11 | C10E100 | Type 1 diabetes mellitus with ophthalmic complications        |
| 12 | C10E111 | Type I diabetes mellitus with ophthalmic complications        |
| 13 | C10E112 | Insulin-dependent diabetes mellitus with ophthalmic comps     |
| 14 |         |                                                               |
| 15 | C10E700 | Type 1 diabetes mellitus with retinopathy                     |
| 16 | C10E711 | Type I diabetes mellitus with retinopathy                     |
| 17 | C10E712 | Insulin dependent diabetes mellitus with retinopathy          |
| 18 | C10F600 | Type 2 diabetes mellitus with retinopathy                     |
| 19 | C10F611 | Type II diabetes mellitus with retinopathy                    |
| 20 |         |                                                               |
| 21 | F420.00 | Diabetic retinopathy                                          |
| 22 | F420600 | Non proliferative diabetic retinopathy                        |
| 23 | F420z00 | Diabetic retinopathy NOS                                      |
| 24 | F421.11 | Microvascular retinal changes                                 |
| 25 |         |                                                               |
| 26 | 2BB5.00 | O/E - retinal haemorrhages                                    |
| 27 | 2BBM.00 | O/E - diabetic maculopathy absent both eyes                   |
| 28 |         |                                                               |
| 29 |         |                                                               |
| 30 |         |                                                               |
| 31 |         |                                                               |
| 32 |         |                                                               |
| 33 |         |                                                               |
| 34 |         |                                                               |
| 35 |         |                                                               |
| 36 |         |                                                               |
| 37 |         |                                                               |
| 38 |         |                                                               |
| 39 |         |                                                               |
| 40 |         |                                                               |
| 41 |         |                                                               |
| 42 |         |                                                               |
| 43 |         |                                                               |
| 44 |         |                                                               |
| 45 |         |                                                               |
| 46 |         |                                                               |
| 47 |         |                                                               |
| 48 |         |                                                               |
| 49 |         |                                                               |
| 50 |         |                                                               |
| 51 |         |                                                               |
| 52 |         |                                                               |
| 53 |         |                                                               |
| 54 |         |                                                               |
| 55 |         |                                                               |
| 56 |         |                                                               |
| 57 |         |                                                               |
| 58 |         |                                                               |
| 59 |         |                                                               |
| 60 |         |                                                               |

#### Appendix 4: Summary of Prevalence Trends 1998 to 2018

| Decade                            | Prevalence estimate at the start of the decade | Prevalence estimate at the end of the decade | Percentage increase in prevalence within the decade | Percentage increase in prevalence between the decades |
|-----------------------------------|------------------------------------------------|----------------------------------------------|-----------------------------------------------------|-------------------------------------------------------|
| <b>STR in T1DM in two decades</b> |                                                |                                              |                                                     |                                                       |
| 1998 to 2007                      | 8.15                                           | 17.57                                        | 216%                                                |                                                       |
| 2009 to 2018                      | 20.54                                          | 30.22                                        | 147%                                                | 371%                                                  |
| <b>STR in T2DM in two decades</b> |                                                |                                              |                                                     |                                                       |
| 1998 to 2007                      | 4.36                                           | 8.1                                          | 186%                                                |                                                       |
| 2009 to 2018                      | 9.01                                           | 11.15                                        | 124%                                                | 256%                                                  |
| <b>DR in T1DM in two decades</b>  |                                                |                                              |                                                     |                                                       |
| 1998 to 2007                      | 26.62                                          | 40.32                                        | 151%                                                |                                                       |
| 2009 to 2018                      | 45.39                                          | 57.75                                        | 127%                                                | 217%                                                  |
| <b>DR in T2DM in two decades</b>  |                                                |                                              |                                                     |                                                       |
| 1998 to 2007                      | 11.53                                          | 20.06                                        | 174%                                                |                                                       |
| 2009 to 2018                      | 23.7                                           | 32.64                                        | 138%                                                | 283%                                                  |
| <b>STR in DM in two decades</b>   |                                                |                                              |                                                     |                                                       |
| 1998 to 2007                      | 4.87                                           | 8.84                                         | 182%                                                |                                                       |
| 2009 to 2018                      | 9.86                                           | 12.48                                        | 127%                                                | 256%                                                  |
| <b>DR in DM in two decades</b>    |                                                |                                              |                                                     |                                                       |
| 1998 to 2007                      | 13.57                                          | 21.64                                        | 159%                                                |                                                       |
| 2009 to 2018                      | 25.3                                           | 34.39                                        | 136%                                                | 253%                                                  |
| <b>T1DM in two decades</b>        |                                                |                                              |                                                     |                                                       |
| 1998 to 2007                      | 0.31%                                          | 0.32%                                        | 104%                                                |                                                       |
| 2009 to 2018                      | 0.33%                                          | 0.41%                                        | 123%                                                | 132%                                                  |
| <b>T2DM in two decades</b>        |                                                |                                              |                                                     |                                                       |
| 1998 to 2007                      | 1.91%                                          | 3.65%                                        | 191%                                                |                                                       |
| 2009 to 2018                      | 4.01%                                          | 5.24%                                        | 131%                                                | 273%                                                  |

## Appendix 5: Future projections

In the four figures below, the grey area is the prediction band (95% confidence interval) and signifies the uncertainty of the estimates.

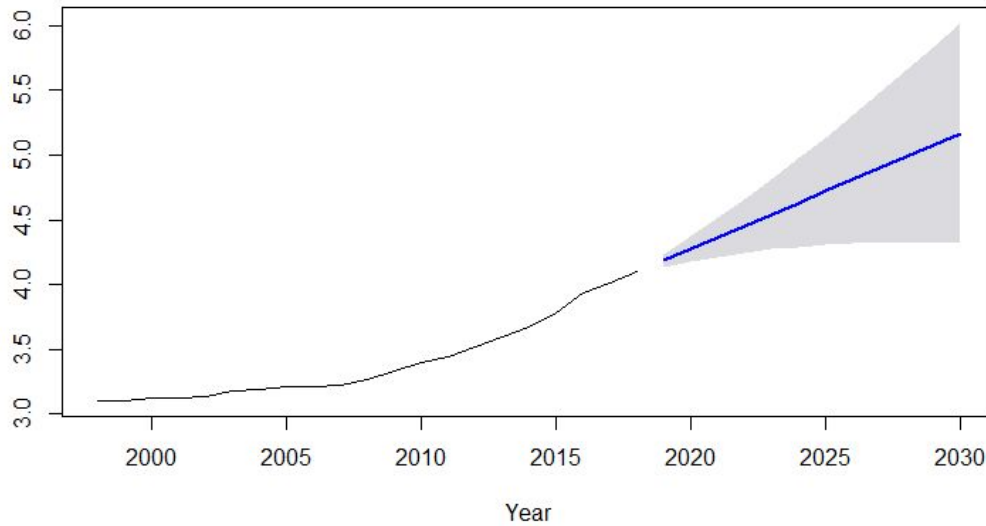

**Figure 1: T1DM Projections / 1000 individuals**

X axis is calendar years and Y axis is prevalence (cases per 1000 individuals general population), starts at 3.0

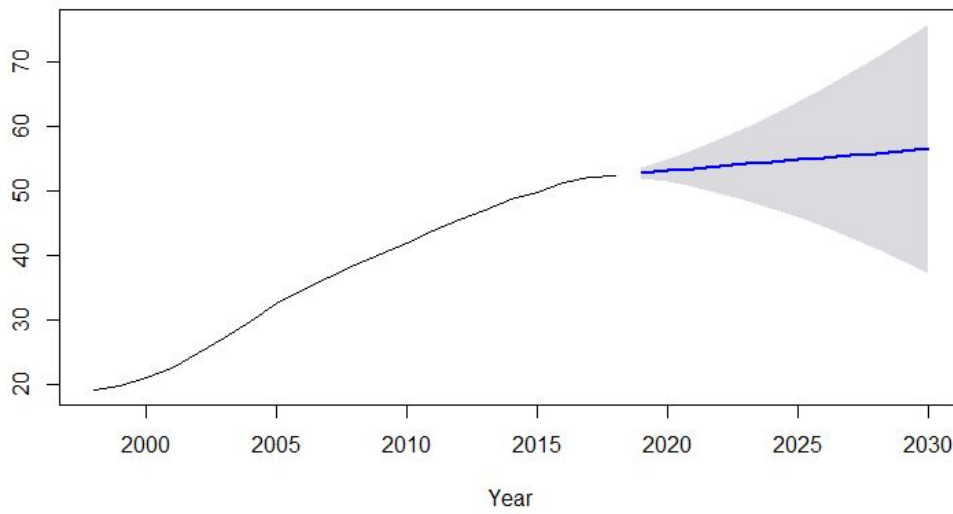

**Figure 2: T2DM Projections / 1000 individuals**

X axis is calendar years and Y axis is prevalence (cases per 1000 individuals general population) starts at 17

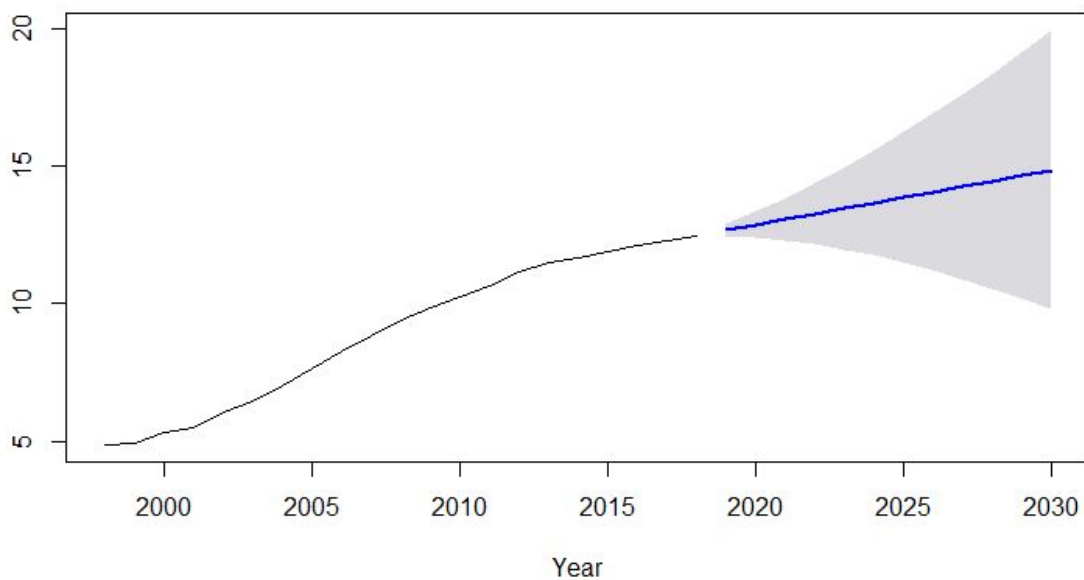

**Figure 3: STR Projections (%)**

X axis is calendar years and Y axis is prevalence (cases per 100 individuals with diabetes) starts at 4

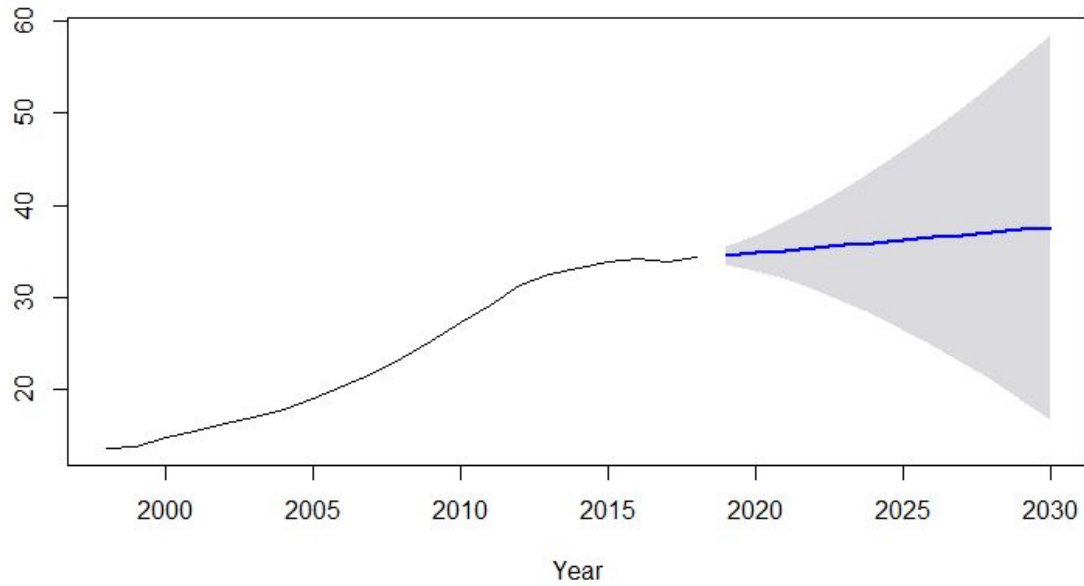

**Figure 4: DR Projections (%)**

X axis is calendar years and Y axis is prevalence (cases per 100 individuals with diabetes), starts at

10



Annual Prevalence Diabetes Mellitus per 1000 Population and Diabetic Retinopathy per 100 diabetic population (95% PI)

| Year | T1DM Forecast |        |         | T2DM Forecast |        |         | DR Forecast |        |         | STR Forecast |        |         |
|------|---------------|--------|---------|---------------|--------|---------|-------------|--------|---------|--------------|--------|---------|
|      | Forecast      | Low 95 | High 95 | Forecast      | Low 95 | High 95 | Forecast    | Low 95 | High 95 | Forecast     | Low 95 | High 95 |
| 2019 | 4.2           | 4.1    | 4.2     | 52.7          | 51.9   | 53.6    | 34.5        | 33.5   | 35.5    | 12.7         | 12.4   | 12.9    |
| 2020 | 4.3           | 4.2    | 4.4     | 53.1          | 51.4   | 54.8    | 34.8        | 32.9   | 36.7    | 12.9         | 12.4   | 13.3    |
| 2021 | 4.4           | 4.2    | 4.5     | 53.4          | 50.6   | 56.3    | 35.1        | 31.9   | 38.2    | 13.1         | 12.3   | 13.8    |
| 2022 | 4.5           | 4.2    | 4.7     | 53.8          | 49.6   | 57.9    | 35.4        | 30.8   | 39.9    | 13.3         | 12.2   | 14.4    |
| 2023 | 4.5           | 4.3    | 4.8     | 54.1          | 48.5   | 59.7    | 35.6        | 29.5   | 41.8    | 13.5         | 12.0   | 15.0    |
| 2024 | 4.6           | 4.3    | 5.0     | 54.4          | 47.2   | 61.6    | 35.9        | 28.1   | 43.8    | 13.7         | 11.8   | 15.6    |
| 2025 | 4.7           | 4.3    | 5.1     | 54.8          | 45.8   | 63.7    | 36.2        | 26.5   | 45.9    | 13.9         | 11.5   | 16.2    |
| 2026 | 4.8           | 4.3    | 5.3     | 55.1          | 44.3   | 65.9    | 36.5        | 24.7   | 48.2    | 14.1         | 11.2   | 16.9    |
| 2027 | 4.9           | 4.3    | 5.5     | 55.4          | 42.7   | 68.2    | 36.8        | 22.9   | 50.6    | 14.3         | 10.9   | 17.6    |
| 2028 | 5.0           | 4.3    | 5.7     | 55.8          | 41.0   | 70.6    | 37.0        | 20.9   | 53.2    | 14.5         | 10.5   | 18.4    |
| 2029 | 5.1           | 4.3    | 5.8     | 56.1          | 39.1   | 73.1    | 37.3        | 18.8   | 55.8    | 14.7         | 10.2   | 19.1    |
| 2030 | 5.2           | 4.3    | 6.0     | 56.4          | 37.2   | 75.7    | 37.6        | 16.7   | 58.5    | 14.9         | 9.8    | 19.9    |

## Appendix 6: Previous prevalence studies compared with IMRD based analysis

| Publication                        | Population                                                                                                                  | T1DM                                      | T2DM                                                                                           | Any DM                                                                                                              |
|------------------------------------|-----------------------------------------------------------------------------------------------------------------------------|-------------------------------------------|------------------------------------------------------------------------------------------------|---------------------------------------------------------------------------------------------------------------------|
| Younis et al (1)                   | Liverpool diabetic retinopathy screening programme 1991 to 1999 – baseline prevalence at entry into the programme           | Any DR<br>45.7%<br>STED 16.4%<br>PDR 3.7% | Any DR<br>25.3%<br>STED 6.0%<br>PDR 0.5%                                                       |                                                                                                                     |
| Misra et al (2)                    | Norwich Diabetic retinopathy screening programme 2006 with dynamic cohort design with repeated measures                     |                                           |                                                                                                | Any DR 25.6%<br>STDR 0.6%<br>PPDR 4.6%<br>PDR 0.08%<br>Maculopathy 0.44%<br>Referable (R2, R3, M1) retinopathy 4.7% |
| Thomas (3) and Minassian et al (4) | Welsh Diabetic retinopathy screening programme 2005 to 2009 and application to England                                      | Any DR 56.3%<br>STDR 11.2%                | Any DR 30.9%<br>STDR 2.9%                                                                      | Any DR 32.4%<br>STDR 3.4%<br>Diabetic Macular Oedema 7.12%                                                          |
| Looker et al (5)                   | Newly diagnosed type 2 diabetes attending Scottish National screening programme 2005 to 2008. prevalence at first screening |                                           | Any DR 19.3%<br>Referable DR 1.9%<br>PPDR ± any maculopathy 0.4%<br>PDR ± any maculopathy 0.3% |                                                                                                                     |

|                   |                                                       |                                                     |                                                    |                                                    |
|-------------------|-------------------------------------------------------|-----------------------------------------------------|----------------------------------------------------|----------------------------------------------------|
| Mathur et al (6)  | CPRD based UK wide study 2014 - crude prevalence rate | Any DR 54.8%<br>Severe DR 8.1%                      | Any DR 30.6%<br>Severe DR 1.2%                     | Any DR 32.6%<br>Severe DR 1.8%                     |
| The present study | IMRD based cross sectional study - 2017               | Any DR 57.8%<br>STR 30.2%<br>Any maculopathy 19.62% | Any DR 32.6%<br>STR 11.2%<br>Any maculopathy 6.99% | Any DR 34.4%<br>STR 12.3%<br>Any maculopathy 7.86% |

### References:

1. Younis N, Broadbent DM, Harding SP, Vora JR. Prevalence of diabetic eye disease in patients entering a systematic primary care-based eye screening programme. *Diabetic medicine : a journal of the British Diabetic Association*. 2002;19(12):1014-21.
2. Misra A, Bachmann MO, Greenwood RH, Jenkins C, Shaw A, Barakat O, et al. Trends in yield and effects of screening intervals during 17 years of a large UK community-based diabetic retinopathy screening programme. *Diabetic medicine : a journal of the British Diabetic Association*. 2009;26(10):1040-7.
3. Thomas RL, Dunstan FD, Luzio SD, Chowdhury SR, North RV, Hale SL, et al. Prevalence of diabetic retinopathy within a national diabetic retinopathy screening service. *The British journal of ophthalmology*. 2015;99(1):64-8.
4. Minassian DC, Owens DR, Reidy A. Prevalence of diabetic macular oedema and related health and social care resource use in England. *The British journal of ophthalmology*. 2012;96(3):345-9.
5. Looker H, Nyangoma S, Cromie D, Olson J, Leese G, Black M, et al. Diabetic retinopathy at diagnosis of type 2 diabetes in Scotland. *Diabetologia*. 2012;55(9):2335-42.
6. Mathur R, Bhaskaran K, Edwards E, Lee H, Chaturvedi N, Smeeth L, et al. Population trends in the 10-year incidence and prevalence of diabetic retinopathy in the UK: a cohort study in the Clinical Practice Research Datalink 2004-2014. *BMJ open*. 2017;7(2):e014444.

## Appendix 7: Previous publications reporting trends in prevalence rates of DR in the UK compared with IMRD based analysis

| Publication      | Population                                                                                                                      | T1DM                                                                                       | T2DM                                                                                                            | Any DM                                                                                       |
|------------------|---------------------------------------------------------------------------------------------------------------------------------|--------------------------------------------------------------------------------------------|-----------------------------------------------------------------------------------------------------------------|----------------------------------------------------------------------------------------------|
| Misra et al (1)  | Norwich Diabetic retinopathy screening programme 1990 to 2006 (Mostly Type 2) with dynamic cohort design with repeated measures |                                                                                            |                                                                                                                 | All DR prevalence increased from 23.2% to 25.3%<br><br>Referable DR increased from 2 to 4.7% |
| Mathur et al (2) | CPRD based UK wide study population from 2004 to 2014                                                                           | All DR remained stable at 55%<br><br>Severe DR increased from 3.5% in 2004 to 8.0% in 2014 | All DR reduced from 24.6% in 2004 to 23.1% in 2014<br><br>Severe DR increased from 0.3% in 2004 to 0.9% in 2014 | All DR prevalence decreased from 2.6% to 2.2%<br><br>Severe DR remained stable at 0.1%       |
| This study       | IMRD based serial cross-sectional studies 1998 to 2018                                                                          |                                                                                            |                                                                                                                 |                                                                                              |

### References:

1. Misra A, Bachmann MO, Greenwood RH, Jenkins C, Shaw A, Barakat O, et al. Trends in yield and effects of screening intervals during 17 years of a large UK community-based diabetic retinopathy screening programme. *Diabetic medicine : a journal of the British Diabetic Association.* 2009;26(10):1040-7.
2. Mathur R, Bhaskaran K, Edwards E, Lee H, Chaturvedi N, Smeeth L, et al. Population trends in the 10-year incidence and prevalence of diabetic retinopathy in the UK: a cohort study in the Clinical Practice Research Datalink 2004-2014. *BMJ open.* 2017;7(2):e014444.

# Reporting checklist for cross sectional study.

Based on the STROBE cross sectional guidelines.

## Instructions to authors

Complete this checklist by entering the page numbers from your manuscript where readers will find each of the items listed below.

Your article may not currently address all the items on the checklist. Please modify your text to include the missing information. If you are certain that an item does not apply, please write "n/a" and provide a short explanation.

Upload your completed checklist as an extra file when you submit to a journal.

In your methods section, say that you used the STROBE cross sectional reporting guidelines, and cite them as:

von Elm E, Altman DG, Egger M, Pocock SJ, Gotsche PC, Vandenbroucke JP. The Strengthening the Reporting of Observational Studies in Epidemiology (STROBE) Statement: guidelines for reporting observational studies.

|                           | Reporting Item                                                                                                      | Page Number |
|---------------------------|---------------------------------------------------------------------------------------------------------------------|-------------|
| <b>Title and abstract</b> |                                                                                                                     |             |
| Title                     | <a href="#">#1a</a> Indicate the study's design with a commonly used term in the title or the abstract              | 2           |
| Abstract                  | <a href="#">#1b</a> Provide in the abstract an informative and balanced summary of what was done and what was found | 2           |

|    |                      |                     |                                                            |      |
|----|----------------------|---------------------|------------------------------------------------------------|------|
| 1  | <b>Introduction</b>  |                     |                                                            |      |
| 2  |                      |                     |                                                            |      |
| 3  |                      |                     |                                                            |      |
| 4  | Background /         | <a href="#">#2</a>  | Explain the scientific background and rationale for the    | 4,5  |
| 5  | rationale            |                     | investigation being reported                               |      |
| 6  |                      |                     |                                                            |      |
| 7  |                      |                     |                                                            |      |
| 8  |                      |                     |                                                            |      |
| 9  | Objectives           | <a href="#">#3</a>  | State specific objectives, including any prespecified      | 5    |
| 10 |                      |                     | hypotheses                                                 |      |
| 11 |                      |                     |                                                            |      |
| 12 |                      |                     |                                                            |      |
| 13 |                      |                     |                                                            |      |
| 14 |                      |                     |                                                            |      |
| 15 | <b>Methods</b>       |                     |                                                            |      |
| 16 |                      |                     |                                                            |      |
| 17 |                      |                     |                                                            |      |
| 18 | Study design         | <a href="#">#4</a>  | Present key elements of study design early in the paper    | 2    |
| 19 |                      |                     |                                                            |      |
| 20 |                      |                     |                                                            |      |
| 21 | Setting              | <a href="#">#5</a>  | Describe the setting, locations, and relevant dates,       | 5-9  |
| 22 |                      |                     | including periods of recruitment, exposure, follow-up,     |      |
| 23 |                      |                     | and data collection                                        |      |
| 24 |                      |                     |                                                            |      |
| 25 |                      |                     |                                                            |      |
| 26 |                      |                     |                                                            |      |
| 27 |                      |                     |                                                            |      |
| 28 |                      |                     |                                                            |      |
| 29 | Eligibility criteria | <a href="#">#6a</a> | Give the eligibility criteria, and the sources and methods | 6-7  |
| 30 |                      |                     | of selection of participants.                              |      |
| 31 |                      |                     |                                                            |      |
| 32 |                      |                     |                                                            |      |
| 33 |                      |                     |                                                            |      |
| 34 |                      | <a href="#">#7</a>  | Clearly define all outcomes, exposures, predictors,        | NA   |
| 35 |                      |                     | potential confounders, and effect modifiers. Give          |      |
| 36 |                      |                     | diagnostic criteria, if applicable                         |      |
| 37 |                      |                     |                                                            |      |
| 38 |                      |                     |                                                            |      |
| 39 |                      |                     |                                                            |      |
| 40 |                      |                     |                                                            |      |
| 41 |                      |                     |                                                            |      |
| 42 | Data sources /       | <a href="#">#8</a>  | For each variable of interest give sources of data and     | NA   |
| 43 | measurement          |                     | details of methods of assessment (measurement).            |      |
| 44 |                      |                     | Describe comparability of assessment methods if there      |      |
| 45 |                      |                     | is more than one group. Give information separately for    |      |
| 46 |                      |                     | for exposed and unexposed groups if applicable.            |      |
| 47 |                      |                     |                                                            |      |
| 48 |                      |                     |                                                            |      |
| 49 |                      |                     |                                                            |      |
| 50 |                      |                     |                                                            |      |
| 51 |                      |                     |                                                            |      |
| 52 |                      |                     |                                                            |      |
| 53 |                      |                     |                                                            |      |
| 54 | Bias                 | <a href="#">#9</a>  | Describe any efforts to address potential sources of bias  | 5, 6 |
| 55 |                      |                     |                                                            |      |
| 56 |                      |                     |                                                            |      |
| 57 |                      |                     |                                                            |      |
| 58 |                      |                     |                                                            |      |
| 59 |                      |                     |                                                            |      |
| 60 |                      |                     |                                                            |      |

|    |                |                      |                                                            |              |
|----|----------------|----------------------|------------------------------------------------------------|--------------|
| 1  | Study size     | <a href="#">#10</a>  | Explain how the study size was arrived at                  | All eligible |
| 2  |                |                      |                                                            | patients     |
| 3  |                |                      |                                                            | included     |
| 4  |                |                      |                                                            |              |
| 5  |                |                      |                                                            |              |
| 6  |                |                      |                                                            |              |
| 7  |                |                      |                                                            |              |
| 8  |                |                      |                                                            |              |
| 9  | Quantitative   | <a href="#">#11</a>  | Explain how quantitative variables were handled in the     | 7            |
| 10 | variables      |                      | analyses. If applicable, describe which groupings were     |              |
| 11 |                |                      | chosen, and why                                            |              |
| 12 |                |                      |                                                            |              |
| 13 |                |                      |                                                            |              |
| 14 |                |                      |                                                            |              |
| 15 |                |                      |                                                            |              |
| 16 | Statistical    | <a href="#">#12a</a> | Describe all statistical methods, including those used to  | NA           |
| 17 | methods        |                      | control for confounding                                    |              |
| 18 |                |                      |                                                            |              |
| 19 |                |                      |                                                            |              |
| 20 |                |                      |                                                            |              |
| 21 |                |                      |                                                            |              |
| 22 | Statistical    | <a href="#">#12b</a> | Describe any methods used to examine subgroups and         | NA           |
| 23 | methods        |                      | interactions                                               |              |
| 24 |                |                      |                                                            |              |
| 25 |                |                      |                                                            |              |
| 26 |                |                      |                                                            |              |
| 27 | Statistical    | <a href="#">#12c</a> | Explain how missing data were addressed                    | NA           |
| 28 | methods        |                      |                                                            |              |
| 29 |                |                      |                                                            |              |
| 30 |                |                      |                                                            |              |
| 31 |                |                      |                                                            |              |
| 32 | Statistical    | <a href="#">#12d</a> | If applicable, describe analytical methods taking account  | NA           |
| 33 | methods        |                      | of sampling strategy                                       |              |
| 34 |                |                      |                                                            |              |
| 35 |                |                      |                                                            |              |
| 36 |                |                      |                                                            |              |
| 37 |                |                      |                                                            |              |
| 38 | Statistical    | <a href="#">#12e</a> | Describe any sensitivity analyses                          | NA           |
| 39 | methods        |                      |                                                            |              |
| 40 |                |                      |                                                            |              |
| 41 |                |                      |                                                            |              |
| 42 |                |                      |                                                            |              |
| 43 | <b>Results</b> |                      |                                                            |              |
| 44 |                |                      |                                                            |              |
| 45 |                |                      |                                                            |              |
| 46 | Participants   | <a href="#">#13a</a> | Report numbers of individuals at each stage of study—      | Figure 1     |
| 47 |                |                      | eg numbers potentially eligible, examined for eligibility, |              |
| 48 |                |                      | confirmed eligible, included in the study, completing      |              |
| 49 |                |                      | follow-up, and analysed. Give information separately for   |              |
| 50 |                |                      | for exposed and unexposed groups if applicable.            |              |
| 51 |                |                      |                                                            |              |
| 52 |                |                      |                                                            |              |
| 53 |                |                      |                                                            |              |
| 54 |                |                      |                                                            |              |
| 55 |                |                      |                                                            |              |
| 56 |                |                      |                                                            |              |
| 57 |                |                      |                                                            |              |
| 58 |                |                      |                                                            |              |
| 59 |                |                      |                                                            |              |
| 60 |                |                      |                                                            |              |

|    |                  |                      |                                                              |          |
|----|------------------|----------------------|--------------------------------------------------------------|----------|
| 1  | Participants     | <a href="#">#13b</a> | Give reasons for non-participation at each stage             | Figure 1 |
| 2  |                  |                      |                                                              |          |
| 3  |                  |                      |                                                              |          |
| 4  | Participants     | <a href="#">#13c</a> | Consider use of a flow diagram                               | Figure 1 |
| 5  |                  |                      |                                                              |          |
| 6  |                  |                      |                                                              |          |
| 7  | Descriptive data | <a href="#">#14a</a> | Give characteristics of study participants (eg               | Table 1  |
| 8  |                  |                      | demographic, clinical, social) and information on            |          |
| 9  |                  |                      | exposures and potential confounders. Give information        |          |
| 10 |                  |                      | separately for exposed and unexposed groups if               |          |
| 11 |                  |                      | applicable.                                                  |          |
| 12 |                  |                      |                                                              |          |
| 13 |                  |                      |                                                              |          |
| 14 |                  |                      |                                                              |          |
| 15 |                  |                      |                                                              |          |
| 16 |                  |                      |                                                              |          |
| 17 |                  |                      |                                                              |          |
| 18 |                  |                      |                                                              |          |
| 19 | Descriptive data | <a href="#">#14b</a> | Indicate number of participants with missing data for        | Table 1  |
| 20 |                  |                      | each variable of interest                                    |          |
| 21 |                  |                      |                                                              |          |
| 22 |                  |                      |                                                              |          |
| 23 |                  |                      |                                                              |          |
| 24 |                  |                      |                                                              |          |
| 25 | Outcome data     | <a href="#">#15</a>  | Report numbers of outcome events or summary                  | Table 3  |
| 26 |                  |                      | measures. Give information separately for exposed and        |          |
| 27 |                  |                      | unexposed groups if applicable.                              |          |
| 28 |                  |                      |                                                              |          |
| 29 |                  |                      |                                                              |          |
| 30 |                  |                      |                                                              |          |
| 31 |                  |                      |                                                              |          |
| 32 | Main results     | <a href="#">#16a</a> | Give unadjusted estimates and, if applicable,                | NA       |
| 33 |                  |                      | confounder-adjusted estimates and their precision (eg,       |          |
| 34 |                  |                      | 95% confidence interval). Make clear which confounders       |          |
| 35 |                  |                      | were adjusted for and why they were included                 |          |
| 36 |                  |                      |                                                              |          |
| 37 |                  |                      |                                                              |          |
| 38 |                  |                      |                                                              |          |
| 39 |                  |                      |                                                              |          |
| 40 |                  |                      |                                                              |          |
| 41 |                  |                      |                                                              |          |
| 42 | Main results     | <a href="#">#16b</a> | Report category boundaries when continuous variables         | NA       |
| 43 |                  |                      | were categorized                                             |          |
| 44 |                  |                      |                                                              |          |
| 45 |                  |                      |                                                              |          |
| 46 |                  |                      |                                                              |          |
| 47 |                  |                      |                                                              |          |
| 48 | Main results     | <a href="#">#16c</a> | If relevant, consider translating estimates of relative risk | NA       |
| 49 |                  |                      | into absolute risk for a meaningful time period              |          |
| 50 |                  |                      |                                                              |          |
| 51 |                  |                      |                                                              |          |
| 52 |                  |                      |                                                              |          |
| 53 | Other analyses   | <a href="#">#17</a>  | Report other analyses done—e.g., analyses of                 | NA       |
| 54 |                  |                      | subgroups and interactions, and sensitivity analyses         |          |
| 55 |                  |                      |                                                              |          |
| 56 |                  |                      |                                                              |          |
| 57 |                  |                      |                                                              |          |
| 58 |                  |                      |                                                              |          |
| 59 |                  |                      |                                                              |          |
| 60 |                  |                      |                                                              |          |



1 **Discussion**

2

3

4 Key results [#18](#) Summarise key results with reference to study 16 - 18

5 objectives

6

7

8

9

10 Limitations [#19](#) Discuss limitations of the study, taking into account 18 - 20

11 sources of potential bias or imprecision. Discuss both

12 direction and magnitude of any potential bias.

13

14

15

16

17 Interpretation [#20](#) Give a cautious overall interpretation considering 19 – 20,

18 objectives, limitations, multiplicity of analyses, results appendices 6,

19 from similar studies, and other relevant evidence. 7

20

21

22

23

24

25 Generalisability [#21](#) Discuss the generalisability (external validity) of the 21 - 22

26 study results

27

28

29

30 **Other Information**

31

32

33 Funding [#22](#) Give the source of funding and the role of the funders for NA

34 the present study and, if applicable, for the original study

35 on which the present article is based

36

37

38

39

40

41 None The STROBE checklist is distributed under the terms of the Creative Commons Attribution

42 License CC-BY. This checklist can be completed online using <https://www.goodreports.org/>, a tool

43 made by the [EQUATOR Network](#) in collaboration with [Penelope.ai](#)

44

45

46

47

48

49

50

51

52

53

54

55

56

57

58

59

60

# BMJ Open

## Disease burden of diabetes, diabetic retinopathy and their future projections in the United Kingdom: Cross sectional analyses of a primary care database.

|                                 |                                                                                                                                                                                                                                                                                                                                                                                                                                                                                                                                                                                                                            |
|---------------------------------|----------------------------------------------------------------------------------------------------------------------------------------------------------------------------------------------------------------------------------------------------------------------------------------------------------------------------------------------------------------------------------------------------------------------------------------------------------------------------------------------------------------------------------------------------------------------------------------------------------------------------|
| Journal:                        | <i>BMJ Open</i>                                                                                                                                                                                                                                                                                                                                                                                                                                                                                                                                                                                                            |
| Manuscript ID                   | bmjopen-2021-050058.R1                                                                                                                                                                                                                                                                                                                                                                                                                                                                                                                                                                                                     |
| Article Type:                   | Original research                                                                                                                                                                                                                                                                                                                                                                                                                                                                                                                                                                                                          |
| Date Submitted by the Author:   | 15-May-2021                                                                                                                                                                                                                                                                                                                                                                                                                                                                                                                                                                                                                |
| Complete List of Authors:       | haider, sajjad; University of Birmingham, Institute Of Applied Health Research<br>Thayakaran, Rasiah; University of Birmingham, Institute of Applied Health Research<br>Subramanian, Anuradha; University of Birmingham, Institute Of Applied Health Research<br>Toulis, Konstantinos A; University of Birmingham, Institute Of Applied Health Research<br>Moore, David; University of Birmingham, Institute Of Applied Health Research<br>Price, Malcolm; University of Birmingham, Institute Of Applied Health Research<br>Nirantharakumar, Krishnarajah; University of Birmingham, Institute Of Applied Health Research |
| <b>Primary Subject Heading</b>: | Ophthalmology                                                                                                                                                                                                                                                                                                                                                                                                                                                                                                                                                                                                              |
| Secondary Subject Heading:      | Diabetes and endocrinology                                                                                                                                                                                                                                                                                                                                                                                                                                                                                                                                                                                                 |
| Keywords:                       | Diabetic retinopathy < DIABETES & ENDOCRINOLOGY, OPHTHALMOLOGY, EPIDEMIOLOGY, Medical retina < OPHTHALMOLOGY                                                                                                                                                                                                                                                                                                                                                                                                                                                                                                               |
|                                 |                                                                                                                                                                                                                                                                                                                                                                                                                                                                                                                                                                                                                            |

SCHOLARONE™  
Manuscripts



I, the Submitting Author has the right to grant and does grant on behalf of all authors of the Work (as defined in the below author licence), an exclusive licence and/or a non-exclusive licence for contributions from authors who are: i) UK Crown employees; ii) where BMJ has agreed a CC-BY licence shall apply, and/or iii) in accordance with the terms applicable for US Federal Government officers or employees acting as part of their official duties; on a worldwide, perpetual, irrevocable, royalty-free basis to BMJ Publishing Group Ltd ("BMJ") its licensees and where the relevant Journal is co-owned by BMJ to the co-owners of the Journal, to publish the Work in this journal and any other BMJ products and to exploit all rights, as set out in our [licence](#).

The Submitting Author accepts and understands that any supply made under these terms is made by BMJ to the Submitting Author unless you are acting as an employee on behalf of your employer or a postgraduate student of an affiliated institution which is paying any applicable article publishing charge ("APC") for Open Access articles. Where the Submitting Author wishes to make the Work available on an Open Access basis (and intends to pay the relevant APC), the terms of reuse of such Open Access shall be governed by a Creative Commons licence – details of these licences and which [Creative Commons](#) licence will apply to this Work are set out in our licence referred to above.

Other than as permitted in any relevant BMJ Author's Self Archiving Policies, I confirm this Work has not been accepted for publication elsewhere, is not being considered for publication elsewhere and does not duplicate material already published. I confirm all authors consent to publication of this Work and authorise the granting of this licence.

1

2  
3  
4  
5 **Disease burden of diabetes, diabetic retinopathy and their future**  
6  
7 **Projections in the United Kingdom: Cross sectional analyses of a**  
8  
9 **primary care database. .**  
10  
11

12 Sajjad Haider<sup>1</sup>, Rasiah Thayakaran<sup>1</sup>, Anuradha Subramanian<sup>1</sup>, Konstantinos A  
13 Toulis<sup>1</sup>, David Moore<sup>\*2</sup>, Malcolm James Price<sup>\*2</sup>, Krishnarajah Nirantharakumar<sup>\*2</sup>

- 14  
15  
16 1. Institute of Applied Health Research, University of Birmingham  
17  
18 2. \*Joint Senior Authors Institute of Applied Health Research, University of  
19 Birmingham, Birmingham, United Kingdom  
20  
21  
22

23 **Joint Corresponding authors:**

24 Sajjad Haider, Postdoctoral Researcher, Institute of Applied Health Research,  
25 University of Birmingham, Birmingham, United Kingdom  
26  
27 E mail: [S.Haider.2@bham.ac.uk](mailto:S.Haider.2@bham.ac.uk)  
28  
29

30  
31 Krishnarajah Nirantharakumar, Institute of Applied Health Research, University of  
32 Birmingham, Birmingham, United Kingdom  
33  
34

35 E mail: [K.Nirantharan@bham.ac.uk](mailto:K.Nirantharan@bham.ac.uk)  
36  
37  
38  
39

40 **Key words**

41  
42  
43 Diabetes Mellitus, Diabetic Retinopathy, Current Disease Burden, Future Projections  
44  
45  
46  
47  
48  
49  
50  
51  
52  
53  
54  
55  
56  
57  
58  
59  
60

2

## Abstract

### Objectives

To estimate the current disease burden, trends, and future projections for Diabetes Mellitus (DM) and Diabetic Retinopathy in the IQVIA Medical Research Data (IMRD).

### Participants / Design / Setting

We performed a cross-sectional study of patients aged 12 and above to determine the prevalence of Diabetes Mellitus (DM) and Diabetic Retinopathy from the IMRD database (primary care database) in January 2017, involving a total population of 180,824 patients with DM. We also carried out a series of cross-sectional studies to investigate prevalence trends, and then applied a double exponential smoothing model to forecast the future burden of Diabetes Mellitus and Diabetic Retinopathy in the United Kingdom.

### Results

The crude Diabetes Mellitus prevalence in 2017 was 5.2%. The Diabetic Retinopathy, Sight Threatening Retinopathy (STR) and Diabetic Maculopathy prevalence figures in 2017 were 33.78%, 12.28% and 7.86% respectively in our IMRD cross-sectional study. There were upward trends in the prevalence of Diabetes Mellitus, Diabetic Retinopathy, and Sight-threatening retinopathy, most marked and accelerating in Sight-threatening retinopathy in type 1 Diabetes Mellitus (T1DM) but slowing in type 2 Diabetes Mellitus (T2DM), and in the overall prevalence of Diabetic Retinopathy.

### Conclusion

3

Our results suggest differential rising trends in the prevalence of Diabetes Mellitus and diabetic retinopathy. Preventive strategies, as well as treatment services planning can be based on these projected prevalence estimates. Improvements that are necessary for the optimisation of care pathways, and preparations to meet demand and capacity challenges, can also be based on this information. The limitations of the study can be overcome by a future collaborative study linking Diabetic Retinopathy (DR) screening and hospital eye services data.

#### **Article Summary: Strengths and limitations of this study**

- This is an up-to-date study to give DM and Diabetic Retinopathy prevalence trends from 1998 to 2018.
- This study forecasts the future Diabetic Retinopathy disease burden up to 2030 to enable preparation for impending challenges.
- Current prevalence of age 12 and over, diagnosed DM, DR, STR, Diabetic Macular Oedema disease and treatment burden in United Kingdom.
- This study has not however been adjusted for the risk factors for the incidence/prevalence of Diabetes Mellitus or Diabetic Retinopathy.
- A possible impact of coding errors and subjectivity in documentation cannot be precluded.

4

## Introduction

DR is the fourth most common cause of blindness and visual impairment in high-income countries (1). Services are overburdened and optimisation requires accurate estimates of disease and the expected treatment burden (2). A recent systematic review of studies estimating the incidence of DR (3) highlighted the paucity of contemporary evidence from developed countries on the disease burden and recommended that estimates should be based on populations with Diabetes Mellitus (DM) rather than the general population so as not to dilute the estimates. A recent attempt to forecast the UK-wide disease burden of DR was hindered by the need for reliable data (4).

Previous studies have been conducted on the prevalence of DR (5-9), with the most recent UK-wide study being performed in 2014 based on Clinical Practice Research Datalink (CPRD). Two of these studies also explored trends in DR incidence and prevalence (6, 9). A significant amount of heterogeneity in the populations studied, the classification of DR, the definition of its presence and severity was present in these studies. Studies of the forecasts of the future disease burden of DR would be useful both for preparing health care delivery systems for the future, and in preventing blindness in patients with DM. There is a Europe wide forecast study with UK component based on pre 2009 data dealing with DR only (10). The disease burden estimate of DR will not be complete without a similar estimate for the diabetes burden. A UK wide upto date study dealing with DM, DR and STR is needed.

A previous study on future projections of DM in the United Kingdom was found to underestimate prevalence (11). Moreover, evidence suggests that the rate of

5

1  
2  
3  
4 increase is not constant or uniform across DM subtypes (namely T2DM and T1DM,  
5 especially in children (12). The incidence rate of T1DM (pooled estimate of European  
6 centres, UK included) in children is expected to continue to rise at a rate of 3.4% per  
7 annum (13). Gonzalez et al (14) reported an increasing prevalence of DM for the 10  
8 years up to 2005. Public Health England (PHE) figures are available for 2019, based  
9 on the Quality Outcome Framework, except in Scotland where they are based on  
10 Scottish Diabetes Survey (15). However, these figures are limited to those over 17  
11 years old. We aimed to estimate recent trends in the disease burden of DM, and to  
12 use this as a base on which to estimate the current disease burden for DR and STR  
13 in the UK. We then wanted to design, train, and validate a forecasting model to  
14 support future projections of these disease burdens. Since DR screening is offered  
15 after age 12 only, the population of interest to us was age 12 or over only.

## 31 **Methods**

### 33 **Study design and data source**

34  
35 Several studies have already been performed on IMRD (previously The Health  
36 Improvement Network) and their findings have been extrapolated to UK and  
37 European population (16-21). This database has documented generalisability to the  
38 UK population (22).

39  
40  
41  
42 To study the trend, and to forecast the future burden of diagnosed DM, DR and STR,  
43 we used the IMRD database to conduct a series of yearly cross-sectional analyses  
44 on the 1<sup>st</sup> of each year from 1998 to 2018. In addition, a detailed cross-sectional  
45  
46  
47  
48  
49  
50  
51  
52  
53  
54  
55  
56  
57  
58  
59  
60



6

1  
2  
3  
4 study was carried out on the 1<sup>st</sup> of January 2017 to estimate the prevalence of T1DM  
5 and T2DM in the whole UK population, and of DR in patients with T1DM and T2DM.  
6  
7

8  
9 IMRD is a large UK general practice electronic database containing anonymised  
10 patient records from 787 general practices, with over 15 million patient records, of  
11 which around 3.7 million are active at a given time point (6.2% of the UK population).  
12 IMRD provides information on demographics, lifestyle, diagnoses, and prescriptions,  
13 and is quality checked (23). Based on the demographic distribution observed in  
14 IMRD, it is considered generalizable to the UK population (22). IMRD has previously  
15 been used and validated to estimate prevalence trends of DM and DR, and to identify  
16 risk factors for DR (14, 24-27).  
17  
18  
19  
20  
21  
22  
23  
24  
25  
26  
27

### 28 **Study population**

29  
30 To ensure that only high quality data was included, and that all important covariates  
31 were documented, general practices were eligible only if they showed acceptable  
32 mortality rates one year before the cross-sectional study date (23), and had been  
33 using the electronic medical record system for at least a year. Patients from eligible  
34 general practices must have been registered with their practice for at least one year  
35 and must be aged 12 years or above to be included in the study to match the  
36 Diabetic Eye Screening Programme criteria (DESP). For estimation of the prevalence  
37 of T1DM and T2DM, the whole registered population was included as the  
38 denominator population (per 1000). For estimation of STR and DR prevalence,  
39 patients with DM served as the denominator (per 100). Estimates are stratified by  
40 type of diabetes.  
41  
42  
43  
44  
45  
46  
47  
48  
49  
50  
51  
52  
53  
54  
55

### 56 **Patient and public involvement:**

57  
58 There was no patient and public involvement in this research project.  
59  
60

7

## Case definition of diagnoses of DM and DR

Clinical diagnosis and symptoms in the IMRD database are recorded using the Read code classification system (28). Read codes were selected using a rigorous seven step process and selected search terms (Appendix 1, 2). Read codes are given in Appendix 3. Patients with a Read code record of DM before the study entry date were identified. Patients with a record of DM were categorised as type 1 if they had at least one prescription record for insulin and no record for any oral glucose-lowering medication other than metformin in the database. The remaining patients with diabetes were categorized as type 2. Prevalence estimates calculated were verified against PHE estimates of DM (29).

The most severe DR Read code recorded before patient's study entry was used to classify their DR or STR status. Stages of DR among those patients identified with DM were classified using the Royal College of Ophthalmology modified classification (30). However, patients with a retinopathy record were stratified into mutually exclusive categories of 1) Pre-STR including no retinopathy and background retinopathy, 2) STR and 3) Retinopathy unspecified as either pre-STR (background retinopathy) or STR. Pre-STR was further categorized into mutually exclusive categories: 1) R0 or 2) R1. STR was further categorized into mutually exclusive categories of 1) STR based on diagnostic codes and 2) STR that needed treatment or resulted in vision loss. Within STR we categorised pre-proliferative DR (R2) and proliferative DR (R3) as mutually exclusive groups. STR was further stratified into overlapping categories based on the presence of STR (R2/3) and maculopathy (M1). Treatment and vision loss codes included: (i) laser therapy, (ii) vitreous injection and other vitreous procedures, (iii) low vision or blindness.

8

### **Time trend analysis and forecasting models**

A double exponential smoothing model was chosen to cover the level and trend, as this was yearly cross-sectional data with no seasonal / cyclical variation expected or observed (31) not unlike Adams et al published model (32). The IMRD serial cross-sectional data for the prevalence of DM and DR (STR and any retinopathy) were split into two portions - 1998 to 2013 (training data) and 2014 to 2018 (test data). The model was fitted to the training data and then prediction was carried out from 2014 to 2018. This was then compared with the test data for validation. Thereafter, the yearly prevalence of DR and STR were projected up to 2030 using the same model with 95% prediction intervals. This was done using the statistical software R (2019) (33). Prevalence rates were then converted into patient numbers, using projected population figures from the Office of National Statistics (34).

### **IMRD data analysis for annual prevalence of DM and DR.**

Prevalence trends between the two decades before and after 2008 were compared for trend analysis. Patients identified as T1DM or T2DM on or before 1<sup>st</sup> of January in each year analysed were identified as the numerators for calculating the prevalence of T1DM and T2DM. The prevalence was estimated by dividing the numerator population by the eligible registered population aged above 12 years (denominator) on 1<sup>st</sup> of January for the corresponding year. Among these patients, those diagnosed with any retinopathy and those with STR were numerators for calculating the prevalence of DR and STR respectively. Prevalence estimates are provided for patients with T1DM and T2DM separately with 95% confidence intervals. A description of patients aged 12 or above with a diagnosis of DM is also given for the year 2017. Baseline characteristics such as age, and age at diagnosis of diabetes

1  
2  
3  
4 were summarized as the mean (SD), and as frequency (percentage) for sex,  
5  
6 Townsend deprivation quintile and ethnicity. These characteristics were also reported  
7  
8 as stratified by type of DM. A detailed description of the proportion of DM patients  
9  
10 (T1DM and T2DM aged 12 or above) with DR in the year 2017 categorized by DR  
11  
12 severity is also presented. Estimates from IMRD were compared to estimates  
13  
14 obtained from data from UK studies (5-7, 9, 35) for verification and comparison.  
15  
16  
17

## 18 **Results**

19  
20  
21 Figure 1 gives the Patients flow and case selection algorithm. As of 1<sup>st</sup> January 2017,  
22  
23 2,813,916 people were eligible to be included in the primary cross-sectional analysis.  
24  
25 The demography characteristics of the sample are given in Table 1. The mean age of  
26  
27 patients with T1DM and T2DM as of 1<sup>st</sup> January 2017 was 42.5 (17.2) and 66.3  
28  
29 (13.0) respectively. The mean age at diagnosis of T1DM and T2DM were 21.4 (14.3)  
30  
31 and 57.0 (13.1) respectively. Nearly 80% and 55% of patients respectively had their  
32  
33 Townsend deprivation and ethnicity recorded in the IMRD database.  
34  
35  
36  
37

## 38 **Prevalence trends**

39  
40  
41 The results in figures 2 and 3 show an almost a global upward trend in the  
42  
43 prevalence of both types of diabetes (T1DM and T2DM) and in DR (all types of DR /  
44  
45 STR). The highest rise was seen in STR in those with T1DM (3.7 times increase in  
46  
47 two decades). The second highest rise was in all types of DR in the T2DM population  
48  
49 (2.8 times). Splitting this data by the decades (1998 to 2007 versus 2009 to 2018),  
50  
51 the end of the first decade showed a higher increase in every category (diabetes as  
52  
53 well as diabetic retinopathy) as compared to the second decade, except in T1DM  
54  
55 where it was higher in second decade (Appendix 4). T2DM increased more than  
56  
57  
58  
59  
60

10

1  
2  
3  
4 T1DM between 1998 and 2018, but while the increase in T2DM prevalence slowed  
5  
6 recently, the increase in T1DM prevalence accelerated significantly in the recent  
7  
8 decade.  
9  
10  
11  
12  
13  
14  
15  
16  
17  
18  
19  
20  
21  
22  
23  
24  
25  
26  
27  
28  
29  
30  
31  
32  
33  
34  
35  
36  
37  
38  
39  
40  
41  
42  
43  
44  
45  
46  
47  
48  
49  
50  
51  
52  
53  
54  
55  
56  
57  
58  
59  
60

For peer review only

11

Table 1: Demography of patients with DM in IMRD data on 1st of January 2017

|                                       | <b>DM (N)</b> | <b>% / (SD)</b> | <b>T1DM (N)</b> | <b>% / (SD)</b> | <b>T2DM (N)</b> | <b>% / (SD)</b> |
|---------------------------------------|---------------|-----------------|-----------------|-----------------|-----------------|-----------------|
| <b>Total</b>                          | 180,824       | 100.00%         | 12,434          | 6.88%           | 168,390         | 93.12%          |
| <b>Gender</b>                         |               |                 |                 |                 |                 |                 |
| <b>Male</b>                           | 101,628       | 56.20%          | 7,192           | 57.84%          | 94,436          | 56.08%          |
| <b>Female</b>                         | 79,196        | 43.80%          | 5,242           | 42.16%          | 73,954          | 43.92%          |
| <b>Age</b>                            | 180,824       | 64.7 (SD 14.7)  | 12,434          | 42.5 (SD 17.2)  | 168,390         | 66.3 (SD 13.0)  |
| <b>Age at diagnosis</b>               | 180,788       | 54.6 (SD 16.0)  | 12,422          | 21.4 (SD 14.3)  | 168,366         | 57.0 (SD 13.1)  |
| <b>Townsend</b>                       |               |                 |                 |                 |                 |                 |
| <b>1</b>                              | 27,616        | 15.27%          | 2,037           | 16.38%          | 25,579          | 15.19%          |
| <b>2</b>                              | 30,011        | 16.60%          | 2,206           | 17.74%          | 27,805          | 16.51%          |
| <b>3</b>                              | 32,434        | 17.94%          | 2,222           | 17.87%          | 30,212          | 17.94%          |
| <b>4</b>                              | 31,332        | 17.33%          | 1,978           | 15.91%          | 29,354          | 17.43%          |
| <b>5</b>                              | 24,606        | 13.61%          | 1,568           | 12.61%          | 23,038          | 13.68%          |
| <b>Missing</b>                        | 34,825        | 19.26%          | 2,423           | 19.49%          | 32,402          | 19.24%          |
| <b>Ethnicity</b>                      |               |                 |                 |                 |                 |                 |
| <b>Caucasian</b>                      | 88,420        | 48.90%          | 6,584           | 52.95%          | 81,836          | 48.60%          |
| <b>Black afro Caribbean</b>           | 2,738         | 1.51%           | 98              | 0.79%           | 2640            | 1.57%           |
| <b>Chinese/Middle eastern/ others</b> | 567           | 0.31%           | 45              | 0.36%           | 522             | 0.31%           |
| <b>South Asians</b>                   | 6,361         | 3.52%           | 124             | 1.00%           | 6237            | 3.70%           |
| <b>Mixed race</b>                     | 1243          | 0.69%           | 32              | 0.26%           | 1211            | 0.72%           |
| <b>Missing</b>                        | 81,495        | 45.07%          | 5551            | 44.64%          | 75944           | 45.10%          |

DM-Diabetes Mellitus; T2DM – Type 2 Diabetes Mellitus; T1DM – Type 1 Diabetes Mellitus Number; N, Standard deviation; (SD)

12

**Forecasting model**

The forecasted annual UK prevalence values of T1DM, T2DM, DR and STR, with their 95% prediction intervals (PI), are given in the Appendix 5. These suggest that the prevalence will increase by 24% (5 to 43%), 7% (-28 to 41%), 9% (-50 to 65%) and 17% (-21 to 54%) respectively by 2030. Corresponding estimates of the absolute numbers of people in the UK forecast to have these conditions are shown in Table 2. These correspond to 0.36 (.3 -.4), 4 (2.6 - 5.3), 1.6 (.7-2.5), and 0.64 (.42-.86) million people respectively having each condition, respectively. We verified our UK forecast for 2019 and found the total figure (3,800,920) to be close to the Quality Outcome Framework provided estimate of diagnosed DM of 3,809,119.

13

Table 2: Future Projections of Diabetes and DR disease Burden

| Year | Projected Population | *T1DM  | *T2DM   | *Total DM | #DR     | #STR   |
|------|----------------------|--------|---------|-----------|---------|--------|
| 2019 | 66800000             | 280560 | 3520360 | 3800920   | 1311317 | 482717 |
| 2020 | 67200000             | 288960 | 3568320 | 3857280   | 1342333 | 497589 |
| 2021 | 67500000             | 297000 | 3604500 | 3901500   | 1369427 | 511097 |
| 2022 | 67800000             | 305100 | 3647640 | 3952740   | 1399270 | 525714 |
| 2023 | 68100000             | 306450 | 3684210 | 3990660   | 1420675 | 538739 |
| 2024 | 68400000             | 314640 | 3720960 | 4035600   | 1448780 | 552877 |
| 2025 | 68700000             | 322890 | 3764760 | 4087650   | 1479729 | 568183 |
| 2026 | 68900000             | 330720 | 3796390 | 4127110   | 1506395 | 581923 |
| 2027 | 69200000             | 339080 | 3833680 | 4172760   | 1535576 | 596705 |
| 2028 | 69400000             | 347000 | 3872520 | 4219520   | 1561222 | 611830 |
| 2029 | 69600000             | 354960 | 3904560 | 4259520   | 1588801 | 626149 |
| 2030 | 69800000             | 362960 | 3936720 | 4299680   | 1616680 | 640652 |

\*The DR and STR forecast is actual IMRD based figures projected for the UK population (34). Formula used is Affected Population = Projected Prevalence X Projected Population. # In calculating projections for diabetic retinopathy, we have applied the retinopathy rates of those aged 12 and above for the whole diabetes population rather than for those above 12 years old (age at which retinopathy screening commences and was one of our inclusion criteria). This approximately gives the projected total population, as breakdown for over 12 years is not available but the number of patients with DM below 12 years is negligibly small.



14

## 2017 Cross-sectional analysis

In the 2017 data analysis, 180,824 patients had a code for diabetes prior to this date of which 12,434 (6.9%) were identified as T1DM and 168,390 (93.1%) were identified as T2DM. Patients with DM were more likely to be men (56.2% vs 43.8%). The prevalence of DR in different stages of progression is given in Table 3. Prevalence of any DR and STR among patients with DM aged 12 and above was 33.8% and 12.3% respectively. When stratified by diabetes type, a higher proportion of patients with T1DM had a more severe form of retinopathy than patients with T2DM (prevalence of STR was 29.7% vs 11%), while prevalence of pre-STR (R0/R1 & M0) was higher among patients with T2DM (31.8% in T1DM vs 37.8% in T2DM). Each subcategory among STR population (R2 / R3 / M1 and their combinations), was present in higher proportion of patients with T1DM as compared to T2DM (R2: 3.7% vs 1.2%; R3: 12.1% vs 1.9%; and M1: 19.6% vs 7.0% respectively). A higher proportion of patients with T1DM compared to T2DM also received treatment procedures (Laser: 7.1% vs 1.3%; Vitreous injection and procedures: 5.1% vs 1.1%). There was also a higher proportion of documented cases of visual impairment or vision loss among T1DM [3.1% vs 2.8%].

Table 3: Diabetic Retinopathy in patients with DM in IMRD data on 1<sup>st</sup> of January 2017

|                                         | DM            |               | T1DM         |               | T2DM          |               |
|-----------------------------------------|---------------|---------------|--------------|---------------|---------------|---------------|
| Diabetes (N)                            | 180,824       | %             | 12,434       | %             | 168,390       | %             |
| No Retinopathy coding available         | 82,119        | 45.41%        | 3,846        | 30.93%        | 78,273        | 46.48%        |
| Retinopathy Coding available            | 98,705        | 54.59%        | 8,588        | 69.07%        | 90,117        | 53.52%        |
| <b>Pre-STR</b>                          | <b>67750</b>  | <b>37.47%</b> | <b>3951</b>  | <b>31.78%</b> | <b>63699</b>  | <b>37.83%</b> |
| <b>No DR (R0M0)</b>                     | 37,618        | 20.80%        | 1,472        | 11.84%        | 36,146        | 21.47%        |
| <b>R1</b>                               | 30,132        | 16.66%        | 2,479        | 19.94%        | 27,553        | 16.36%        |
| <b>STR</b>                              | <b>22,198</b> | <b>12.28%</b> | <b>3,693</b> | <b>29.70%</b> | <b>18,505</b> | <b>10.99%</b> |
| <b>STR without Rx or vision loss</b>    | 13,165        | 7.28%         | 2,271        | 18.26%        | 10,894        | 6.47%         |
| <b>R2</b>                               | 2,487         | 1.38%         | 454          | 3.65%         | 2,033         | 1.21%         |
| <b>R3</b>                               | 4,729         | 2.62%         | 1,505        | 12.10%        | 3,224         | 1.91%         |
| <b>M1</b>                               | 14,206        | 7.86%         | 2,440        | 19.62%        | 11,766        | 6.99%         |
| <b>STR with Rx and vision loss</b>      | 9,033         | 5.00%         | 1,422        | 11.44%        | 7,611         | 4.52%         |
| <b>Laser</b>                            | 3,092         | 1.71%         | 885          | 7.12%         | 2,207         | 1.31%         |
| <b>Vitreous injections / procedures</b> | 2,536         | 1.40%         | 637          | 5.12%         | 1,899         | 1.13%         |
| <b>Vision loss / blindness</b>          | 5,050         | 2.79%         | 384          | 3.09%         | 4,666         | 2.77%         |
| <b>None specific for STR or Pre-STR</b> | <b>8,757</b>  | <b>4.84%</b>  | <b>844</b>   | <b>6.79%</b>  | <b>7913</b>   | <b>4.70%</b>  |
| <b>Any retinopathy</b>                  | 61087         | 33.78%        | 7016         | 56.43%        | 53971         | 32.05%        |

DR – Diabetic retinopathy, R0 – no retinopathy, M0 – no maculopathy, R1, Background retinopathy, Pre-STR is combination of no diabetic retinopathy and background retinopathy, R2 is pre-proliferative diabetic retinopathy, R3 is proliferative diabetic retinopathy, M1 is diabetic maculopathy, STR is sight-threatening retinopathy which is a combination of R2, R3 and M1, Non-specific retinopathy is where it cannot be categorised into R1 or STR. Where colour codes are assigned, the same colour indicates that they are mutually exclusive. Where colour codes are not assigned, they overlap within that category. For example, patients with M1 can have either R2 or R3, likewise patients who received laser treatment could have received vitreous injection. The WHO standards (36) were used for vision loss. Here all categories were combined into a single category.

16

## Discussion

### Principal findings

We explored the disease burden associated with DM and DR in the UK from the past, present and future perspectives. Our study followed a tripartite structure, comprising of 1) a series of epidemiological studies throughout a 20-year span to document disease-specific trends, 2) training a forecasting model to predict the future disease burden to guide clinical practice and service development and 3) a detailed descriptive cross-sectional analysis in 2017 using a study population of 180,824 people with diabetes to explore contemporary prevalence estimates of different forms of DR.

Between 1998 and 2018, the prevalence of DR and STR increased. The prevalence of all DR in T2DM nearly tripled and STR almost quadrupled among patients with T1DM aged 12 and above. There was a parallel increase in the overall prevalence of DM. While the growth in the numbers of T1DM patients was less than that for patients with T2DM, stratifying the calculations by two decades showed a marked rise in the rate of increase in T1DM prevalence in the latter half of the whole period between 1998 and 2018. This was in sharp contrast to the trends in T2DM, STR and DR prevalence, which showed a higher rise in the decade between 1998 and 2007 but slowed down in the later decade between 2009 and 2018.

Our forecasting model showed that, in less than ten years, over 1.5 million people with diabetes will have some DR, almost two thirds of a million of whom will have STR. With T1DM expected to rise faster and higher, it is also likely to correspond to a comparatively higher rise in STR, forcing a further increase in demand on services.

17

1  
2  
3 A key parameter when calculating the current and future prevalence of DR is the  
4 accuracy of estimates of the trend of the underlying condition, i.e., the presence of  
5 DM. T1DM showed a smaller increase in the period starting from 1998, but this has  
6 accelerated since 2009. This is the most concerning recent trend considering that  
7 these are younger patients (mean age of diagnosis of 21.4 vs 57), having to live with  
8 the condition and its complications for more life years, and suffering from the more  
9 severe form of DR, with the consequent disability, treatment burden and treatment  
10 costs. There is a recent report of a 3.4% annual increase in the incidence rate of  
11 T1DM in children (13). Although there is an association between T1DM and obesity  
12 (37), it is believed that the cause may be multifactorial, including hygiene, viral  
13 factors and vitamin D deficiency amongst others (38).

14  
15 The diagnosed DM prevalence based on the 2017 IMRD cross-sectional survey is  
16 5.2%. The detailed descriptive analysis in 2017 showed that, out of 180,824 people  
17 with diabetes, 33.8% had any DR as a complication, 12.3% had STR and  
18 importantly, 2.8% had blindness or vision loss. STR was 52% of total DR in T1DM  
19 and 34% of total DR in T2DM. In 2017, nearly one third of all patients with T1DM  
20 were affected by a sight threatening form of DR. This analysis also confirmed the  
21 notion that, from the health care perspective, neither DM type is “benign” with  
22 regards to DR risk, since DR severity is graver in T1DM, and absolute numbers of  
23 affected individuals are higher in T2DM.

24  
25 Diabetic complications are mainly macrovascular damage (coronary artery disease,  
26 peripheral arterial disease, and stroke) or microvascular damage to blood vessels in  
27 organs like kidney, foot and nerves (39). Tackling the first reduces mortality rate and  
28 might mean these patients living longer and consequently a higher prevalence of DR  
29 among higher risk patients. With greater efficacy and a rapid reduction of HBA1C,  
30  
31  
32  
33  
34  
35  
36  
37  
38  
39  
40  
41  
42  
43  
44  
45  
46  
47  
48  
49  
50  
51  
52  
53  
54  
55  
56  
57  
58  
59  
60

18

1  
2  
3 the new agents might induce progression of DR (early worsening) (40). So, with  
4 increased prevalence there may be a disproportionate rise in more high-risk DR  
5 cases. There are conflicting reports on direct effect of newer medical treatments like  
6 Incretin based therapies on DR (40, 41) but the follow-up is limited at the moment.  
7  
8  
9  
10  
11  
12

### 13 **Strengths and weaknesses of this study**

14  
15  
16 This study reports up to date prevalence figures of DM, DR and STR, as well as  
17 trends from 1998 to 2018, in a clinically relevant form, which clinicians and managers  
18 leading hospital eye services can use in the management of services for diabetes  
19 and diabetic retinopathy. Our work is based on a cross-sectional analysis of primary  
20 care data and is therefore closer to routine practice. Our findings have also been  
21 verified against PHE, DESP, and other previously published figures (5-7, 14, 35, 42,  
22 43). This is also the first observational IMRD based study to forecast the DM, DR  
23 and STR disease burden in the UK all together. While incorporating current evidence  
24 on the trend of underlying condition (DM), this study portrays a comprehensive  
25 analysis of the recent DR disease burden.  
26  
27  
28  
29  
30  
31  
32  
33  
34  
35  
36  
37  
38

39 The findings of this study should be interpreted within the context of its limitations. In  
40 particular, the inability to incorporate evidence regarding the potential impact of  
41 glycaemia control and concomitant medications on the incidence of diabetic  
42 retinopathy should be promptly acknowledged. Suboptimal glycaemic control is a  
43 well-established risk factor for microvascular complications (such as DR), whereas  
44 fenofibrate, an agent used in in some patients with diabetes may have a positive  
45 effect on the course of DR.  
46  
47  
48  
49  
50  
51  
52  
53  
54  
55  
56  
57  
58  
59  
60

19

1  
2  
3 Additional limitations are possible coding errors, challenges of addressing missing  
4 data, changes in the diagnostic criteria of DM and the potential risk of an  
5 overestimation of vision failure. The findings of this study should be interpreted within  
6 that context. Firstly, the possible impact of coding errors, as well as subjectivity in  
7 documentation across a retrospective nationwide database involving several  
8 practices in different areas, cannot be precluded. This potential risk was minimised  
9 through a strict Read code selection process. The prevalence of severe DR was  
10 higher for those of South Asian and mixed ethnicity (9), therefore could have  
11 implications for local variations in its prevalence, and estimates could differ  
12 depending on the local ethnic mix. The potential impact of several concomitant  
13 medications on the course of DR was not captured in this study design. For the sake  
14 of future projections, estimates from individuals over 12 years old were applied to the  
15 whole population to calculate the final values, assuming that the number of DM  
16 patients under 12 is extremely low. Finally, we acknowledge that these projections  
17 are subject to the assumption that factors affecting the incidence, course and  
18 progression of the disease will remain stable over the next few years.

19  
20  
21  
22  
23  
24  
25  
26  
27  
28  
29  
30  
31  
32  
33  
34  
35  
36  
37  
38  
39  
40  
41 We wanted to verify our figures against data from DESP which screens everyone  
42 from age 12 (44) and Mathur et al. work (9). Both these research studies used a cut  
43 off of over 12 years for their estimates. We wanted our findings to be generalizable  
44 to the whole UK populations with diabetes including those under care of DRSP and  
45 Hospital Eye Services. We also wanted it to be generalisable internationally where  
46 majority of world population with diabetes is within one pool, without access to  
47 screening services. Limitations of this age cut off are that 2017 figures are not easily  
48 verifiable against PHE figures 2017 being over 17 years of age. So, verification  
49  
50  
51  
52  
53  
54  
55  
56  
57  
58  
59  
60

20

1  
2  
3 against that estimate is a bit problematic and thus adds uncertainty to our UK  
4  
5 forecast estimates.  
6  
7

8 **Strengths and weaknesses in relation to other studies, discussing particularly**  
9  
10 **any differences in results**  
11  
12

13  
14 Gonzalez et al (14) reported an increasing prevalence of diabetes between the years  
15  
16 1996 and 2005 (10 years) based on THIN data analysis of patients aged 10 to 79  
17  
18 years old. They reported an overall increase of 54%. Our estimate between 1998  
19  
20 and 2005 (our data did not match the years) was 60%. In a Clinical Practice  
21  
22 Research Datalink (CPRD) based study, Zghebi et al (43) found an overall increase  
23  
24 of 64% in the patient population between 2004 to 2014, but this was limited to  
25  
26 patients over 16 years old with T2DM. Our corresponding figures are 63%. Thus, our  
27  
28 estimates fall midway between these two studies. Bagust et al presented a future  
29  
30 forecast for UK, but is limited to T2DM and is an underestimation (11). It projected  
31  
32 T2DM figures for 2036 to be 1.1 million.  
33  
34  
35

36  
37 The PHE estimate for prevalence of diabetes in UK in 2017 arrived at by Quality and  
38  
39 Outcome Framework figures was 3.7 million (5.6%) in those aged 17 years and over  
40  
41 (42) and included diagnosed patients with diabetes. Our estimate of diagnosed  
42  
43 patients with diabetes in 2017 of 3.4 million (crude prevalence of 5.2%) in over 12  
44  
45 years old population contrasts with the 2017 PHE figures. Similarly, PHE predicted  
46  
47 the diabetes burden for 2025 to be 4.9 million for people aged over 16 years (45). It  
48  
49 is not possible to make a direct comparison with our forecast of just under 4.3 million  
50  
51 for 2025 because of our estimate being for people over 12 years of age but could  
52  
53 mean the present study to be an underestimation. Alternatively, PHE figures could  
54  
55 be an overestimation for 2017, because of the inbuilt assumptions in that model. Our  
56  
57  
58  
59  
60

21

1  
2  
3 estimate for 2019 matches the quality and outcome estimate of 3.8 million.

4  
5 International Diabetes Federation (IDF) (46) estimated total diabetes prevalent cases  
6  
7 (20 to 79 years old) to be 2.7 million in 2017, which is an underestimation when  
8  
9 compared to PHE and our study.

10  
11  
12  
13 A recent DR prevalence study focussed on lower risk patients with diabetes under  
14  
15 screening services (9). The DR period prevalence in the Mathur's study (2004 to  
16  
17 2014) was found to be 48.4% for patients with T1DM and 28.3% for patients with  
18  
19 T2DM, contrasting with point prevalence (2017) of 56.4% and 32.0% for patients with  
20  
21 T1DM and T2DM respectively in our study. They also did not split the pathology into  
22  
23 maculopathy and pre-proliferative categories and did not include treatment and  
24  
25 vision failure. Li et al 2019 (10) is the only study so far, that has projected DR till  
26  
27 2050. They estimated that 8.6 million people with diabetes (DR in 25% of the  
28  
29 European population with T2DM and 50% with T1DM) will have diabetic eye disease  
30  
31 inn 2050. The British studies included within this systematic review were based on  
32  
33 diabetic screening services from pre-2009 (47) and pre-2003 data (7). Case  
34  
35 definitions and patient pathways have since changed. Consequently, their figures are  
36  
37 a significant underestimation as compared to ours (710,510 vs 1,612,395 in 2030)

38  
39  
40  
41  
42  
43 Other prevalence studies from the UK (5-7, 35) are compared with estimates from  
44  
45 our study in detail for completeness in Appendix 6 and Appendix 7. Majority of these  
46  
47 UK studies are quite old, come from the screening programme setting, and do not  
48  
49 deal with all of the categories of DR due to changed case definitions. Keenen et al  
50  
51 (48) is a study based on work between 2007 and 2009 on hospital patients. They  
52  
53 based their estimates of prevalence in eyes rather than patients, therefore, due to  
54  
55 this heterogeneity, cannot be directly compared with our figures.  
56  
57  
58  
59  
60



22

### **Meaning of the study: possible mechanisms and implications for clinicians or policymakers**

Consecutive analyses over the course of over two decades provides information regarding the trend and severity of diabetic disease, and by a detailed analysis of different forms and severity groups, it captures the implications for the public health system. With the use of relevant outcomes, coupled with a prerequisite validation, the study provides a forecasting model which will be of use for clinicians and managers leading the professional services in planning the capacity to meet the increasing demand, and will guide public health strategy. Local demand can be calculated with the help of national figures provided by taking local factors into account (49).

Out of the 33.8% of total DR in all patients with diabetes, 12.3% was made up of the STR. Those STR patients that actually needed treatment or experienced vision failure constituted a total of 5%. These figures reflect a high false-positive rate of referrals (50 - 70% as reported earlier (2, 50) and needs to be considered in the future relationship between DESP and overburdened hospital eye services. Our estimated prevalence figures, in a clinically relevant form will help the clinicians and managers leading hospital eye services to optimise capacity planning for the increased demand.

### **Unanswered questions and future research**

PHE used a prevalence model to predict the disease burden of diabetes in 2016 (49). The predictive factors they used were age, ethnicity, gender, and deprivation index. To accommodate local variation in populations and practices, final calculations can be made using these predictive factors. The above-mentioned

23

1  
2  
3 limitations of the study can be overcome by a future collaborative study linking DR  
4 screening and hospital eye services data, with figures based on patient numbers and  
5 not eyes, to prevent heterogeneity among studies. Forecasting capacity needs is an  
6 area that should be repeated periodically with the help of the forecasting model  
7 presented.  
8  
9  
10  
11  
12  
13  
14

## 15 **Conclusion**

16  
17 In our study, the estimates suggested a trend of differential rise in prevalence rates  
18 in T1DM and T2DM. Overall, there is a continuing rise in the numbers of patients  
19 with DM and DR needing care. Preventive strategies and service planning can be  
20 based on these projected prevalence estimates to meet demand over the next ten  
21 years. Future forecasting will need repeating periodically to capture any external  
22 factors causing a change in the present trend.  
23  
24  
25  
26  
27  
28  
29  
30  
31

32 **Acknowledgements / Contributions:** SH and KN designed the main study. AS  
33 performed data extraction. SH made the main contribution to the interpretation of  
34 data and wrote up the draft. RT designed and carried out the future projection model.  
35 AS, MP, DM, KT and KN made a contribution verbally or by critical revision of the  
36 draft. All authors approved the final version of the manuscript.  
37  
38  
39  
40  
41  
42  
43  
44  
45

46 **Funding:** This research received no specific grant from any funding agency in the  
47 public, commercial or not-for-profit sectors.  
48  
49  
50  
51  
52  
53

## 54 **Data Sharing Statement:**

55  
56  
57 Data was part of a digital database and is not available to be shared. Analysis details  
58 are in the publication / appendices.  
59  
60

24

**Competing interest**

The authors have no competing interest to disclose.

**Ethical approvals:**

The IMRD database has blanket approval by the NHS South East Multi-centre Research Ethics Committee (MREC) in 2003 (51). The study protocols were submitted to both the Scientific Review Committee and the Science, Technology, Engineering and Mathematics Ethical Review Committee at the University of Birmingham for review and approval, which were granted. Consent was not required.

## References

1. Bourne RRA, Jonas JB, Bron AM, Cicinelli MV, Das A, Flaxman SR, et al. Prevalence and causes of vision loss in high-income countries and in Eastern and Central Europe in 2015: magnitude, temporal trends and projections. *The British journal of ophthalmology*. 2018;102(5):575-85.
2. The Royal College of Ophthalmologists. The way forward age-related macular degeneration and diabetic retinopathy 2016  
[ ]. Available from: <https://www.rcophth.ac.uk/wp-content/uploads/2015/10/RCOphth-The-Way-Forward-AMD-300117.pdf>, Accessed 2019, July 20.
3. Sabanayagam C, Banu R, Chee ML, Lee R, Wang YX, Tan G, et al. Incidence and progression of diabetic retinopathy: a systematic review. *The Lancet Diabetes & Endocrinology*. 2019;7(2):140-9.
4. Buchan JC, Norman P, Shickle D, Cassels-Brown A, MacEwen C. Failing to plan and planning to fail. Can we predict the future growth of demand on UK Eye Care Services? *Eye (London, England)*. 2019;33(7):1029-31.
5. Thomas RL, Dunstan FD, Luzio SD, Chowdhury SR, North RV, Hale SL, et al. Prevalence of diabetic retinopathy within a national diabetic retinopathy screening service. *The British journal of ophthalmology*. 2015;99(1):64-8.
6. Misra A, Bachmann MO, Greenwood RH, Jenkins C, Shaw A, Barakat O, et al. Trends in yield and effects of screening intervals during 17 years of a large UK community-based diabetic retinopathy screening programme. *Diabetic medicine : a journal of the British Diabetic Association*. 2009;26(10):1040-7.
7. Younis N, Broadbent DM, Harding SP, Vora JP. Incidence of sight-threatening retinopathy in Type 1 diabetes in a systematic screening programme. *Diabetic Medicine*. 2003;20(9):758-65.
8. Looker H, Nyangoma S, Cromie D, Olson J, Leese G, Black M, et al. Diabetic retinopathy at diagnosis of type 2 diabetes in Scotland. *Diabetologia*. 2012;55(9):2335-42.
9. Mathur R, Bhaskaran K, Edwards E, Lee H, Chaturvedi N, Smeeth L, et al. Population trends in the 10-year incidence and prevalence of diabetic retinopathy in the UK: a cohort study in the Clinical Practice Research Datalink 2004-2014. *BMJ open*. 2017;7(2):e014444.
10. Li JQ, Welchowski T, Schmid M, Letow J, Wolpers C, Pascual-Camps I, et al. Prevalence, incidence and future projection of diabetic eye disease in Europe: a systematic review and meta-analysis. *Eur J Epidemiol*. 2019.
11. Bagust A, Hopkinson PK, Maslove L, Currie CJ. The projected health care burden of Type 2 diabetes in the UK from 2000 to 2060. *Diabetic medicine : a journal of the British Diabetic Association*. 2002;19 Suppl 4:1-5.
12. Candler T, Mahmoud O, Lynn R, Majbar A, Barrett T, Shield J. Continuing rise of type 2 diabetes incidence in children and young people in the UK. *Diabetic Medicine*. 2018;35(6):737-44.
13. Patterson CC, Harjutsalo V, Rosenbauer J, Neu A, Cinek O, Skrivarhaug T, et al. Trends and cyclical variation in the incidence of childhood type 1 diabetes in 26 European centres in the 25 year period 1989–2013: a multicentre prospective registration study. *Diabetologia*. 2019;62(3):408-17.

14. Gonzalez EL, Johansson S, Wallander MA, Rodriguez LA. Trends in the prevalence and incidence of diabetes in the UK: 1996-2005. *Journal of epidemiology and community health*. 2009;63(4):332-6.
15. Public Health England. Diabetes Prevalence 2019 2019 [Available from: <https://www.diabetes.org.uk/professionals/position-statements-reports/statistics/diabetes-prevalence-2019>, Accessed 2020, May 12.
16. Petherick ES, Pickett KE, Cullum NA. Can different primary care databases produce comparable estimates of burden of disease: results of a study exploring venous leg ulceration. *Family practice*. 2015;32(4):374-80.
17. Pham TM, Carpenter JR, Morris TP, Sharma M, Petersen I. Ethnic Differences in the Prevalence of Type 2 Diabetes Diagnoses in the UK: Cross-Sectional Analysis of the Health Improvement Network Primary Care Database. *Clin Epidemiol*. 2019;11:1081-8.
18. Guest JF, Ayoub N, McIlwraith T, Uchegbu I, Gerrish A, Weidlich D, et al. Health economic burden that wounds impose on the National Health Service in the UK. *BMJ open*. 2015;5(12):e009283-e.
19. Tulloch JSP, Christley RM, Radford AD, Warner JC, Beadsworth MJB, Beeching NJ, et al. A descriptive epidemiological study of the incidence of newly diagnosed Lyme disease cases in a UK primary care cohort, 1998-2016. *BMC Infect Dis*. 2020;20(1):285-.
20. Adderley NJ, Subramanian A, Nirantharakumar K, Yiangou A, Gokhale KM, Mollan SP, et al. Association Between Idiopathic Intracranial Hypertension and Risk of Cardiovascular Diseases in Women in the United Kingdom. *JAMA Neurol*. 2019;76(9):1088-98.
21. Chandan JS, Gokhale KM, Bradbury-Jones C, Nirantharakumar K, Bandyopadhyay S, Taylor J. Exploration of trends in the incidence and prevalence of childhood maltreatment and domestic abuse recording in UK primary care: a retrospective cohort study using 'the health improvement network' database. *BMJ open*. 2020;10(6):e036949-e.
22. Blak BT, Thompson M, Dattani H, Bourke A. Generalisability of The Health Improvement Network (THIN) database: demographics, chronic disease prevalence and mortality rates. *Informatics in primary care*. 2011;19(4):251-5.
23. Maguire A, Blak BT, Thompson M. The importance of defining periods of complete mortality reporting for research using automated data from primary care. *Pharmacoepidemiology and drug safety*. 2009;18(1):76-83.
24. Martin-Merino E, Fortuny J, Rivero E, Garcia-Rodriguez LA. Validation of diabetic retinopathy and maculopathy diagnoses recorded in a U.K. primary care database. *Diabetes care*. 2012;35(4):762-7.
25. Martin-Merino E, Fortuny J, Rivero-Ferrer E, Garcia-Rodriguez LA. Incidence of retinal complications in a cohort of newly diagnosed diabetic patients. *PLoS one*. 2014;9(6):e100283.
26. Martin-Merino E, Fortuny J, Rivero-Ferrer E, Lind M, Garcia-Rodriguez LA. Risk factors for diabetic retinopathy in people with Type 2 diabetes: A case-control study in a UK primary care setting. *Primary care diabetes*. 2016;10(4):300-8.
27. McEwan P, Bennett H, Ward T, Bergenheim K. Refitting of the UKPDS 68 risk equations to contemporary routine clinical practice data in the UK. *Pharmacoeconomics*. 2015;33(2):149-61.
28. Dave S, Petersen I. Creating medical and drug code lists to identify cases in primary care databases. *Pharmacoepidemiology and drug safety*. 2009;18(8):704-7.

- 1
  - 2
  - 3
  - 4
  - 5
  - 6
  - 7
  - 8
  - 9
  - 10
  - 11
  - 12
  - 13
  - 14
  - 15
  - 16
  - 17
  - 18
  - 19
  - 20
  - 21
  - 22
  - 23
  - 24
  - 25
  - 26
  - 27
  - 28
  - 29
  - 30
  - 31
  - 32
  - 33
  - 34
  - 35
  - 36
  - 37
  - 38
  - 39
  - 40
  - 41
  - 42
  - 43
  - 44
  - 45
  - 46
  - 47
  - 48
  - 49
  - 50
  - 51
  - 52
  - 53
  - 54
  - 55
  - 56
  - 57
  - 58
  - 59
  - 60
29. Public Health England. Diabetes Prevalence Model 2016 [Available from: [https://assets.publishing.service.gov.uk/government/uploads/system/uploads/attachment\\_data/file/612306/Diabetesprevalencemodelbriefing.pdf](https://assets.publishing.service.gov.uk/government/uploads/system/uploads/attachment_data/file/612306/Diabetesprevalencemodelbriefing.pdf), Accessed 2019, July 12.
30. Haider S, Sadiq SN, Moore D, Price MJ, Nirantharakumar K. Prognostic prediction models for diabetic retinopathy progression: a systematic review. *Eye*. 2019;33(5):702-13.
31. Rob J Hyndman and George Athanasopoulos. Forecasting: Principles and Practice, [Available from: <https://otexts.com/fpp2/tspatterns.html>.
32. Adams RJ, Tucker G, Hugo G, Hill CL, Wilson DH. Projected future trends of hospital service use for selected obesity-related conditions. *Obesity research & clinical practice*. 2008;2(2):133-41.
33. R Core Team. R: A language and environment for statistical computing. R Foundation for Statistical Computing, Vienna, Austria. 2019 [Available from: <http://www.R-project.org/>.
34. Office For national Statistics. National population projections: 2018-based, [Figure 1: UK population projected to rise to 69.4 million by mid 2028 and to 72.4 million by mid 2043]. 2019 [Available from: <https://www.ons.gov.uk/peoplepopulationandcommunity/populationandmigration/populationprojections/bulletins/nationalpopulationprojections/2018based>, Accessed 24th November 2020.
35. Minassian DC, Owens DR, Reidy A. Prevalence of diabetic macular oedema and related health and social care resource use in England. *The British journal of ophthalmology*. 2012;96(3):345-9.
36. World Health Organization. Blindness and vision impairment - key facts, 2019 [Available from: <https://www.who.int/news-room/fact-sheets/detail/blindness-and-visual-impairment>, accessed August 06, 2020.
37. Łuczyński W, Szypowska A, Głowińska-Olszewska B, Bossowski A. Overweight, obesity and features of metabolic syndrome in children with diabetes treated with insulin pump therapy. *European journal of pediatrics*. 2011;170(7):891-8.
38. Egro FM. Why is type 1 diabetes increasing? *Journal of molecular endocrinology*. 2013;51(1):R1-13.
39. Fowler MJ. Microvascular and Macrovascular Complications of Diabetes. *Clinical Diabetes*. 2008;26(2):77-82.
40. DeFronzo RA. Combination therapy with GLP-1 receptor agonist and SGLT2 inhibitor. *Diabetes Obes Metab*. 2017;19(10):1353-62.
41. Wang T, Hong JL, Gower EW, Pate V, Garg S, Buse JB, et al. Incretin-Based Therapies and Diabetic Retinopathy: Real-World Evidence in Older U.S. Adults. *Diabetes care*. 2018;41(9):1998-2009.
42. Diabetes UK. Diabetes Prevalence 2017, Quality and Outcomes Framework 2018 [Available from: <https://www.diabetes.org.uk/professionals/position-statements-reports/statistics/diabetes-prevalence-2017>, Accessed 2019, July 12.
43. Zghebi SS, Steinke DT, Carr MJ, Rutter MK, Emsley RA, Ashcroft DM. Examining trends in type 2 diabetes incidence, prevalence and mortality in the UK between 2004 and 2014. *Diabetes Obes Metab*. 2017;19(11):1537-45.
44. Scanlon PH. The English National Screening Programme for diabetic retinopathy 2003-2016. *Acta Diabetol*. 2017;54(6):515-25.
45. England PH. Research and analysis - Diabetic eye screening: 2016 to 2017 data.



- 1  
2  
3 46. Cho NH, Shaw JE, Karuranga S, Huang Y, da Rocha Fernandes JD,  
4 Ohlrogge AW, et al. IDF Diabetes Atlas: Global estimates of diabetes prevalence for  
5 2017 and projections for 2045. *Diabetes research and clinical practice*.  
6 2018;138:271-81.  
7  
8 47. Thomas RL, Dunstan F, Luzio SD, Roy Chowdury S, Hale SL, North RV, et al.  
9 Incidence of diabetic retinopathy in people with type 2 diabetes mellitus attending the  
10 Diabetic Retinopathy Screening Service for Wales: retrospective analysis. *BMJ*.  
11 2012;344:e874.  
12  
13 48. Keenan TD, Johnston RL, Donachie PH, Sparrow JM, Stratton IM, Scanlon P.  
14 United Kingdom National Ophthalmology Database Study: Diabetic Retinopathy;  
15 Report 1: prevalence of centre-involving diabetic macular oedema and other grades  
16 of maculopathy and retinopathy in hospital eye services. *Eye (London, England)*.  
17 2013;27(12):1397-404.  
18  
19 49. Public Health England. Diabetes Prevalence Estimates for CCG's by GP  
20 registered populations 2016 [Available from:  
21 [https://www.gov.uk/government/publications/diabetes-prevalence-estimates-for-](https://www.gov.uk/government/publications/diabetes-prevalence-estimates-for-local-populations)  
22 [local-populations](https://www.gov.uk/government/publications/diabetes-prevalence-estimates-for-local-populations), Accessed 2020, May 12.  
23  
24 50. Jyothi S, Elahi B, Srivastava A, Poole M, Nagi D, Sivaprasad S. Compliance  
25 with the quality standards of National Diabetic Retinopathy Screening Committee.  
26 *Primary care diabetes*. 2009;3(2):67-72.  
27  
28 51. NHS Health Research Authority. IQVIA Medical Research Data 2018  
29 [Available from: [https://www.hra.nhs.uk/planning-and-improving-](https://www.hra.nhs.uk/planning-and-improving-research/application-summaries/research-summaries/the-health-improvement-network-thin-database/)  
30 [research/application-summaries/research-summaries/the-health-improvement-](https://www.hra.nhs.uk/planning-and-improving-research/application-summaries/research-summaries/the-health-improvement-network-thin-database/)  
31 [network-thin-database/](https://www.hra.nhs.uk/planning-and-improving-research/application-summaries/research-summaries/the-health-improvement-network-thin-database/).  
32  
33  
34  
35  
36  
37  
38  
39  
40  
41  
42  
43  
44  
45  
46  
47  
48  
49  
50  
51  
52  
53  
54  
55  
56  
57  
58  
59  
60

29

## Titles and legends to figures

**Figure 1: Patients flow and case selection algorithm**

**Figure 2: Prevalence trends of DM from year 1998 to year 2018**

T1DM - Type 1 Diabetes Mellitus, T2DM - Type 2 Diabetes Mellitus

**Figure 3: Annual prevalence (95% CI) of DR and STR from year 1998 to year 2018**

DR - Diabetic Retinopathy, STR - Sight threatening Retinopathy

For peer review only



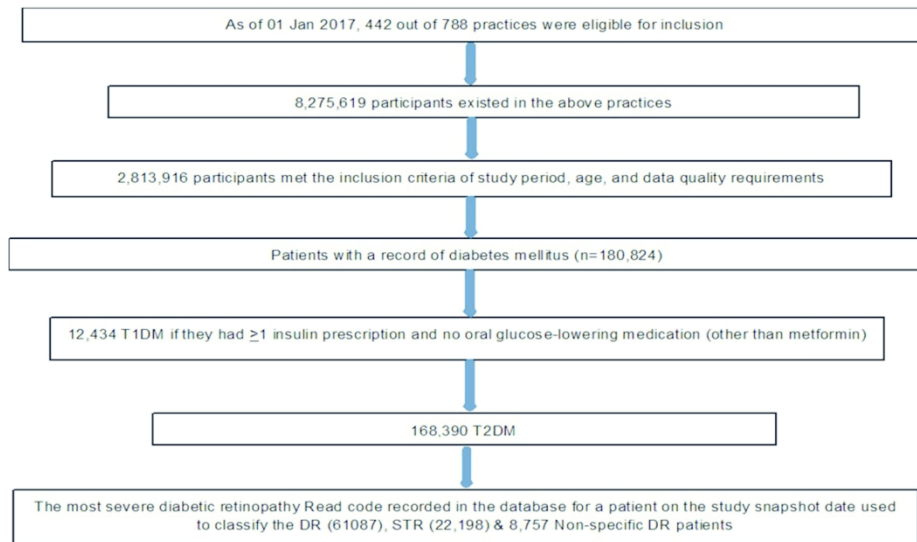

Figure 1: Patients flow and case selection algorithm

207x116mm (300 x 300 DPI)



Figure 2: Prevalence trends of DM from year 1998 to year 2018

209x119mm (300 x 300 DPI)

1  
2  
3  
4  
5  
6  
7  
8  
9  
10  
11  
12  
13  
14  
15  
16  
17  
18  
19  
20  
21  
22  
23  
24  
25  
26  
27  
28  
29  
30  
31  
32  
33  
34  
35  
36  
37  
38  
39  
40  
41  
42  
43  
44  
45  
46  
47  
48  
49  
50  
51  
52  
53  
54  
55  
56  
57  
58  
59  
60

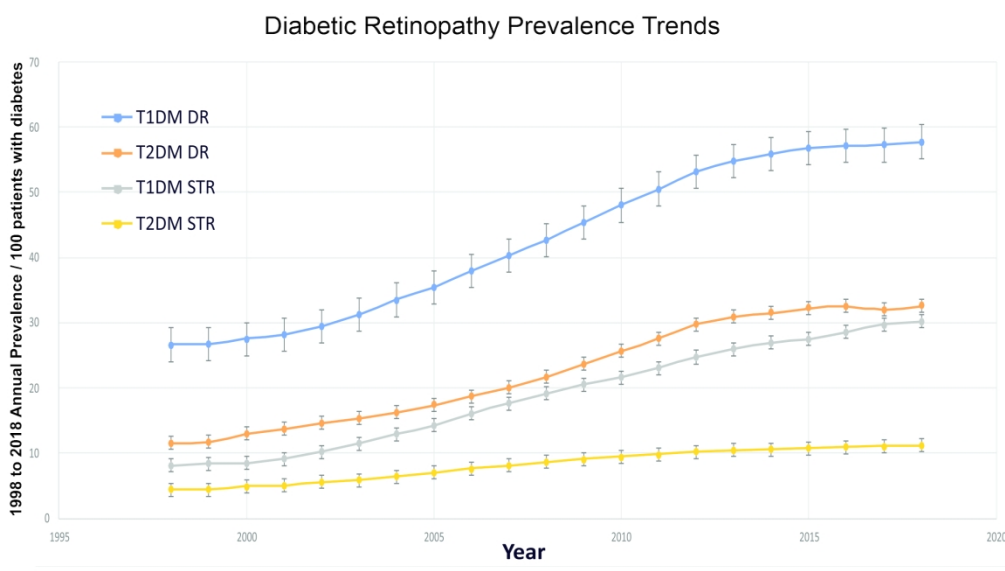

Figure 3: Annual prevalence (95% CI) of DR and STR from year 1998 to year 2018  
DR - Diabetic Retinopathy, STR - Sight threatening Retinopathy

201x120mm (300 x 300 DPI)

## Appendix 1: 7 Step Process of Read codes selection methods

Read codes cover clinical features, diagnosis, procedures, some drugs and investigations (1). Ones used in IMRD consist of 7 characters. They have a hierarchy with more specific ones down the order. This was done in collaboration with Jhot Chandan, a fellow doctoral researcher and my supervisor Krishnarajah Nirantharakumar (Institute of Applied Health Research)

1. The Read code database (MsAccess, MsExcel) is divided into two main columns: A Medcode column with unique 8 character codes for each condition and a description column. Both were used.
2. We developed a list of key search terms for the read codes of interest. These were searched for in the description column. Appendix below provides a list of key search words.
3. Results from the key word search were used to identify the main stem codes where the Read codes of interest belong to.
4. The Next step involved searching the MedCode column for the main stem codes to pick out codes that were otherwise missed on searching the description column.
5. We then also conducted an online search of published articles that have published similar Read Codes (2, 3).
6. Once collected, they were split into possible, probable and definite. There was deliberation between clinicians in the THINKing group to achieve these three lists.
7. They were then hand over to a group of data scientists within the THINKing group who split them into various files following epidemiological principles and saved them in CSV files database.

**References:**

1. Health I. THIN Data Guide for Researchers. 2017(Version 3):108.
2. Mathur R, Bhaskaran K, Edwards E, Lee H, Chaturvedi N, Smeeth L, et al. Population trends in the 10-year incidence and prevalence of diabetic retinopathy in the UK: a cohort study in the Clinical Practice Research Datalink 2004-2014. *BMJ open*. 2017;7(2):e014444.
3. McEwan P, Bennett H, Ward T, Bergenheim K. Refitting of the UKPDS 68 risk equations to contemporary routine clinical practice data in the UK. *Pharmacoeconomics*. 2015;33(2):149-61.

For peer review only

## Appendix 2: Search Terms for diabetic Retinopathy

|                                                                                                                                                                                                                                                                               |
|-------------------------------------------------------------------------------------------------------------------------------------------------------------------------------------------------------------------------------------------------------------------------------|
| Keywords for identifying diabetic retinopathy in the Read Codes Dictionary                                                                                                                                                                                                    |
| *O/E* or *PHOTOGRAPHY* or *RETINAL* or *SCR* <b>and</b> *HAEMORRHAGES* or *EXUDATE* or *MICROANEURYSMS* or *INTRARETINAL MICROVASCULAR ANAOMALY* or *ABNORMALITY*                                                                                                             |
| *RETINA* or *FUNDUS* or *MACULAR* or *VITREOUS* <b>and</b> *LASER" or *PHOTOCOAGULATION* or *INTRA-VITREAL INJECTIONS* or *INJECTIONS* or *RANIBIZUMAB* or *BIVACIZUMAB* or *AFLIBERCEPT* or *TRIAMCINOLON* or *ILEUVIEN* or *DEXAMETHOSON*                                   |
| *RETINOPATHY* or *FUNDOSCOPY* or *SEEN or *RETINAL SCR* or *RETINOSCOPY* or *SLIT LAMP* or *DIABETIC EYE* or *EXAMINATION OF RETINA* or *RETINA and OTHER PARTS OF EYE OPERATIONS* or *VITRECTOMY* or *MACULOPATHY* or *BACKGROUND* or *PRE PROLIFERATIVE* or *PROLIFERATIVE* |
| *BLIND" or *PARTIAL SIGHTED" or **SIGHT IMPAIRMENT" or *VISUAL IMPAIRMENT" or *VISUAL FAILURE"                                                                                                                                                                                |

## Appendix 3: Read Codes

| Code                                               | Description                                                       | Status   |
|----------------------------------------------------|-------------------------------------------------------------------|----------|
| <b>No Retinopathy (ROMO)</b>                       |                                                                   |          |
| 2BBD.00                                            | O/E - Right retina normal                                         | Probable |
| 2BBJ.00                                            | O/E - no right diabetic retinopathy                               | Definite |
| 2BB1.00                                            | O/E - retina normal                                               | Probable |
| 2BBI.00                                            | O/E - no retinopathy                                              | Definite |
| 3128000                                            | Fundoscopy normal                                                 | Probable |
| 3128200                                            | Dilated fundoscopy normal                                         | Probable |
| 2BBM.00                                            | O/E - diabetic maculopathy absent both eyes                       | Possible |
| <b>Background Retinopathy (R1)</b>                 |                                                                   |          |
| 2BBP.00                                            | O/E - right eye background diabetic retinopathy                   | Definite |
| 2BBQ.00                                            | O/E - left eye background diabetic retinopathy                    | Definite |
| F420000                                            | Background diabetic retinopathy                                   | Definite |
| F421.00                                            | Other background retinopathy                                      | Definite |
| F421000                                            | Unspecified background retinopathy                                | Definite |
| F421z00                                            | Other background retinopathy NOS                                  | Definite |
| 2BB4.00                                            | O/E - retinal microaneurysms                                      | Definite |
| 2BBa.00                                            | O/E- non-referable retinopathy                                    | Probable |
| <b>Pre proliferative Diabetic Retinopathy (R2)</b> |                                                                   |          |
| F420200                                            | Pre proliferative diabetic retinopathy                            | Definite |
| 2BBR.00                                            | O/E - right eye pre proliferative diabetic retinopathy            | Definite |
| 2BBS.00                                            | O/E - left eye pre proliferative diabetic retinopathy             | Definite |
| F420800                                            | High risk non proliferative diabetic retinopathy                  | Definite |
| <b>Proliferative Diabetic Retinopathy (R3)</b>     |                                                                   |          |
| 2BBk.00                                            | O/E - right eye stable treated proliferative diabetic retinopathy | Definite |
| 2BBI.00                                            | O/E - left eye stable treated proliferative diabetic retinopathy  | Definite |
| F420100                                            | Proliferative diabetic retinopathy                                | Definite |
| F420700                                            | High risk proliferative diabetic retinopathy                      | Definite |
| F422z00                                            | Proliferative retinopathy NOS                                     | Definite |
| F422.00                                            | Other proliferative retinopathy                                   | Definite |
| FyuF700                                            | [X]Other proliferative retinopathy                                | Definite |
| 2BBT.00                                            | O/E - right eye proliferative diabetic retinopathy                | Definite |
| 2BBV.00                                            | O/E - left eye proliferative diabetic retinopathy                 | Definite |
| 7272500                                            | Panretinal laser photocoagulation to lesion of retina NEC         | Definite |
| 7272800                                            | Panretinal laser photocoagulation to lesion of retina             | Definite |
| 2BB7.00                                            | O/E - retinal vascular proliferative                              | Probable |
| 2BB8.00                                            | O/E - vitreous haemorrhages                                       | Probable |
| 7276                                               | Pan retinal photocoagulation for diabetes                         | Definite |
| F420500                                            | Advanced diabetic retinal disease                                 | Possible |
| F422y00                                            | Other specified other proliferative retinopathy                   | Definite |

|         |                                                          |          |
|---------|----------------------------------------------------------|----------|
| F4K2800 | Vitreous haemorrhage                                     | Probable |
| FyuH400 | [X]Vitreous haemorrhage in diseases classified elsewhere | Probable |
| 2BB8.00 | O/E - vitreous haemorrhages                              | Probable |

### Diabetic Maculopathy (M1)

|         |                                                       |          |
|---------|-------------------------------------------------------|----------|
| 2BBL.00 | O/E - Diabetic maculopathy present both eyes          | Definite |
| 2BBm.00 | O/E - right eye clinically significant macular oedema | Definite |
| 2BBn.00 | O/E - left eye clinically significant macular oedema  | Definite |
| 2BBW.00 | O/E - right eye diabetic maculopathy                  | Definite |
| 2BBX.00 | O/E - left eye diabetic maculopathy                   | Definite |
| F425900 | Maculopathy                                           | Definite |
| F42y900 | Macular oedema                                        | Definite |
| C10EP00 | Type 1 diabetes mellitus with exudative maculopathy   | Definite |
| C10EP11 | Type I diabetes mellitus with exudative maculopathy   | Definite |
| C10FQ00 | Type 2 diabetes mellitus with exudative maculopathy   | Definite |
| C10FQ11 | Type II diabetes mellitus with exudative maculopathy  | Definite |
| F420300 | Advanced diabetic maculopathy                         | Definite |
| 7272900 | Focal laser photocoagulation of retina                | Probable |
| F420400 | Diabetic maculopathy                                  | Definite |

### Referrable Retinopathy (R2, R3, M1)

|         |                                              |          |
|---------|----------------------------------------------|----------|
| 2BBY.00 | O/E - referable retinopathy                  | Definite |
| 2BBo.00 | O/E - sight threatening diabetic retinopathy | Definite |

### Advanced diabetic retinal disease

|         |                                   |          |
|---------|-----------------------------------|----------|
| F420500 | Advanced diabetic retinal disease | Definite |
|---------|-----------------------------------|----------|

| Code                    | Description                                                       | Status   |
|-------------------------|-------------------------------------------------------------------|----------|
| <b>Laser Procedures</b> |                                                                   |          |
| 7276                    | Pan retinal photocoagulation for diabetes                         | Definite |
| 7272012                 | Photocoagulation of the retina NEC                                | Definite |
| 7272013                 | Laser therapy lesion of retina                                    | Definite |
| 7272300                 | Laser destruction of lesion of retina                             | Definite |
| 7272500                 | Pan retinal laser photocoagulation to lesion of retina NEC        | Definite |
| 7272600                 | Laser photocoagulation to lesion of retina NEC                    | Definite |
| 7272800                 | Pan retinal laser photocoagulation to lesion of retina            | Definite |
| 7272900                 | Focal laser photocoagulation of retina                            | Definite |
| 2BBk.00                 | O/E - right eye stable treated proliferative diabetic retinopathy | Definite |
| 2BBI.00                 | O/E - left eye stable treated proliferative diabetic retinopathy  | Definite |
| 2BBO.00                 | O/E - Laser photocoagulation scars                                | Definite |
| 5B4..11                 | Retinal laser therapy                                             | Definite |
| Z6F..11                 | Laser therapy                                                     | Definite |



|                                                      |                                                                 |          |
|------------------------------------------------------|-----------------------------------------------------------------|----------|
| 5B42.00                                              | Laser therapy - retinal lesion                                  | Definite |
| <b>Vitreous/ Peribulbar procedures / haemorrhage</b> |                                                                 |          |
| 7270D00                                              | Injection of Ranibizumab into vitreous body                     | Definite |
| 7270z00                                              | Operation on vitreous body NOS                                  | Definite |
| 7270300                                              | Injection into vitreous body NEC                                | Definite |
| 7274800                                              | Injection of therapeutic substance around the eye               | Possible |
| 727C200                                              | Injection therapeutic substance posterior segment of eye<br>NEC | Definite |
| 7270D00                                              | Injection of Ranibizumab into vitreous body                     | Definite |
| 7L19E00                                              | Injection of triamcinolone                                      | Probable |
| 727C100                                              | Injection of steroid into posterior segment of eye              | Definite |
| 7270200                                              | Injection of vitreous substitute into vitreous body             | Definite |
| 7277600                                              | Injection of therapeutic substance into macula                  | Definite |
| 7270C00                                              | Injection of vitreous substitute into vitreous body NEC         | Definite |
| 727C100                                              | Injection of steroid into posterior segment of eye              | Definite |
| 7270400                                              | Pars plana vitrectomy                                           | Definite |
| 727Cy00                                              | Other specified operations on posterior segment of eye          | Probable |
| 727Cz00                                              | Operations on posterior segment of eye NOS                      | Probable |
| 7273000                                              | Epiretinal dissection                                           | Possible |
| 727C000                                              | Insertion sustained release device posterior segment of<br>eye  | Definite |
| 7270y00                                              | Other specified operation on vitreous body                      | Definite |
| 7270800                                              | Internal tamponade of retina using liquid                       | Possible |
| 7270900                                              | Internal tamponade of retina using oil                          | Possible |
| 7270A00                                              | Removal of internal tamponade agent from vitreous body          | Possible |
| 7270411                                              | Vitrectomy using pars plana approach                            | Probable |
| 7270500                                              | Air/gas exchange of vitreous                                    | Possible |
| 7270600                                              | Internal tamponade of retina using gas                          | Probable |
| 7270200                                              | Injection of vitreous substitute into vitreous body             | Probable |
| 7270300                                              | Injection into vitreous body NEC                                | Definite |
| 7270400                                              | Pars plana vitrectomy                                           | Definite |
| 7270                                                 | Operations on vitreous body                                     | Probable |
| 7270100                                              | Extirpation of vitreous body NEC                                | Probable |
| F4K2800                                              | Vitreous haemorrhage                                            | Definite |
| FyuH400                                              | [X]Vitreous haemorrhage in diseases classified elsewhere        | Definite |
| 2BB8.00                                              | O/E - vitreous haemorrhages                                     | Definite |
| <b>Vision loss / blindness</b>                       |                                                                 |          |
| ZV52200                                              | [V]Fitting or adjustment of artificial eye                      | Probable |
| ZV43000                                              | [V]Has artificial eye globe                                     | Probable |
| ZV43100                                              | [V]Has artificial eye lens                                      | Possible |
| FyuL.00                                              | [X]Visual disturbances and blindness                            | Definite |
| F49z.11                                              | Acquired blindness                                              | Definite |
| F490900                                              | Acquired blindness, both eyes                                   | Definite |
| F495A00                                              | Acquired blindness, one eye                                     | Definite |

|    |         |                                                             |          |
|----|---------|-------------------------------------------------------------|----------|
| 1  |         |                                                             |          |
| 2  |         |                                                             |          |
| 3  |         |                                                             |          |
| 4  | F491.00 | Better eye: low vision, Lesser eye: profound VI             | Definite |
| 5  | F491500 | Better eye: moderate VI, Lesser eye: blind, unspecified     | Definite |
| 6  |         |                                                             |          |
| 7  | F492300 | Better eye: moderate VI, Lesser eye: low vision unspecified | Definite |
| 8  |         |                                                             |          |
| 9  | F492500 | Better eye: moderate VI, Lesser eye: moderate VI            | Definite |
| 10 | F491700 | Better eye: moderate VI, Lesser eye: near total VI          | Definite |
| 11 |         |                                                             |          |
| 12 | F491800 | Better eye: moderate VI, Lesser eye: profound VI            | Definite |
| 13 | F492400 | Better eye: moderate VI, Lesser eye: severe VI              | Definite |
| 14 | F491600 | Better eye: moderate VI, Lesser eye: total VI               | Definite |
| 15 | F490400 | Better eye: near total VI, Lesser eye: near total VI        | Definite |
| 16 |         |                                                             |          |
| 17 | F490300 | Better eye: near total VI, Lesser eye: total VI             | Definite |
| 18 | F490200 | Better eye: near total VI, Lesser eye: unspecified          | Definite |
| 19 | F490700 | Better eye: profound VI, Lesser eye: near total VI          | Definite |
| 20 | F490800 | Better eye: profound VI, Lesser eye: profound VI            | Definite |
| 21 |         |                                                             |          |
| 22 | F490600 | Better eye: profound VI, Lesser eye: total VI               | Definite |
| 23 | F490500 | Better eye: profound VI, Lesser eye: unspecified            | Definite |
| 24 | F491100 | Better eye: severe VI, Lesser eye: blind, unspecified       | Definite |
| 25 | F492100 | Better eye: severe VI, Lesser eye: low vision unspecified   | Definite |
| 26 |         |                                                             |          |
| 27 | F491300 | Better eye: severe VI, Lesser eye: near total VI            | Definite |
| 28 | F491400 | Better eye: severe VI, Lesser eye: profound VI              | Definite |
| 29 | F492200 | Better eye: severe VI, Lesser eye: severe VI                | Definite |
| 30 | F491200 | Better eye: severe VI, Lesser eye: total VI                 | Definite |
| 31 |         |                                                             |          |
| 32 | 8F62.00 | Blind lead dog rehabilitation                               | Definite |
| 33 | 8F6..11 | Blind rehabilitation                                        | Definite |
| 34 | 8F61.00 | Blind rehabilitation                                        | Definite |
| 35 |         |                                                             |          |
| 36 | ZN56800 | Blind telephone user                                        | Definite |
| 37 | F49..00 | Blindness and low vision                                    | Definite |
| 38 | F490z00 | Blindness both eyes NOS                                     | Definite |
| 39 | F490.00 | Blindness, both eyes                                        | Definite |
| 40 | F49A.00 | Blindness, monocular                                        | Definite |
| 41 |         |                                                             |          |
| 42 | F495000 | Blindness, one eye, unspecified                             | Definite |
| 43 | F490100 | Both eyes total visual impairment                           | Definite |
| 44 | 668C.00 | Certificate of vision impairment                            | Definite |
| 45 | Fy1..00 | Combined visual and hearing impairment                      | Definite |
| 46 |         |                                                             |          |
| 47 | Fy1..12 | Deafblind                                                   | Definite |
| 48 | ZN56A00 | Deaf-blind telephone user                                   | Definite |
| 49 | Fy1..11 | Dual sensory impairment - deafblind                         | Definite |
| 50 | 9m08.00 | Exclu diab ret screen as blind                              | Definite |
| 51 |         |                                                             |          |
| 52 | 2BBr.00 | Impair vision due diab retinop                              | Definite |
| 53 | F49..11 | Impaired vision                                             | Definite |
| 54 | ZK74.00 | Issue of local authority blind registration                 | Definite |
| 55 | F494.00 | Legal blindness USA                                         | Definite |
| 56 |         |                                                             |          |
| 57 | F496500 | Lesser eye: moderate VI, Better eye: near normal vision     | Definite |
| 58 | F496600 | Lesser eye: moderate VI, Better eye: normal vision          | Definite |
| 59 |         |                                                             |          |
| 60 |         |                                                             |          |

1  
2  
3  
4  
5  
6  
7  
8  
9  
10  
11  
12  
13  
14  
15  
16  
17  
18  
19  
20  
21  
22  
23  
24  
25  
26  
27  
28  
29  
30  
31  
32  
33  
34  
35  
36  
37  
38  
39  
40  
41  
42  
43  
44  
45  
46  
47  
48  
49  
50  
51  
52  
53  
54  
55  
56  
57  
58  
59  
60

|         |                                                              |          |
|---------|--------------------------------------------------------------|----------|
| F496400 | Lesser eye: moderate VI, Better eye: unspecified             | Definite |
| F495500 | Lesser eye: near total VI, Better eye: near normal vision    | Definite |
| F495600 | Lesser eye: near total VI, Better eye: normal vision         | Definite |
| F495400 | Lesser eye: near total VI, Better eye: unspecified           | Definite |
| F495800 | Lesser eye: profound VI, Better eye: near normal vision      | Definite |
| F495900 | Lesser eye: profound VI, Better eye: normal vision           | Definite |
| F495700 | Lesser eye: profound VI, Better eye: unspecified             | Definite |
| F496200 | Lesser eye: severe VI, Better eye: near normal vision        | Definite |
| F496300 | Lesser eye: severe VI, Better eye: normal vision             | Definite |
| F496100 | Lesser eye: severe VI, Better eye: unspecified               | Definite |
| F495200 | Lesser eye: total VI, Better eye: near normal vision         | Definite |
| F495300 | Lesser eye: total VI, Better eye: normal vision              | Definite |
| F495100 | Lesser eye: total visual impairment, Better eye: unspecified | Definite |
| F49..12 | Low vision                                                   | Definite |
| F492.00 | Low vision, both eyes                                        | Definite |
| F492z00 | Low vision, both eyes NOS                                    | Definite |
| F492000 | Low vision, both eyes unspecified                            | Definite |
| F496.00 | Low vision, one eye                                          | Definite |
| F496z00 | Low vision, one eye NOS                                      | Definite |
| F496000 | Low vision, one eye, unspecified                             | Definite |
| F498.00 | Moderate visual impairment, binocular                        | Definite |
| F49C.00 | Moderate visual impairment, monocular                        | Definite |
| 2B7A.11 | O/E - blind L-eye                                            | Definite |
| 2B6A.11 | O/E - blind R-eye                                            | Definite |
| 22E6.11 | O/E - false eye                                              | Definite |
| 22E6.00 | O/E - glass (prosthetic) eye                                 | Definite |
| 22E6.12 | O/E - glass eye                                              | Definite |
| 22EF.00 | O/E - has one eye                                            | Definite |
| 2B7B.00 | O/E - L-eye completely blind                                 | Definite |
| 2B7C.00 | O/E - L-eye sees hand movements                              | Definite |
| 2B7T.00 | O/E - L-eye visual acuity (corrected) 1/60                   | Definite |
| 2B7V.00 | O/E - L-eye visual acuity (corrected) 2/60                   | Definite |
| 2B7W.00 | O/E - L-eye visual acuity (corrected) 4/60                   | Definite |
| 2B7X.00 | O/E - L-eye visual acuity (corrected) 5/60                   | Definite |
| 2B7S.00 | O/E - pinhole L-eye completely blind                         | Definite |
| 2B7Q.00 | O/E - pinhole L-eye counts fingers only                      | Definite |
| 2B7R.00 | O/E - pinhole L-eye perceives light only                     | Definite |
| 2B7P.00 | O/E - pinhole L-eye sees hand movements                      | Definite |
| 2B6S.00 | O/E - pinhole R-eye completely blind                         | Definite |
| 2B6Q.00 | O/E - pinhole R-eye counts fingers only                      | Definite |
| 2B6R.00 | O/E - pinhole R-eye perceives light only                     | Definite |
| 2B6P.00 | O/E - pinhole R-eye sees hand movements                      | Definite |
| 2B7L.00 | O/E - pinhole visual acuity L-eye=6/60                       | Definite |

|    |         |                                                             |          |
|----|---------|-------------------------------------------------------------|----------|
| 1  |         |                                                             |          |
| 2  |         |                                                             |          |
| 3  |         |                                                             |          |
| 4  | 2B6L.00 | O/E - pinhole visual acuity R-eye=6/60                      | Definite |
| 5  | 22E6.13 | O/E - prosthetic eye                                        | Definite |
| 6  | 2B6B.00 | O/E - R-eye completely blind                                | Definite |
| 7  | 2B6C.00 | O/E - R-eye sees hand movements                             | Definite |
| 8  | 2B6T.00 | O/E - R-eye visual acuity (corrected) 1/60                  | Definite |
| 9  | 2B6V.00 | O/E - R-eye visual acuity (corrected) 2/60                  | Definite |
| 10 | 2B6W.00 | O/E - R-eye visual acuity (corrected) 4/60                  | Definite |
| 11 | 2B6X.00 | O/E - R-eye visual acuity (corrected) 5/60                  | Definite |
| 12 | 2B7E.00 | O/E - visual acuity L-eye=3/60                              | Definite |
| 13 | 2B78.00 | O/E - visual acuity L-eye=6/60                              | Definite |
| 14 | 2B6E.00 | O/E - visual acuity R-eye=3/60                              | Definite |
| 15 | 2B68.00 | O/E - visual acuity R-eye=6/60                              | Definite |
| 16 | 2B79.00 | O/E -L-eye counts fingers only                              | Definite |
| 17 | 2B69.00 | O/E -R-eye counts fingers only                              | Definite |
| 18 | 2B7A.00 | O/E-L-eye perceives light only                              | Definite |
| 19 | 2B6A.00 | O/E-R-eye perceives light only                              | Definite |
| 20 | F491000 | One eye blind, one eye low vision                           | Definite |
| 21 | F491z00 | One eye blind, one eye low vision NOS                       | Definite |
| 22 | Z9E2.00 | Optical low vision aid provision                            | Definite |
| 23 | F49..13 | Partial sight                                               | Definite |
| 24 | F495z00 | Profound impairment one eye NOS                             | Definite |
| 25 | F495.00 | Profound impairment, one eye                                | Definite |
| 26 | Z96..00 | Provision for visual and hearing impairment                 | Definite |
| 27 | Z9E5400 | Provision of ancillary low vision aid                       | Definite |
| 28 | Z9E1100 | Provision of artificial eye                                 | Definite |
| 29 | Z962.00 | Provision of communicator for visual and hearing impairment | Definite |
| 30 | Z9E5100 | Provision of electronic low vision aid                      | Definite |
| 31 | Z961.00 | Provision of guide help for visual and hearing impairment   | Definite |
| 32 | Z9E3200 | Provision of low vision hand magnifier                      | Definite |
| 33 | Z9E3400 | Provision of low vision headband magnifier                  | Definite |
| 34 | Z9E3300 | Provision of low vision stand magnifier                     | Definite |
| 35 | Z9E3100 | Provision of magnifier low vision aid - near                | Definite |
| 36 | Z9E5.00 | Provision of non-optical low vision aid                     | Definite |
| 37 | Z9E4.00 | Provision of optical low vision aid - distance              | Definite |
| 38 | Z9E3.00 | Provision of optical low vision aid - near                  | Definite |
| 39 | Z9E1200 | Provision of removable artificial eye                       | Definite |
| 40 | Z9E3500 | Provision of spectacle low vision aid - near                | Definite |
| 41 | 8HIE.00 | Referral to visual impairment multidisciplinary team        | Definite |
| 42 | 6689    | Registered blind                                            | Definite |
| 43 | 6688.11 | Registered partially blind                                  | Definite |
| 44 | 6688    | Registered partially sighted                                | Definite |
| 45 | 6689.11 | Registered severely sight impaired                          | Definite |
| 46 | 668D.00 | Registered sight impaired                                   | Definite |
| 47 |         |                                                             |          |
| 48 |         |                                                             |          |
| 49 |         |                                                             |          |
| 50 |         |                                                             |          |
| 51 |         |                                                             |          |
| 52 |         |                                                             |          |
| 53 |         |                                                             |          |
| 54 |         |                                                             |          |
| 55 |         |                                                             |          |
| 56 |         |                                                             |          |
| 57 |         |                                                             |          |
| 58 |         |                                                             |          |
| 59 |         |                                                             |          |
| 60 |         |                                                             |          |

|    |         |                                                     |          |
|----|---------|-----------------------------------------------------|----------|
| 1  |         |                                                     |          |
| 2  |         |                                                     |          |
| 3  |         |                                                     |          |
| 4  | 8D36.00 | Removable artificial eye                            | Definite |
| 5  | 9Nfb.00 | Requires deafblind block alphabet interpreter       | Definite |
| 6  | 9NfB.00 | Requires deafblind communicator guide               | Definite |
| 7  | 9Nfc.00 | Requires deafblind haptic communication interpreter | Definite |
| 8  | 9Nfa.00 | Requires deafblind manual alphabet interpreter      | Definite |
| 9  |         |                                                     |          |
| 10 | F497.00 | Severe visual impairment, binocular                 | Definite |
| 11 | F49B.00 | Severe visual impairment, monocular                 | Definite |
| 12 | F49..14 | Sight impaired                                      | Definite |
| 13 | F490000 | Unspecified blindness both eyes                     | Definite |
| 14 | 1a00000 | Uses guide dog for the blind                        | Definite |
| 15 | F49D.00 | Visual impairment                                   | Definite |
| 16 | F493.00 | Visual loss, both eyes unqualified                  | Definite |
| 17 | F49y.00 | Visual loss, one eye, unqualified                   | Definite |
| 18 | F404200 | Blind hypertensive eye                              | Definite |
| 19 | F404100 | Blind hypotensive eye                               | Definite |
| 20 | Z9E3900 | Near low vision aid - clip-on spectacle magnifier   | Definite |
| 21 | Z9E3C00 | Near low vision aid - clip-on spectacle telescope   | Definite |
| 22 | Z9E3D00 | Near low vision aid - extra cap for telescope       | Definite |
| 23 | Z9E3800 | Near low vision aid - integral spectacle magnifier  | Definite |
| 24 | Z9E3B00 | Near low vision aid - integral spectacle telescope  | Definite |
| 25 | 9NID.00 | Seen by visual impairment teacher                   | Definite |
| 26 | 1B75.00 | Loss of vision, Severe visual loss                  | Definite |
| 27 | 1B77.00 | Deteriorating vision, Severe visual loss            | Definite |
| 28 |         |                                                     |          |
| 29 |         |                                                     |          |
| 30 |         |                                                     |          |
| 31 |         |                                                     |          |
| 32 |         |                                                     |          |
| 33 |         |                                                     |          |
| 34 |         |                                                     |          |
| 35 |         |                                                     |          |
| 36 |         |                                                     |          |
| 37 |         |                                                     |          |
| 38 |         |                                                     |          |
| 39 |         |                                                     |          |
| 40 |         |                                                     |          |
| 41 |         |                                                     |          |
| 42 |         |                                                     |          |
| 43 |         |                                                     |          |
| 44 |         |                                                     |          |
| 45 |         |                                                     |          |
| 46 |         |                                                     |          |
| 47 |         |                                                     |          |
| 48 |         |                                                     |          |
| 49 |         |                                                     |          |
| 50 |         |                                                     |          |
| 51 |         |                                                     |          |
| 52 |         |                                                     |          |
| 53 |         |                                                     |          |
| 54 |         |                                                     |          |
| 55 |         |                                                     |          |
| 56 |         |                                                     |          |
| 57 |         |                                                     |          |
| 58 |         |                                                     |          |
| 59 |         |                                                     |          |
| 60 |         |                                                     |          |

### Unclassifiable

| Code    | Description                                                   |
|---------|---------------------------------------------------------------|
| 2BB5.00 | O/E - retinal haemorrhages                                    |
| 2BB6.00 | O/E - retinal exudates                                        |
| 2BBF.00 | Retinal abnormality-diabetes related                          |
| 2BBr.00 | Impaired vision due diab retinop                              |
| C105.00 | Diabetes mellitus with ophthalmic manifestation               |
| C105000 | Diabetes mellitus, juvenile type, + ophthalmic manifestation  |
| C105100 | Diabetes mellitus, adult onset, + ophthalmic manifestation    |
| C105y00 | Other specified diabetes mellitus with ophthalmic complicatn  |
| C105z00 | Diabetes mellitus NOS with ophthalmic manifestation           |
| C108100 | Insulin-dependent diabetes mellitus with ophthalmic comps     |
| C108111 | Type I diabetes mellitus with ophthalmic complications        |
| C108112 | Type 1 diabetes mellitus with ophthalmic complications        |
| C108700 | Insulin dependent diabetes mellitus with retinopathy          |
| C108711 | Type I diabetes mellitus with retinopathy                     |
| C108712 | Type 1 diabetes mellitus with retinopathy                     |
| C109100 | Non-insulin-dependent diabetes mellitus with ophthalmic comps |

|    |         |                                                               |
|----|---------|---------------------------------------------------------------|
| 1  |         |                                                               |
| 2  |         |                                                               |
| 3  |         |                                                               |
| 4  | C109111 | Type II diabetes mellitus with ophthalmic complications       |
| 5  | C109112 | Type 2 diabetes mellitus with ophthalmic complications        |
| 6  | C109600 | Non-insulin-dependent diabetes mellitus with retinopathy      |
| 7  | C109611 | Type II diabetes mellitus with retinopathy                    |
| 8  | C109612 | Type 2 diabetes mellitus with retinopathy                     |
| 9  |         |                                                               |
| 10 | C10A300 | Malnutrit-related diabetes mellitus with ophthalmic complicat |
| 11 | C10E100 | Type 1 diabetes mellitus with ophthalmic complications        |
| 12 | C10E111 | Type I diabetes mellitus with ophthalmic complications        |
| 13 | C10E112 | Insulin-dependent diabetes mellitus with ophthalmic comp      |
| 14 |         |                                                               |
| 15 | C10E700 | Type 1 diabetes mellitus with retinopathy                     |
| 16 | C10E711 | Type I diabetes mellitus with retinopathy                     |
| 17 | C10E712 | Insulin dependent diabetes mellitus with retinopathy          |
| 18 | C10F600 | Type 2 diabetes mellitus with retinopathy                     |
| 19 | C10F611 | Type II diabetes mellitus with retinopathy                    |
| 20 |         |                                                               |
| 21 | F420.00 | Diabetic retinopathy                                          |
| 22 | F420600 | Non proliferative diabetic retinopathy                        |
| 23 | F420z00 | Diabetic retinopathy NOS                                      |
| 24 | F421.11 | Microvascular retinal changes                                 |
| 25 |         |                                                               |
| 26 | 2BB5.00 | O/E - retinal haemorrhages                                    |
| 27 | 2BBM.00 | O/E - diabetic maculopathy absent both eyes                   |
| 28 |         |                                                               |
| 29 |         |                                                               |
| 30 |         |                                                               |
| 31 |         |                                                               |
| 32 |         |                                                               |
| 33 |         |                                                               |
| 34 |         |                                                               |
| 35 |         |                                                               |
| 36 |         |                                                               |
| 37 |         |                                                               |
| 38 |         |                                                               |
| 39 |         |                                                               |
| 40 |         |                                                               |
| 41 |         |                                                               |
| 42 |         |                                                               |
| 43 |         |                                                               |
| 44 |         |                                                               |
| 45 |         |                                                               |
| 46 |         |                                                               |
| 47 |         |                                                               |
| 48 |         |                                                               |
| 49 |         |                                                               |
| 50 |         |                                                               |
| 51 |         |                                                               |
| 52 |         |                                                               |
| 53 |         |                                                               |
| 54 |         |                                                               |
| 55 |         |                                                               |
| 56 |         |                                                               |
| 57 |         |                                                               |
| 58 |         |                                                               |
| 59 |         |                                                               |
| 60 |         |                                                               |



#### Appendix 4: Summary of Prevalence Trends 1998 to 2018

| Decade                            | Prevalence estimate at the start of the decade | Prevalence estimate at the end of the decade | Percentage increase in prevalence within the decade | Percentage increase in prevalence between the decades |
|-----------------------------------|------------------------------------------------|----------------------------------------------|-----------------------------------------------------|-------------------------------------------------------|
| <b>STR in T1DM in two decades</b> |                                                |                                              |                                                     |                                                       |
| 1998 to 2007                      | 8.15                                           | 17.57                                        | 216%                                                |                                                       |
| 2009 to 2018                      | 20.54                                          | 30.22                                        | 147%                                                | 371%                                                  |
| <b>STR in T2DM in two decades</b> |                                                |                                              |                                                     |                                                       |
| 1998 to 2007                      | 4.36                                           | 8.1                                          | 186%                                                |                                                       |
| 2009 to 2018                      | 9.01                                           | 11.15                                        | 124%                                                | 256%                                                  |
| <b>DR in T1DM in two decades</b>  |                                                |                                              |                                                     |                                                       |
| 1998 to 2007                      | 26.62                                          | 40.32                                        | 151%                                                |                                                       |
| 2009 to 2018                      | 45.39                                          | 57.75                                        | 127%                                                | 217%                                                  |
| <b>DR in T2DM in two decades</b>  |                                                |                                              |                                                     |                                                       |
| 1998 to 2007                      | 11.53                                          | 20.06                                        | 174%                                                |                                                       |
| 2009 to 2018                      | 23.7                                           | 32.64                                        | 138%                                                | 283%                                                  |
| <b>STR in DM in two decades</b>   |                                                |                                              |                                                     |                                                       |
| 1998 to 2007                      | 4.87                                           | 8.84                                         | 182%                                                |                                                       |
| 2009 to 2018                      | 9.86                                           | 12.48                                        | 127%                                                | 256%                                                  |
| <b>DR in DM in two decades</b>    |                                                |                                              |                                                     |                                                       |
| 1998 to 2007                      | 13.57                                          | 21.64                                        | 159%                                                |                                                       |
| 2009 to 2018                      | 25.3                                           | 34.39                                        | 136%                                                | 253%                                                  |
| <b>T1DM in two decades</b>        |                                                |                                              |                                                     |                                                       |
| 1998 to 2007                      | 0.31%                                          | 0.32%                                        | 104%                                                |                                                       |
| 2009 to 2018                      | 0.33%                                          | 0.41%                                        | 123%                                                | 132%                                                  |
| <b>T2DM in two decades</b>        |                                                |                                              |                                                     |                                                       |
| 1998 to 2007                      | 1.91%                                          | 3.65%                                        | 191%                                                |                                                       |
| 2009 to 2018                      | 4.01%                                          | 5.24%                                        | 131%                                                | 273%                                                  |

## Appendix 5: Future projections

In the four figures below, the grey area is the prediction band (95% confidence interval) and signifies the uncertainty of the estimates.

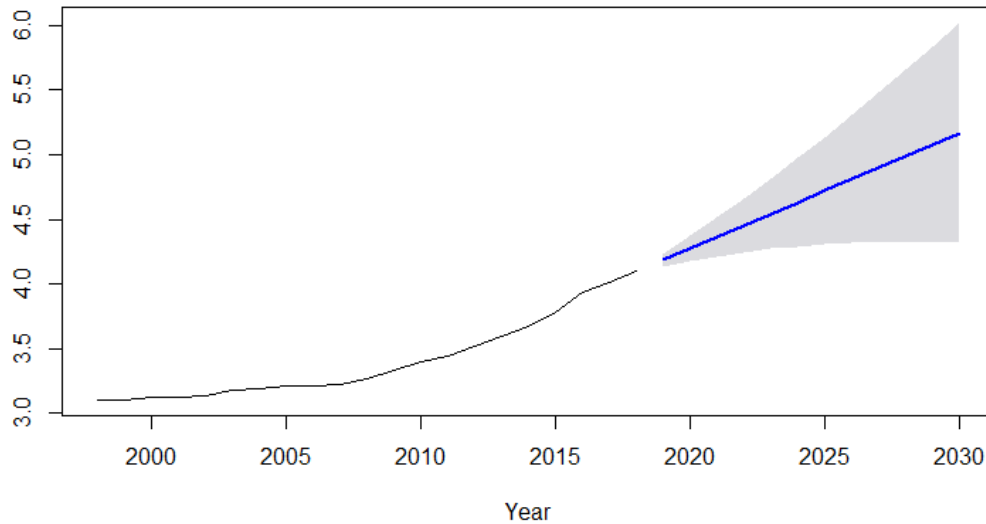

**Figure 1: T1DM Projections / 1000 individuals**

X axis is calendar years and Y axis is prevalence (cases per 1000 individuals general population), starts at 3.0



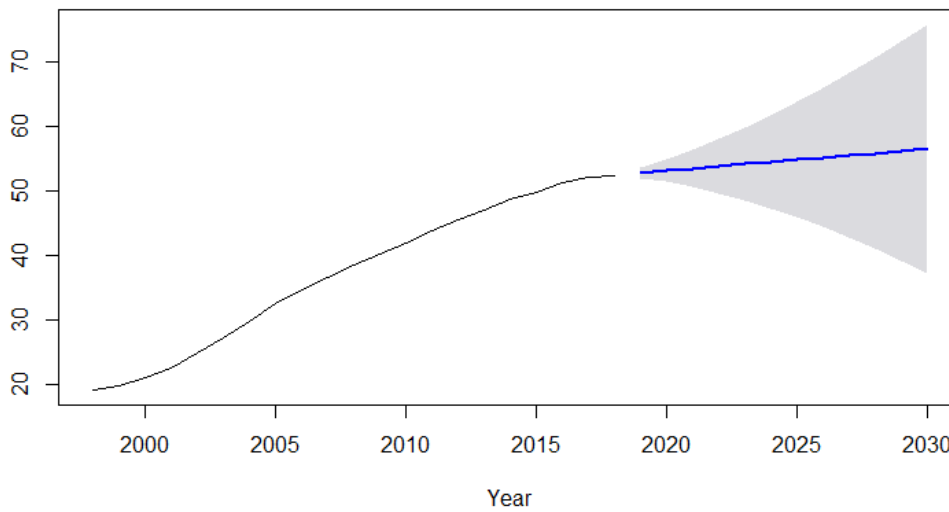

**Figure 2: T2DM Projections / 1000 individuals**

X axis is calendar years and Y axis is prevalence (cases per 1000 individuals general population) starts at 17

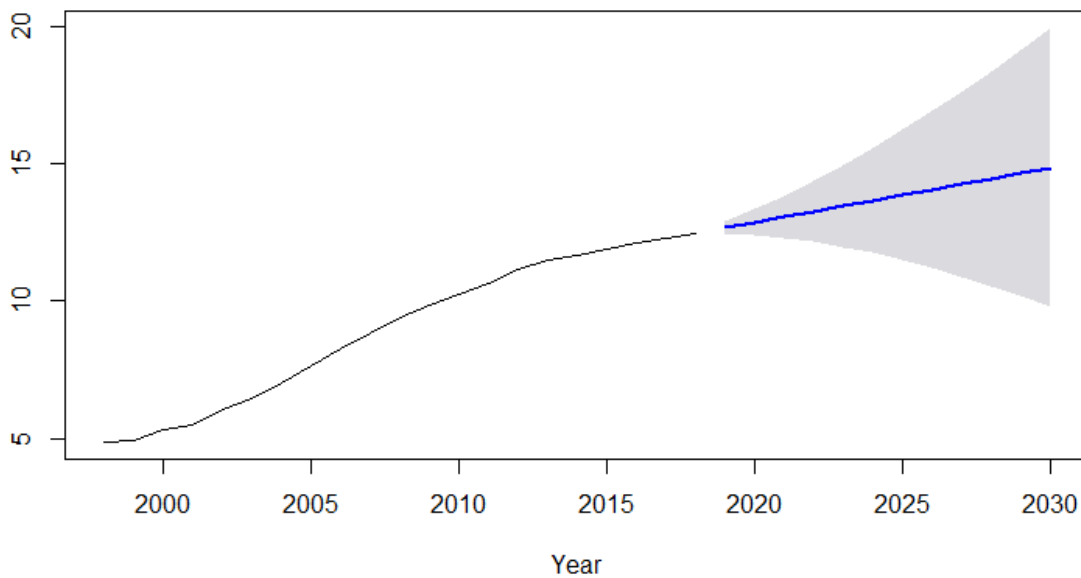

**Figure 3: STR Projections (%)**

X axis is calendar years and Y axis is prevalence (cases per 100 individuals with diabetes) starts at 4

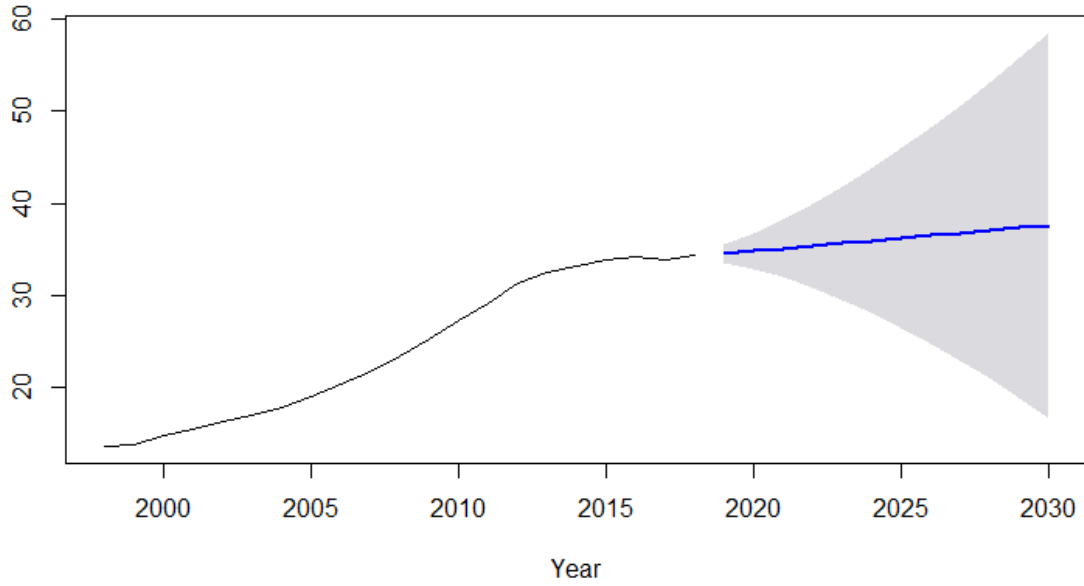

**Figure 4: DR Projections (%)**

X axis is calendar years and Y axis is prevalence (cases per 100 individuals with diabetes), starts at 10

review only

## Annual Prevalence Diabetes Mellitus per 1000 Population and Diabetic Retinopathy per 100 diabetic population (95% PI)

| Year | T1DM Forecast |        |         | T2DM Forecast |        |         | DR Forecast |        |         | STR Forecast |        |         |
|------|---------------|--------|---------|---------------|--------|---------|-------------|--------|---------|--------------|--------|---------|
|      | Forecast      | Low 95 | High 95 | Forecast      | Low 95 | High 95 | Forecast    | Low 95 | High 95 | Forecast     | Low 95 | High 95 |
| 2019 | 4.2           | 4.1    | 4.2     | 52.7          | 51.9   | 53.6    | 34.5        | 33.5   | 35.5    | 12.7         | 12.4   | 12.9    |
| 2020 | 4.3           | 4.2    | 4.4     | 53.1          | 51.4   | 54.8    | 34.8        | 32.9   | 36.7    | 12.9         | 12.4   | 13.3    |
| 2021 | 4.4           | 4.2    | 4.5     | 53.4          | 50.6   | 56.3    | 35.1        | 31.9   | 38.2    | 13.1         | 12.3   | 13.8    |
| 2022 | 4.5           | 4.2    | 4.7     | 53.8          | 49.6   | 57.9    | 35.4        | 30.8   | 39.9    | 13.3         | 12.2   | 14.4    |
| 2023 | 4.5           | 4.3    | 4.8     | 54.1          | 48.5   | 59.7    | 35.6        | 29.5   | 41.8    | 13.5         | 12.0   | 15.0    |
| 2024 | 4.6           | 4.3    | 5.0     | 54.4          | 47.2   | 61.6    | 35.9        | 28.1   | 43.8    | 13.7         | 11.8   | 15.6    |
| 2025 | 4.7           | 4.3    | 5.1     | 54.8          | 45.8   | 63.7    | 36.2        | 26.5   | 45.9    | 13.9         | 11.5   | 16.2    |
| 2026 | 4.8           | 4.3    | 5.3     | 55.1          | 44.3   | 65.9    | 36.5        | 24.7   | 48.2    | 14.1         | 11.2   | 16.9    |
| 2027 | 4.9           | 4.3    | 5.5     | 55.4          | 42.7   | 68.2    | 36.8        | 22.9   | 50.6    | 14.3         | 10.9   | 17.6    |
| 2028 | 5.0           | 4.3    | 5.7     | 55.8          | 41.0   | 70.6    | 37.0        | 20.9   | 53.2    | 14.5         | 10.5   | 18.4    |
| 2029 | 5.1           | 4.3    | 5.8     | 56.1          | 39.1   | 73.1    | 37.3        | 18.8   | 55.8    | 14.7         | 10.2   | 19.1    |
| 2030 | 5.2           | 4.3    | 6.0     | 56.4          | 37.2   | 75.7    | 37.6        | 16.7   | 58.5    | 14.9         | 9.8    | 19.9    |

## Appendix 6: Previous prevalence studies compared with IMRD based analysis

| Publication                        | Population                                                                                                                  | T1DM                                   | T2DM                                                                                           | Any DM                                                                                                              |
|------------------------------------|-----------------------------------------------------------------------------------------------------------------------------|----------------------------------------|------------------------------------------------------------------------------------------------|---------------------------------------------------------------------------------------------------------------------|
| Younis et al (1)                   | Liverpool diabetic retinopathy screening programme 1991 to 1999 – baseline prevalence at entry into the programme           | Any DR 45.7%<br>STED 16.4%<br>PDR 3.7% | Any DR 25.3%<br>STED 6.0%<br>PDR 0.5%                                                          |                                                                                                                     |
| Misra et al (2)                    | Norwich Diabetic retinopathy screening programme 2006 with dynamic cohort design with repeated measures                     |                                        |                                                                                                | Any DR 25.6%<br>STDR 0.6%<br>PPDR 4.6%<br>PDR 0.08%<br>Maculopathy 0.44%<br>Referable (R2, R3, M1) retinopathy 4.7% |
| Thomas (3) and Minassian et al (4) | Welsh Diabetic retinopathy screening programme 2005 to 2009 and application to England                                      | Any DR 56.3%<br>STDR 11.2%             | Any DR 30.9%<br>STDR 2.9%                                                                      | Any DR 32.4%<br>STDR 3.4%<br>Diabetic Macular Oedema 7.12%                                                          |
| Looker et al (5)                   | Newly diagnosed type 2 diabetes attending Scottish National screening programme 2005 to 2008. prevalence at first screening |                                        | Any DR 19.3%<br>Referable DR 1.9%<br>PPDR ± any maculopathy 0.4%<br>PDR ± any maculopathy 0.3% |                                                                                                                     |

|                   |                                                       |                                                     |                                                    |                                                    |
|-------------------|-------------------------------------------------------|-----------------------------------------------------|----------------------------------------------------|----------------------------------------------------|
| Mathur et al (6)  | CPRD based UK wide study 2014 - crude prevalence rate | Any DR 54.8%<br>Severe DR 8.1%                      | Any DR 30.6%<br>Severe DR 1.2%                     | Any DR 32.6%<br>Severe DR 1.8%                     |
| The present study | IMRD based cross sectional study - 2017               | Any DR 57.8%<br>STR 30.2%<br>Any maculopathy 19.62% | Any DR 32.6%<br>STR 11.2%<br>Any maculopathy 6.99% | Any DR 34.4%<br>STR 12.3%<br>Any maculopathy 7.86% |

### References:

1. Younis N, Broadbent DM, Harding SP, Vora JR. Prevalence of diabetic eye disease in patients entering a systematic primary care-based eye screening programme. *Diabetic medicine : a journal of the British Diabetic Association.* 2002;19(12):1014-21.
2. Misra A, Bachmann MO, Greenwood RH, Jenkins C, Shaw A, Barakat O, et al. Trends in yield and effects of screening intervals during 17 years of a large UK community-based diabetic retinopathy screening programme. *Diabetic medicine : a journal of the British Diabetic Association.* 2009;26(10):1040-7.
3. Thomas RL, Dunstan FD, Luzio SD, Chowdhury SR, North RV, Hale SL, et al. Prevalence of diabetic retinopathy within a national diabetic retinopathy screening service. *The British journal of ophthalmology.* 2015;99(1):64-8.
4. Minassian DC, Owens DR, Reidy A. Prevalence of diabetic macular oedema and related health and social care resource use in England. *The British journal of ophthalmology.* 2012;96(3):345-9.
5. Looker H, Nyangoma S, Cromie D, Olson J, Leese G, Black M, et al. Diabetic retinopathy at diagnosis of type 2 diabetes in Scotland. *Diabetologia.* 2012;55(9):2335-42.
6. Mathur R, Bhaskaran K, Edwards E, Lee H, Chaturvedi N, Smeeth L, et al. Population trends in the 10-year incidence and prevalence of diabetic retinopathy in the UK: a cohort study in the Clinical Practice Research Datalink 2004-2014. *BMJ open.* 2017;7(2):e014444.

## Appendix 7: Previous publications reporting trends in prevalence rates of DR in the UK compared with IMRD based analysis

| Publication      | Population                                                                                                                      | T1DM                                                                                       | T2DM                                                                                                            | Any DM                                                                                       |
|------------------|---------------------------------------------------------------------------------------------------------------------------------|--------------------------------------------------------------------------------------------|-----------------------------------------------------------------------------------------------------------------|----------------------------------------------------------------------------------------------|
| Misra et al (1)  | Norwich Diabetic retinopathy screening programme 1990 to 2006 (Mostly Type 2) with dynamic cohort design with repeated measures |                                                                                            |                                                                                                                 | All DR prevalence increased from 23.2% to 25.3%<br><br>Referable DR increased from 2 to 4.7% |
| Mathur et al (2) | CPRD based UK wide study population from 2004 to 2014                                                                           | All DR remained stable at 55%<br><br>Severe DR increased from 3.5% in 2004 to 8.0% in 2014 | All DR reduced from 24.6% in 2004 to 23.1% in 2014<br><br>Severe DR increased from 0.3% in 2004 to 0.9% in 2014 | All DR prevalence decreased from 2.6% to 2.2%<br><br>Severe DR remained stable at 0.1%       |
| This study       | IMRD based serial cross-sectional studies 1998 to 2018                                                                          |                                                                                            |                                                                                                                 |                                                                                              |

### References:

1. Misra A, Bachmann MO, Greenwood RH, Jenkins C, Shaw A, Barakat O, et al. Trends in yield and effects of screening intervals during 17 years of a large UK community-based diabetic retinopathy screening programme. *Diabetic medicine : a journal of the British Diabetic Association.* 2009;26(10):1040-7.
2. Mathur R, Bhaskaran K, Edwards E, Lee H, Chaturvedi N, Smeeth L, et al. Population trends in the 10-year incidence and prevalence of diabetic retinopathy in the UK: a cohort study in the Clinical Practice Research Datalink 2004-2014. *BMJ open.* 2017;7(2):e014444.

# Reporting checklist for cross sectional study.

Based on the STROBE cross sectional guidelines.

## Instructions to authors

Complete this checklist by entering the page numbers from your manuscript where readers will find each of the items listed below.

Your article may not currently address all the items on the checklist. Please modify your text to include the missing information. If you are certain that an item does not apply, please write "n/a" and provide a short explanation.

Upload your completed checklist as an extra file when you submit to a journal.

In your methods section, say that you used the STROBE cross sectional reporting guidelines, and cite them as:

von Elm E, Altman DG, Egger M, Pocock SJ, Gotsche PC, Vandenbroucke JP. The Strengthening the Reporting of Observational Studies in Epidemiology (STROBE) Statement: guidelines for reporting observational studies.

|                           | Reporting Item                                                                                                      | Page Number |
|---------------------------|---------------------------------------------------------------------------------------------------------------------|-------------|
| <b>Title and abstract</b> |                                                                                                                     |             |
| Title                     | <a href="#">#1a</a> Indicate the study's design with a commonly used term in the title or the abstract              | 2           |
| Abstract                  | <a href="#">#1b</a> Provide in the abstract an informative and balanced summary of what was done and what was found | 2           |

|    |                      |                     |                                                            |      |
|----|----------------------|---------------------|------------------------------------------------------------|------|
| 1  | <b>Introduction</b>  |                     |                                                            |      |
| 2  |                      |                     |                                                            |      |
| 3  |                      |                     |                                                            |      |
| 4  | Background /         | <a href="#">#2</a>  | Explain the scientific background and rationale for the    | 4,5  |
| 5  | rationale            |                     | investigation being reported                               |      |
| 6  |                      |                     |                                                            |      |
| 7  |                      |                     |                                                            |      |
| 8  |                      |                     |                                                            |      |
| 9  | Objectives           | <a href="#">#3</a>  | State specific objectives, including any prespecified      | 5    |
| 10 |                      |                     | hypotheses                                                 |      |
| 11 |                      |                     |                                                            |      |
| 12 |                      |                     |                                                            |      |
| 13 |                      |                     |                                                            |      |
| 14 |                      |                     |                                                            |      |
| 15 | <b>Methods</b>       |                     |                                                            |      |
| 16 |                      |                     |                                                            |      |
| 17 |                      |                     |                                                            |      |
| 18 | Study design         | <a href="#">#4</a>  | Present key elements of study design early in the paper    | 2    |
| 19 |                      |                     |                                                            |      |
| 20 |                      |                     |                                                            |      |
| 21 | Setting              | <a href="#">#5</a>  | Describe the setting, locations, and relevant dates,       | 5-9  |
| 22 |                      |                     | including periods of recruitment, exposure, follow-up,     |      |
| 23 |                      |                     | and data collection                                        |      |
| 24 |                      |                     |                                                            |      |
| 25 |                      |                     |                                                            |      |
| 26 |                      |                     |                                                            |      |
| 27 |                      |                     |                                                            |      |
| 28 |                      |                     |                                                            |      |
| 29 | Eligibility criteria | <a href="#">#6a</a> | Give the eligibility criteria, and the sources and methods | 6-7  |
| 30 |                      |                     | of selection of participants.                              |      |
| 31 |                      |                     |                                                            |      |
| 32 |                      |                     |                                                            |      |
| 33 |                      |                     |                                                            |      |
| 34 |                      | <a href="#">#7</a>  | Clearly define all outcomes, exposures, predictors,        | NA   |
| 35 |                      |                     | potential confounders, and effect modifiers. Give          |      |
| 36 |                      |                     | diagnostic criteria, if applicable                         |      |
| 37 |                      |                     |                                                            |      |
| 38 |                      |                     |                                                            |      |
| 39 |                      |                     |                                                            |      |
| 40 |                      |                     |                                                            |      |
| 41 |                      |                     |                                                            |      |
| 42 | Data sources /       | <a href="#">#8</a>  | For each variable of interest give sources of data and     | NA   |
| 43 | measurement          |                     | details of methods of assessment (measurement).            |      |
| 44 |                      |                     | Describe comparability of assessment methods if there      |      |
| 45 |                      |                     | is more than one group. Give information separately for    |      |
| 46 |                      |                     | for exposed and unexposed groups if applicable.            |      |
| 47 |                      |                     |                                                            |      |
| 48 |                      |                     |                                                            |      |
| 49 |                      |                     |                                                            |      |
| 50 |                      |                     |                                                            |      |
| 51 |                      |                     |                                                            |      |
| 52 |                      |                     |                                                            |      |
| 53 |                      |                     |                                                            |      |
| 54 | Bias                 | <a href="#">#9</a>  | Describe any efforts to address potential sources of bias  | 5, 6 |
| 55 |                      |                     |                                                            |      |
| 56 |                      |                     |                                                            |      |
| 57 |                      |                     |                                                            |      |
| 58 |                      |                     |                                                            |      |
| 59 |                      |                     |                                                            |      |
| 60 |                      |                     |                                                            |      |



|    |                |                      |                                                            |              |
|----|----------------|----------------------|------------------------------------------------------------|--------------|
| 1  | Study size     | <a href="#">#10</a>  | Explain how the study size was arrived at                  | All eligible |
| 2  |                |                      |                                                            | patients     |
| 3  |                |                      |                                                            | included     |
| 4  |                |                      |                                                            |              |
| 5  |                |                      |                                                            |              |
| 6  |                |                      |                                                            |              |
| 7  |                |                      |                                                            |              |
| 8  |                |                      |                                                            |              |
| 9  | Quantitative   | <a href="#">#11</a>  | Explain how quantitative variables were handled in the     | 7            |
| 10 | variables      |                      | analyses. If applicable, describe which groupings were     |              |
| 11 |                |                      | chosen, and why                                            |              |
| 12 |                |                      |                                                            |              |
| 13 |                |                      |                                                            |              |
| 14 |                |                      |                                                            |              |
| 15 |                |                      |                                                            |              |
| 16 | Statistical    | <a href="#">#12a</a> | Describe all statistical methods, including those used to  | NA           |
| 17 | methods        |                      | control for confounding                                    |              |
| 18 |                |                      |                                                            |              |
| 19 |                |                      |                                                            |              |
| 20 |                |                      |                                                            |              |
| 21 |                |                      |                                                            |              |
| 22 | Statistical    | <a href="#">#12b</a> | Describe any methods used to examine subgroups and         | NA           |
| 23 | methods        |                      | interactions                                               |              |
| 24 |                |                      |                                                            |              |
| 25 |                |                      |                                                            |              |
| 26 |                |                      |                                                            |              |
| 27 | Statistical    | <a href="#">#12c</a> | Explain how missing data were addressed                    | NA           |
| 28 | methods        |                      |                                                            |              |
| 29 |                |                      |                                                            |              |
| 30 |                |                      |                                                            |              |
| 31 |                |                      |                                                            |              |
| 32 | Statistical    | <a href="#">#12d</a> | If applicable, describe analytical methods taking account  | NA           |
| 33 | methods        |                      | of sampling strategy                                       |              |
| 34 |                |                      |                                                            |              |
| 35 |                |                      |                                                            |              |
| 36 |                |                      |                                                            |              |
| 37 |                |                      |                                                            |              |
| 38 | Statistical    | <a href="#">#12e</a> | Describe any sensitivity analyses                          | NA           |
| 39 | methods        |                      |                                                            |              |
| 40 |                |                      |                                                            |              |
| 41 |                |                      |                                                            |              |
| 42 |                |                      |                                                            |              |
| 43 | <b>Results</b> |                      |                                                            |              |
| 44 |                |                      |                                                            |              |
| 45 |                |                      |                                                            |              |
| 46 | Participants   | <a href="#">#13a</a> | Report numbers of individuals at each stage of study—      | Figure 1     |
| 47 |                |                      | eg numbers potentially eligible, examined for eligibility, |              |
| 48 |                |                      | confirmed eligible, included in the study, completing      |              |
| 49 |                |                      | follow-up, and analysed. Give information separately for   |              |
| 50 |                |                      | for exposed and unexposed groups if applicable.            |              |
| 51 |                |                      |                                                            |              |
| 52 |                |                      |                                                            |              |
| 53 |                |                      |                                                            |              |
| 54 |                |                      |                                                            |              |
| 55 |                |                      |                                                            |              |
| 56 |                |                      |                                                            |              |
| 57 |                |                      |                                                            |              |
| 58 |                |                      |                                                            |              |
| 59 |                |                      |                                                            |              |
| 60 |                |                      |                                                            |              |

|    |                  |                      |                                                              |          |
|----|------------------|----------------------|--------------------------------------------------------------|----------|
| 1  | Participants     | <a href="#">#13b</a> | Give reasons for non-participation at each stage             | Figure 1 |
| 2  |                  |                      |                                                              |          |
| 3  |                  |                      |                                                              |          |
| 4  | Participants     | <a href="#">#13c</a> | Consider use of a flow diagram                               | Figure 1 |
| 5  |                  |                      |                                                              |          |
| 6  |                  |                      |                                                              |          |
| 7  | Descriptive data | <a href="#">#14a</a> | Give characteristics of study participants (eg               | Table 1  |
| 8  |                  |                      | demographic, clinical, social) and information on            |          |
| 9  |                  |                      | exposures and potential confounders. Give information        |          |
| 10 |                  |                      | separately for exposed and unexposed groups if               |          |
| 11 |                  |                      | applicable.                                                  |          |
| 12 |                  |                      |                                                              |          |
| 13 |                  |                      |                                                              |          |
| 14 |                  |                      |                                                              |          |
| 15 |                  |                      |                                                              |          |
| 16 |                  |                      |                                                              |          |
| 17 |                  |                      |                                                              |          |
| 18 |                  |                      |                                                              |          |
| 19 | Descriptive data | <a href="#">#14b</a> | Indicate number of participants with missing data for        | Table 1  |
| 20 |                  |                      | each variable of interest                                    |          |
| 21 |                  |                      |                                                              |          |
| 22 |                  |                      |                                                              |          |
| 23 |                  |                      |                                                              |          |
| 24 |                  |                      |                                                              |          |
| 25 | Outcome data     | <a href="#">#15</a>  | Report numbers of outcome events or summary                  | Table 3  |
| 26 |                  |                      | measures. Give information separately for exposed and        |          |
| 27 |                  |                      | unexposed groups if applicable.                              |          |
| 28 |                  |                      |                                                              |          |
| 29 |                  |                      |                                                              |          |
| 30 |                  |                      |                                                              |          |
| 31 |                  |                      |                                                              |          |
| 32 | Main results     | <a href="#">#16a</a> | Give unadjusted estimates and, if applicable,                | NA       |
| 33 |                  |                      | confounder-adjusted estimates and their precision (eg,       |          |
| 34 |                  |                      | 95% confidence interval). Make clear which confounders       |          |
| 35 |                  |                      | were adjusted for and why they were included                 |          |
| 36 |                  |                      |                                                              |          |
| 37 |                  |                      |                                                              |          |
| 38 |                  |                      |                                                              |          |
| 39 |                  |                      |                                                              |          |
| 40 |                  |                      |                                                              |          |
| 41 |                  |                      |                                                              |          |
| 42 | Main results     | <a href="#">#16b</a> | Report category boundaries when continuous variables         | NA       |
| 43 |                  |                      | were categorized                                             |          |
| 44 |                  |                      |                                                              |          |
| 45 |                  |                      |                                                              |          |
| 46 |                  |                      |                                                              |          |
| 47 |                  |                      |                                                              |          |
| 48 | Main results     | <a href="#">#16c</a> | If relevant, consider translating estimates of relative risk | NA       |
| 49 |                  |                      | into absolute risk for a meaningful time period              |          |
| 50 |                  |                      |                                                              |          |
| 51 |                  |                      |                                                              |          |
| 52 |                  |                      |                                                              |          |
| 53 | Other analyses   | <a href="#">#17</a>  | Report other analyses done—e.g., analyses of                 | NA       |
| 54 |                  |                      | subgroups and interactions, and sensitivity analyses         |          |
| 55 |                  |                      |                                                              |          |
| 56 |                  |                      |                                                              |          |
| 57 |                  |                      |                                                              |          |
| 58 |                  |                      |                                                              |          |
| 59 |                  |                      |                                                              |          |
| 60 |                  |                      |                                                              |          |

1 **Discussion**

2

3

4 Key results [#18](#) Summarise key results with reference to study objectives 16 - 18

5

6

7

8

9

10 Limitations [#19](#) Discuss limitations of the study, taking into account sources of potential bias or imprecision. Discuss both direction and magnitude of any potential bias. 18 - 20

11

12

13

14

15

16

17 Interpretation [#20](#) Give a cautious overall interpretation considering objectives, limitations, multiplicity of analyses, results from similar studies, and other relevant evidence. 19 – 20, appendices 6, 7

18

19

20

21

22

23

24

25 Generalisability [#21](#) Discuss the generalisability (external validity) of the study results 21 - 22

26

27

28

29

30 **Other Information**

31

32

33 Funding [#22](#) Give the source of funding and the role of the funders for the present study and, if applicable, for the original study on which the present article is based NA

34

35

36

37

38

39

40

41 None The STROBE checklist is distributed under the terms of the Creative Commons Attribution  
 42 License CC-BY. This checklist can be completed online using <https://www.goodreports.org/>, a tool  
 43 made by the [EQUATOR Network](#) in collaboration with [Penelope.ai](#)

44

45

46

47

48

49

50

51

52

53

54

55

56

57

58

59

60
