# Supplementary material for: Disease burden of diabetes, diabetic retinopathy and their future projections in the UK: cross-sectional analyses of a primary care database
Source: PubMed Central journal article supplement — BMJ Open. 2021 Jul 12;11(7):e050058. doi: 10.1136/bmjopen-2021-050058 (PMC8276304; doi:10.1136/bmjopen-2021-050058), 2021-07-12
Supplement: bmjopen-2021-050058supp001.pdf [file bmjopen-2021-050058supp001.pdf]

## Appendix 1: 7 Step Process of Read codes selection methods

Read codes cover clinical features, diagnosis, procedures, some drugs and investigations (1). Ones used in IMRD consist of 7 characters. They have a hierarchy with more specific ones down the order. This was done in collaboration with Jhot Chandan, a fellow doctoral researcher and my supervisor Krishnarajah Nirantharakumar (Institute of Applied Health Research)

1. The Read code database (MsAccess, MsExcel) is divided into two main columns: A Medcode column with unique 8 character codes for each condition and a description column. Both were used.
2. We developed a list of key search terms for the read codes of interest. These were searched for in the description column. Appendix below provides a list of key search words.
3. Results from the key word search were used to identify the main stem codes where the Read codes of interest belong to.
4. The Next step involved searching the MedCode column for the main stem codes to pick out codes that were otherwise missed on searching the description column.
5. We then also conducted an online search of published articles that have published similar Read Codes (2, 3).
6. Once collected, they were split into possible, probable and definite. There was deliberation between clinicians in the THINKing group to achieve these three lists.
7. They were then hand over to a group of data scientists within the THINKing group who split them into various files following epidemiological principles and saved them in CSV files database.

**References:**

1. Health I. THIN Data Guide for Researchers. 2017(Version 3):108.
2. Mathur R, Bhaskaran K, Edwards E, Lee H, Chaturvedi N, Smeeth L, et al. Population trends in the 10-year incidence and prevalence of diabetic retinopathy in the UK: a cohort study in the Clinical Practice Research Datalink 2004-2014. *BMJ open*. 2017;7(2):e014444.
3. McEwan P, Bennett H, Ward T, Bergenheim K. Refitting of the UKPDS 68 risk equations to contemporary routine clinical practice data in the UK. *Pharmacoeconomics*. 2015;33(2):149-61.

## Appendix 2: Search Terms for diabetic Retinopathy

| Keywords for identifying diabetic retinopathy in the Read Codes Dictionary                                                                                                                                                                                                    |
|-------------------------------------------------------------------------------------------------------------------------------------------------------------------------------------------------------------------------------------------------------------------------------|
| *O/E* or *PHOTOGRAPHY* or *RETINAL* or *SCR* and *HAEMORRHAGES* or *EXUDATE* or *MICROANEURYSMS* or *INTRARETINAL MICROVASCULAR ANAOMALY* or *ABNORMALITY*                                                                                                                    |
| *RETINA* or *FUNDUS* or *MACULAR* or *VITREOUS* and *LASER" or *PHOTOCOAGULATION* or *INTRA-VITREAL INJECTIONS* or *INJECTIONS* or *RANIBIZUMAB* or *BIVACIZUMAB* or *AFLIBERCEPT* or *TRIAMCINOLON* or *ILEUVIEN* or *DEXAMETHOSON*                                          |
| *RETINOPATHY* or *FUNDOSCOPY* or *SEEN or *RETINAL SCR* or *RETINOSCOPY* or *SLIT LAMP* or *DIABETIC EYE* or *EXAMINATION OF RETINA* or *RETINA and OTHER PARTS OF EYE OPERATIONS* or *VITRECTOMY* or *MACULOPATHY* or *BACKGROUND* or *PRE PROLIFERATIVE* or *PROLIFERATIVE* |
| *BLIND" or *PARTIAL SIGHTED" or **SIGHT IMPAIRMENT" or *VISUAL IMPAIRMENT" or *VISUAL FAILURE"                                                                                                                                                                                |

## Appendix 3: Read Codes

| Code                                               | Description                                                       | Status   |
|----------------------------------------------------|-------------------------------------------------------------------|----------|
| <b>No Retinopathy (ROMO)</b>                       |                                                                   |          |
| 2BBD.00                                            | O/E - Right retina normal                                         | Probable |
| 2BBJ.00                                            | O/E - no right diabetic retinopathy                               | Definite |
| 2BB1.00                                            | O/E - retina normal                                               | Probable |
| 2BBI.00                                            | O/E - no retinopathy                                              | Definite |
| 3128000                                            | Fundoscopy normal                                                 | Probable |
| 3128200                                            | Dilated fundoscopy normal                                         | Probable |
| 2BBM.00                                            | O/E - diabetic maculopathy absent both eyes                       | Possible |
| <b>Background Retinopathy (R1)</b>                 |                                                                   |          |
| 2BBP.00                                            | O/E - right eye background diabetic retinopathy                   | Definite |
| 2BBQ.00                                            | O/E - left eye background diabetic retinopathy                    | Definite |
| F420000                                            | Background diabetic retinopathy                                   | Definite |
| F421.00                                            | Other background retinopathy                                      | Definite |
| F421000                                            | Unspecified background retinopathy                                | Definite |
| F421z00                                            | Other background retinopathy NOS                                  | Definite |
| 2BB4.00                                            | O/E - retinal microaneurysms                                      | Definite |
| 2BBa.00                                            | O/E- non-referable retinopathy                                    | Probable |
| <b>Pre proliferative Diabetic Retinopathy (R2)</b> |                                                                   |          |
| F420200                                            | Pre proliferative diabetic retinopathy                            | Definite |
| 2BBR.00                                            | O/E - right eye pre proliferative diabetic retinopathy            | Definite |
| 2BBS.00                                            | O/E - left eye pre proliferative diabetic retinopathy             | Definite |
| F420800                                            | High risk non proliferative diabetic retinopathy                  | Definite |
| <b>Proliferative Diabetic Retinopathy (R3)</b>     |                                                                   |          |
| 2BBk.00                                            | O/E - right eye stable treated proliferative diabetic retinopathy | Definite |
| 2BBI.00                                            | O/E - left eye stable treated proliferative diabetic retinopathy  | Definite |
| F420100                                            | Proliferative diabetic retinopathy                                | Definite |
| F420700                                            | High risk proliferative diabetic retinopathy                      | Definite |
| F422z00                                            | Proliferative retinopathy NOS                                     | Definite |
| F422.00                                            | Other proliferative retinopathy                                   | Definite |
| FyuF700                                            | [X]Other proliferative retinopathy                                | Definite |
| 2BBT.00                                            | O/E - right eye proliferative diabetic retinopathy                | Definite |
| 2BBV.00                                            | O/E - left eye proliferative diabetic retinopathy                 | Definite |
| 7272500                                            | Panretinal laser photocoagulation to lesion of retina NEC         | Definite |
| 7272800                                            | Panretinal laser photocoagulation to lesion of retina             | Definite |
| 2BB7.00                                            | O/E - retinal vascular proliferative                              | Probable |
| 2BB8.00                                            | O/E - vitreous haemorrhages                                       | Probable |
| 7276                                               | Pan retinal photocoagulation for diabetes                         | Definite |
| F420500                                            | Advanced diabetic retinal disease                                 | Possible |
| F422y00                                            | Other specified other proliferative retinopathy                   | Definite |

|                                            |                                                          |          |
|--------------------------------------------|----------------------------------------------------------|----------|
| F4K2800                                    | Vitreous haemorrhage                                     | Probable |
| FyuH400                                    | [X]Vitreous haemorrhage in diseases classified elsewhere | Probable |
| 2BB8.00                                    | O/E - vitreous haemorrhages                              | Probable |
| <b>Diabetic Maculopathy (M1)</b>           |                                                          |          |
| 2BBL.00                                    | O/E - Diabetic maculopathy present both eyes             | Definite |
| 2BBm.00                                    | O/E - right eye clinically significant macular oedema    | Definite |
| 2BBn.00                                    | O/E - left eye clinically significant macular oedema     | Definite |
| 2BBW.00                                    | O/E - right eye diabetic maculopathy                     | Definite |
| 2BBX.00                                    | O/E - left eye diabetic maculopathy                      | Definite |
| F425900                                    | Maculopathy                                              | Definite |
| F42y900                                    | Macular oedema                                           | Definite |
| C10EP00                                    | Type 1 diabetes mellitus with exudative maculopathy      | Definite |
| C10EP11                                    | Type I diabetes mellitus with exudative maculopathy      | Definite |
| C10FQ00                                    | Type 2 diabetes mellitus with exudative maculopathy      | Definite |
| C10FQ11                                    | Type II diabetes mellitus with exudative maculopathy     | Definite |
| F420300                                    | Advanced diabetic maculopathy                            | Definite |
| 7272900                                    | Focal laser photocoagulation of retina                   | Probable |
| F420400                                    | Diabetic maculopathy                                     | Definite |
| <b>Referrable Retinopathy (R2, R3, M1)</b> |                                                          |          |
| 2BBY.00                                    | O/E - referable retinopathy                              | Definite |
| 2BBo.00                                    | O/E - sight threatening diabetic retinopathy             | Definite |
| <b>Advanced diabetic retinal disease</b>   |                                                          |          |
| F420500                                    | Advanced diabetic retinal disease                        | Definite |

| Code                    | Description                                                       | Status   |
|-------------------------|-------------------------------------------------------------------|----------|
| <b>Laser Procedures</b> |                                                                   |          |
| 7276                    | Pan retinal photocoagulation for diabetes                         | Definite |
| 7272012                 | Photocoagulation of the retina NEC                                | Definite |
| 7272013                 | Laser therapy lesion of retina                                    | Definite |
| 7272300                 | Laser destruction of lesion of retina                             | Definite |
| 7272500                 | Pan retinal laser photocoagulation to lesion of retina NEC        | Definite |
| 7272600                 | Laser photocoagulation to lesion of retina NEC                    | Definite |
| 7272800                 | Pan retinal laser photocoagulation to lesion of retina            | Definite |
| 7272900                 | Focal laser photocoagulation of retina                            | Definite |
| 2BBk.00                 | O/E - right eye stable treated proliferative diabetic retinopathy | Definite |
| 2BBi.00                 | O/E - left eye stable treated proliferative diabetic retinopathy  | Definite |
| 2BBO.00                 | O/E - Laser photocoagulation scars                                | Definite |
| 5B4..11                 | Retinal laser therapy                                             | Definite |
| Z6F..11                 | Laser therapy                                                     | Definite |

|                                                      |                                                                 |          |
|------------------------------------------------------|-----------------------------------------------------------------|----------|
| 5B42.00                                              | Laser therapy - retinal lesion                                  | Definite |
| <b>Vitreous/ Peribulbar procedures / haemorrhage</b> |                                                                 |          |
| 7270D00                                              | Injection of Ranibizumab into vitreous body                     | Definite |
| 7270z00                                              | Operation on vitreous body NOS                                  | Definite |
| 7270300                                              | Injection into vitreous body NEC                                | Definite |
| 7274800                                              | Injection of therapeutic substance around the eye               | Possible |
| 727C200                                              | Injection therapeutic substance posterior segment of eye<br>NEC | Definite |
| 7270D00                                              | Injection of Ranibizumab into vitreous body                     | Definite |
| 7L19E00                                              | Injection of triamcinolone                                      | Probable |
| 727C100                                              | Injection of steroid into posterior segment of eye              | Definite |
| 7270200                                              | Injection of vitreous substitute into vitreous body             | Definite |
| 7277600                                              | Injection of therapeutic substance into macula                  | Definite |
| 7270C00                                              | Injection of vitreous substitute into vitreous body NEC         | Definite |
| 727C100                                              | Injection of steroid into posterior segment of eye              | Definite |
| 7270400                                              | Pars plana vitrectomy                                           | Definite |
| 727Cy00                                              | Other specified operations on posterior segment of eye          | Probable |
| 727Cz00                                              | Operations on posterior segment of eye NOS                      | Probable |
| 7273000                                              | Epiretinal dissection                                           | Possible |
| 727C000                                              | Insertion sustained release device posterior segment of<br>eye  | Definite |
| 7270y00                                              | Other specified operation on vitreous body                      | Definite |
| 7270800                                              | Internal tamponade of retina using liquid                       | Possible |
| 7270900                                              | Internal tamponade of retina using oil                          | Possible |
| 7270A00                                              | Removal of internal tamponade agent from vitreous body          | Possible |
| 7270411                                              | Vitrectomy using pars plana approach                            | Probable |
| 7270500                                              | Air/gas exchange of vitreous                                    | Possible |
| 7270600                                              | Internal tamponade of retina using gas                          | Probable |
| 7270200                                              | Injection of vitreous substitute into vitreous body             | Probable |
| 7270300                                              | Injection into vitreous body NEC                                | Definite |
| 7270400                                              | Pars plana vitrectomy                                           | Definite |
| 7270                                                 | Operations on vitreous body                                     | Probable |
| 7270100                                              | Extirpation of vitreous body NEC                                | Probable |
| F4K2800                                              | Vitreous haemorrhage                                            | Definite |
| FyuH400                                              | [X]Vitreous haemorrhage in diseases classified elsewhere        | Definite |
| 2BB8.00                                              | O/E - vitreous haemorrhages                                     | Definite |
| <b>Vision loss / blindness</b>                       |                                                                 |          |
| ZV52200                                              | [V]Fitting or adjustment of artificial eye                      | Probable |
| ZV43000                                              | [V]Has artificial eye globe                                     | Probable |
| ZV43100                                              | [V]Has artificial eye lens                                      | Possible |
| FyuL.00                                              | [X]Visual disturbances and blindness                            | Definite |
| F49z.11                                              | Acquired blindness                                              | Definite |
| F490900                                              | Acquired blindness, both eyes                                   | Definite |
| F495A00                                              | Acquired blindness, one eye                                     | Definite |

|         |                                                             |          |
|---------|-------------------------------------------------------------|----------|
| F491.00 | Better eye: low vision, Lesser eye: profound VI             | Definite |
| F491500 | Better eye: moderate VI, Lesser eye: blind, unspecified     | Definite |
| F492300 | Better eye: moderate VI, Lesser eye: low vision unspecified | Definite |
| F492500 | Better eye: moderate VI, Lesser eye: moderate VI            | Definite |
| F491700 | Better eye: moderate VI, Lesser eye: near total VI          | Definite |
| F491800 | Better eye: moderate VI, Lesser eye: profound VI            | Definite |
| F492400 | Better eye: moderate VI, Lesser eye: severe VI              | Definite |
| F491600 | Better eye: moderate VI, Lesser eye: total VI               | Definite |
| F490400 | Better eye: near total VI, Lesser eye: near total VI        | Definite |
| F490300 | Better eye: near total VI, Lesser eye: total VI             | Definite |
| F490200 | Better eye: near total VI, Lesser eye: unspecified          | Definite |
| F490700 | Better eye: profound VI, Lesser eye: near total VI          | Definite |
| F490800 | Better eye: profound VI, Lesser eye: profound VI            | Definite |
| F490600 | Better eye: profound VI, Lesser eye: total VI               | Definite |
| F490500 | Better eye: profound VI, Lesser eye: unspecified            | Definite |
| F491100 | Better eye: severe VI, Lesser eye: blind, unspecified       | Definite |
| F492100 | Better eye: severe VI, Lesser eye: low vision unspecified   | Definite |
| F491300 | Better eye: severe VI, Lesser eye: near total VI            | Definite |
| F491400 | Better eye: severe VI, Lesser eye: profound VI              | Definite |
| F492200 | Better eye: severe VI, Lesser eye: severe VI                | Definite |
| F491200 | Better eye: severe VI, Lesser eye: total VI                 | Definite |
| 8F62.00 | Blind lead dog rehabilitation                               | Definite |
| 8F6..11 | Blind rehabilitation                                        | Definite |
| 8F61.00 | Blind rehabilitation                                        | Definite |
| ZN56800 | Blind telephone user                                        | Definite |
| F49..00 | Blindness and low vision                                    | Definite |
| F490z00 | Blindness both eyes NOS                                     | Definite |
| F490.00 | Blindness, both eyes                                        | Definite |
| F49A.00 | Blindness, monocular                                        | Definite |
| F495000 | Blindness, one eye, unspecified                             | Definite |
| F490100 | Both eyes total visual impairment                           | Definite |
| 668C.00 | Certificate of vision impairment                            | Definite |
| Fy1..00 | Combined visual and hearing impairment                      | Definite |
| Fy1..12 | Deafblind                                                   | Definite |
| ZN56A00 | Deaf-blind telephone user                                   | Definite |
| Fy1..11 | Dual sensory impairment - deafblind                         | Definite |
| 9m08.00 | Exclu diab ret screen as blind                              | Definite |
| 2BBr.00 | Impair vision due diab retinop                              | Definite |
| F49..11 | Impaired vision                                             | Definite |
| ZK74.00 | Issue of local authority blind registration                 | Definite |
| F494.00 | Legal blindness USA                                         | Definite |
| F496500 | Lesser eye: moderate VI, Better eye: near normal vision     | Definite |
| F496600 | Lesser eye: moderate VI, Better eye: normal vision          | Definite |

|         |                                                              |          |
|---------|--------------------------------------------------------------|----------|
| F496400 | Lesser eye: moderate VI, Better eye: unspecified             | Definite |
| F495500 | Lesser eye: near total VI, Better eye: near normal vision    | Definite |
| F495600 | Lesser eye: near total VI, Better eye: normal vision         | Definite |
| F495400 | Lesser eye: near total VI, Better eye: unspecified           | Definite |
| F495800 | Lesser eye: profound VI, Better eye: near normal vision      | Definite |
| F495900 | Lesser eye: profound VI, Better eye: normal vision           | Definite |
| F495700 | Lesser eye: profound VI, Better eye: unspecified             | Definite |
| F496200 | Lesser eye: severe VI, Better eye: near normal vision        | Definite |
| F496300 | Lesser eye: severe VI, Better eye: normal vision             | Definite |
| F496100 | Lesser eye: severe VI, Better eye: unspecified               | Definite |
| F495200 | Lesser eye: total VI, Better eye: near normal vision         | Definite |
| F495300 | Lesser eye: total VI, Better eye: normal vision              | Definite |
| F495100 | Lesser eye: total visual impairment, Better eye: unspecified | Definite |
| F49..12 | Low vision                                                   | Definite |
| F492.00 | Low vision, both eyes                                        | Definite |
| F492z00 | Low vision, both eyes NOS                                    | Definite |
| F492000 | Low vision, both eyes unspecified                            | Definite |
| F496.00 | Low vision, one eye                                          | Definite |
| F496z00 | Low vision, one eye NOS                                      | Definite |
| F496000 | Low vision, one eye, unspecified                             | Definite |
| F498.00 | Moderate visual impairment, binocular                        | Definite |
| F49C.00 | Moderate visual impairment, monocular                        | Definite |
| 2B7A.11 | O/E - blind L-eye                                            | Definite |
| 2B6A.11 | O/E - blind R-eye                                            | Definite |
| 22E6.11 | O/E - false eye                                              | Definite |
| 22E6.00 | O/E - glass (prosthetic) eye                                 | Definite |
| 22E6.12 | O/E - glass eye                                              | Definite |
| 22EF.00 | O/E - has one eye                                            | Definite |
| 2B7B.00 | O/E - L-eye completely blind                                 | Definite |
| 2B7C.00 | O/E - L-eye sees hand movements                              | Definite |
| 2B7T.00 | O/E - L-eye visual acuity (corrected) 1/60                   | Definite |
| 2B7V.00 | O/E - L-eye visual acuity (corrected) 2/60                   | Definite |
| 2B7W.00 | O/E - L-eye visual acuity (corrected) 4/60                   | Definite |
| 2B7X.00 | O/E - L-eye visual acuity (corrected) 5/60                   | Definite |
| 2B7S.00 | O/E - pinhole L-eye completely blind                         | Definite |
| 2B7Q.00 | O/E - pinhole L-eye counts fingers only                      | Definite |
| 2B7R.00 | O/E - pinhole L-eye perceives light only                     | Definite |
| 2B7P.00 | O/E - pinhole L-eye sees hand movements                      | Definite |
| 2B6S.00 | O/E - pinhole R-eye completely blind                         | Definite |
| 2B6Q.00 | O/E - pinhole R-eye counts fingers only                      | Definite |
| 2B6R.00 | O/E - pinhole R-eye perceives light only                     | Definite |
| 2B6P.00 | O/E - pinhole R-eye sees hand movements                      | Definite |
| 2B7L.00 | O/E - pinhole visual acuity L-eye=6/60                       | Definite |



|         |                                                             |          |
|---------|-------------------------------------------------------------|----------|
| 2B6L.00 | O/E - pinhole visual acuity R-eye=6/60                      | Definite |
| 22E6.13 | O/E - prosthetic eye                                        | Definite |
| 2B6B.00 | O/E - R-eye completely blind                                | Definite |
| 2B6C.00 | O/E - R-eye sees hand movements                             | Definite |
| 2B6T.00 | O/E - R-eye visual acuity (corrected) 1/60                  | Definite |
| 2B6V.00 | O/E - R-eye visual acuity (corrected) 2/60                  | Definite |
| 2B6W.00 | O/E - R-eye visual acuity (corrected) 4/60                  | Definite |
| 2B6X.00 | O/E - R-eye visual acuity (corrected) 5/60                  | Definite |
| 2B7E.00 | O/E - visual acuity L-eye=3/60                              | Definite |
| 2B78.00 | O/E - visual acuity L-eye=6/60                              | Definite |
| 2B6E.00 | O/E - visual acuity R-eye=3/60                              | Definite |
| 2B68.00 | O/E - visual acuity R-eye=6/60                              | Definite |
| 2B79.00 | O/E -L-eye counts fingers only                              | Definite |
| 2B69.00 | O/E -R-eye counts fingers only                              | Definite |
| 2B7A.00 | O/E-L-eye perceives light only                              | Definite |
| 2B6A.00 | O/E-R-eye perceives light only                              | Definite |
| F491000 | One eye blind, one eye low vision                           | Definite |
| F491z00 | One eye blind, one eye low vision NOS                       | Definite |
| Z9E2.00 | Optical low vision aid provision                            | Definite |
| F49..13 | Partial sight                                               | Definite |
| F495z00 | Profound impairment one eye NOS                             | Definite |
| F495.00 | Profound impairment, one eye                                | Definite |
| Z96..00 | Provision for visual and hearing impairment                 | Definite |
| Z9E5400 | Provision of ancillary low vision aid                       | Definite |
| Z9E1100 | Provision of artificial eye                                 | Definite |
| Z962.00 | Provision of communicator for visual and hearing impairment | Definite |
| Z9E5100 | Provision of electronic low vision aid                      | Definite |
| Z961.00 | Provision of guide help for visual and hearing impairment   | Definite |
| Z9E3200 | Provision of low vision hand magnifier                      | Definite |
| Z9E3400 | Provision of low vision headband magnifier                  | Definite |
| Z9E3300 | Provision of low vision stand magnifier                     | Definite |
| Z9E3100 | Provision of magnifier low vision aid - near                | Definite |
| Z9E5.00 | Provision of non-optical low vision aid                     | Definite |
| Z9E4.00 | Provision of optical low vision aid - distance              | Definite |
| Z9E3.00 | Provision of optical low vision aid - near                  | Definite |
| Z9E1200 | Provision of removable artificial eye                       | Definite |
| Z9E3500 | Provision of spectacle low vision aid - near                | Definite |
| 8HIE.00 | Referral to visual impairment multidisciplinary team        | Definite |
| 6689    | Registered blind                                            | Definite |
| 6688.11 | Registered partially blind                                  | Definite |
| 6688    | Registered partially sighted                                | Definite |
| 6689.11 | Registered severely sight impaired                          | Definite |
| 668D.00 | Registered sight impaired                                   | Definite |

|         |                                                     |          |
|---------|-----------------------------------------------------|----------|
| 8D36.00 | Removable artificial eye                            | Definite |
| 9Nfb.00 | Requires deafblind block alphabet interpreter       | Definite |
| 9NfB.00 | Requires deafblind communicator guide               | Definite |
| 9Nfc.00 | Requires deafblind haptic communication interpreter | Definite |
| 9Nfa.00 | Requires deafblind manual alphabet interpreter      | Definite |
| F497.00 | Severe visual impairment, binocular                 | Definite |
| F49B.00 | Severe visual impairment, monocular                 | Definite |
| F49..14 | Sight impaired                                      | Definite |
| F490000 | Unspecified blindness both eyes                     | Definite |
| 1a00000 | Uses guide dog for the blind                        | Definite |
| F49D.00 | Visual impairment                                   | Definite |
| F493.00 | Visual loss, both eyes unqualified                  | Definite |
| F49y.00 | Visual loss, one eye, unqualified                   | Definite |
| F404200 | Blind hypertensive eye                              | Definite |
| F404100 | Blind hypotensive eye                               | Definite |
| Z9E3900 | Near low vision aid - clip-on spectacle magnifier   | Definite |
| Z9E3C00 | Near low vision aid - clip-on spectacle telescope   | Definite |
| Z9E3D00 | Near low vision aid - extra cap for telescope       | Definite |
| Z9E3800 | Near low vision aid - integral spectacle magnifier  | Definite |
| Z9E3B00 | Near low vision aid - integral spectacle telescope  | Definite |
| 9NID.00 | Seen by visual impairment teacher                   | Definite |
| 1B75.00 | Loss of vision, Severe visual loss                  | Definite |
| 1B77.00 | Deteriorating vision, Severe visual loss            | Definite |

### Unclassifiable

| Code    | Description                                                   |
|---------|---------------------------------------------------------------|
| 2BB5.00 | O/E - retinal haemorrhages                                    |
| 2BB6.00 | O/E - retinal exudates                                        |
| 2BBF.00 | Retinal abnormality-diabetes related                          |
| 2BBr.00 | Impaired vision due diab retinop                              |
| C105.00 | Diabetes mellitus with ophthalmic manifestation               |
| C105000 | Diabetes mellitus, juvenile type, + ophthalmic manifestation  |
| C105100 | Diabetes mellitus, adult onset, + ophthalmic manifestation    |
| C105y00 | Other specified diabetes mellitus with ophthalmic complicatn  |
| C105z00 | Diabetes mellitus NOS with ophthalmic manifestation           |
| C108100 | Insulin-dependent diabetes mellitus with ophthalmic comps     |
| C108111 | Type I diabetes mellitus with ophthalmic complications        |
| C108112 | Type 1 diabetes mellitus with ophthalmic complications        |
| C108700 | Insulin dependent diabetes mellitus with retinopathy          |
| C108711 | Type I diabetes mellitus with retinopathy                     |
| C108712 | Type 1 diabetes mellitus with retinopathy                     |
| C109100 | Non-insulin-dependent diabetes mellitus with ophthalmic comps |

|         |                                                              |
|---------|--------------------------------------------------------------|
| C109111 | Type II diabetes mellitus with ophthalmic complications      |
| C109112 | Type 2 diabetes mellitus with ophthalmic complications       |
| C109600 | Non-insulin-dependent diabetes mellitus with retinopathy     |
| C109611 | Type II diabetes mellitus with retinopathy                   |
| C109612 | Type 2 diabetes mellitus with retinopathy                    |
| C10A300 | Malnutrit-related diabetes mellitus wth ophthalmic complicat |
| C10E100 | Type 1 diabetes mellitus with ophthalmic complications       |
| C10E111 | Type I diabetes mellitus with ophthalmic complications       |
| C10E112 | Insulin-dependent diabetes mellitus with ophthalmic comps    |
| C10E700 | Type 1 diabetes mellitus with retinopathy                    |
| C10E711 | Type I diabetes mellitus with retinopathy                    |
| C10E712 | Insulin dependent diabetes mellitus with retinopathy         |
| C10F600 | Type 2 diabetes mellitus with retinopathy                    |
| C10F611 | Type II diabetes mellitus with retinopathy                   |
| F420.00 | Diabetic retinopathy                                         |
| F420600 | Non proliferative diabetic retinopathy                       |
| F420z00 | Diabetic retinopathy NOS                                     |
| F421.11 | Microvascular retinal changes                                |
| 2BB5.00 | O/E - retinal haemorrhages                                   |
| 2BBM.00 | O/E - diabetic maculopathy absent both eyes                  |

**Appendix 4: Summary of Prevalence Trends 1998 to 2018**

| Decade                     | Prevalence estimate at the start of the decade | Prevalence estimate at the end of the decade | Percentage increase in prevalence within the decade | Percentage increase in prevalence between the decades |
|----------------------------|------------------------------------------------|----------------------------------------------|-----------------------------------------------------|-------------------------------------------------------|
| STR in T1DM in two decades |                                                |                                              |                                                     |                                                       |
| 1998 to 2007               | 8.15                                           | 17.57                                        | 216%                                                |                                                       |
| 2009 to 2018               | 20.54                                          | 30.22                                        | 147%                                                | 371%                                                  |
| STR in T2DM in two decades |                                                |                                              |                                                     |                                                       |
| 1998 to 2007               | 4.36                                           | 8.1                                          | 186%                                                |                                                       |
| 2009 to 2018               | 9.01                                           | 11.15                                        | 124%                                                | 256%                                                  |
| DR in T1DM in two decades  |                                                |                                              |                                                     |                                                       |
| 1998 to 2007               | 26.62                                          | 40.32                                        | 151%                                                |                                                       |
| 2009 to 2018               | 45.39                                          | 57.75                                        | 127%                                                | 217%                                                  |
| DR in T2DM in two decades  |                                                |                                              |                                                     |                                                       |
| 1998 to 2007               | 11.53                                          | 20.06                                        | 174%                                                |                                                       |
| 2009 to 2018               | 23.7                                           | 32.64                                        | 138%                                                | 283%                                                  |
| STR in DM in two decades   |                                                |                                              |                                                     |                                                       |
| 1998 to 2007               | 4.87                                           | 8.84                                         | 182%                                                |                                                       |
| 2009 to 2018               | 9.86                                           | 12.48                                        | 127%                                                | 256%                                                  |
| DR in DM in two decades    |                                                |                                              |                                                     |                                                       |
| 1998 to 2007               | 13.57                                          | 21.64                                        | 159%                                                |                                                       |
| 2009 to 2018               | 25.3                                           | 34.39                                        | 136%                                                | 253%                                                  |
| T1DM in two decades        |                                                |                                              |                                                     |                                                       |
| 1998 to 2007               | 0.31%                                          | 0.32%                                        | 104%                                                |                                                       |
| 2009 to 2018               | 0.33%                                          | 0.41%                                        | 123%                                                | 132%                                                  |
| T2DM in two decades        |                                                |                                              |                                                     |                                                       |
| 1998 to 2007               | 1.91%                                          | 3.65%                                        | 191%                                                |                                                       |
| 2009 to 2018               | 4.01%                                          | 5.24%                                        | 131%                                                | 273%                                                  |

## Appendix 5: Future projections

In the four figures below, the grey area is the prediction band (95% confidence interval) and signifies the uncertainty of the estimates.

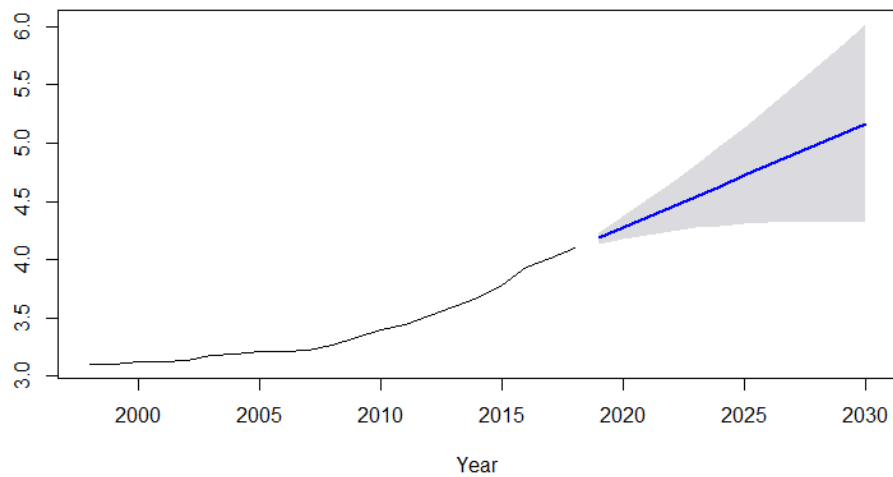

**Figure 1: T1DM Projections / 1000 individuals**

X axis is calendar years and Y axis is prevalence (cases per 1000 individuals general population), starts at 3.0

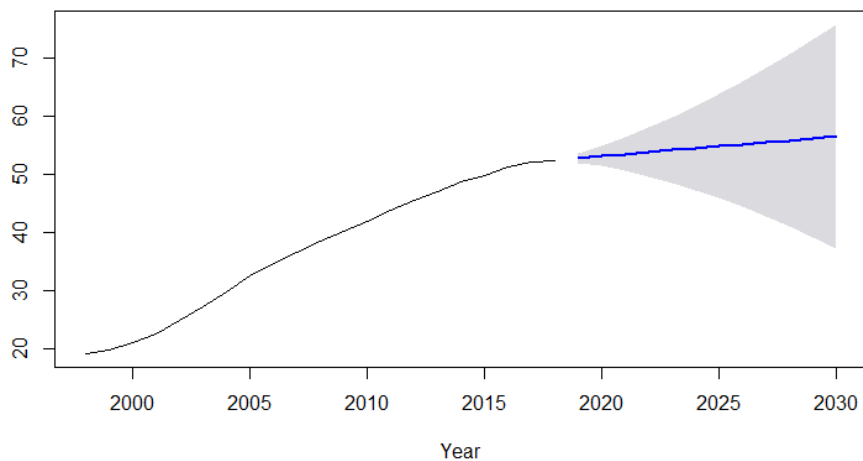

**Figure 2: T2DM Projections / 1000 individuals**

X axis is calendar years and Y axis is prevalence (cases per 1000 individuals general population) starts at 17

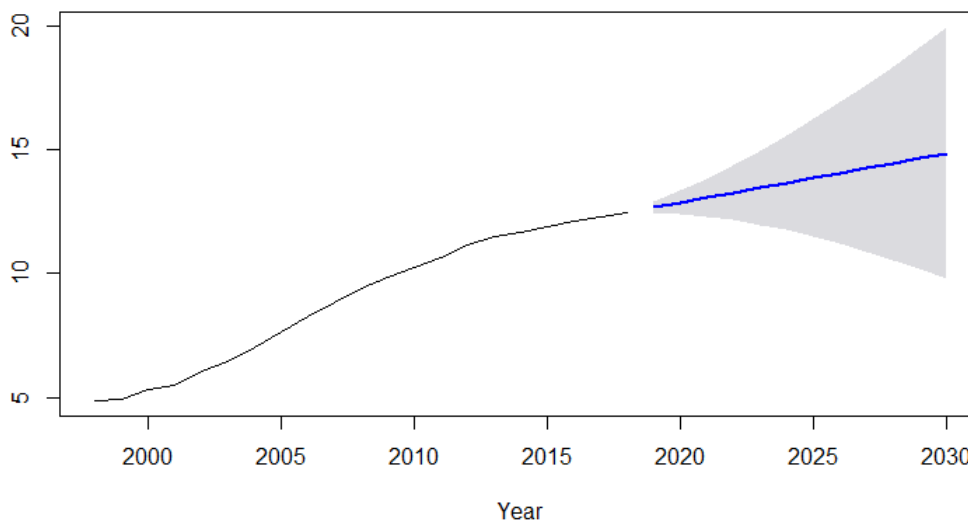

**Figure 3: STR Projections (%)**

X axis is calendar years and Y axis is prevalence (cases per 100 individuals with diabetes) starts at 4

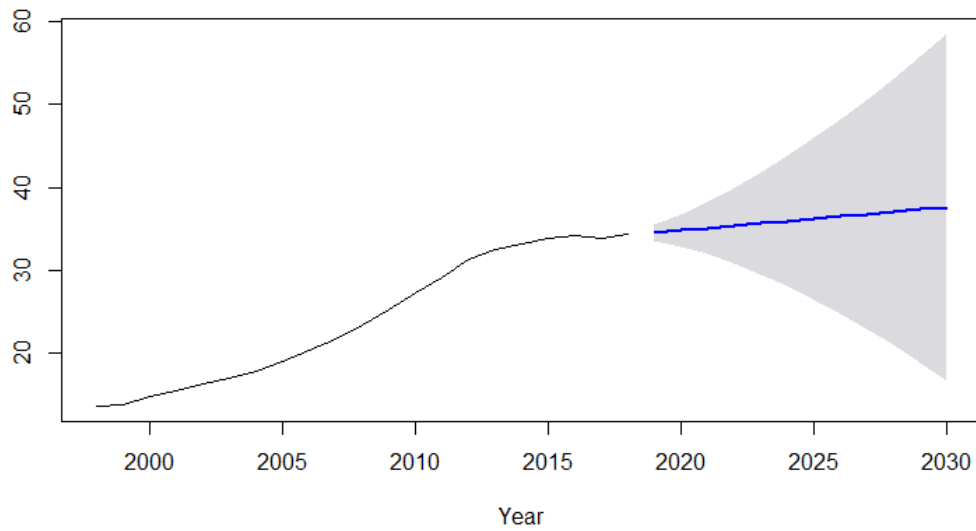

**Figure 4: DR Projections (%)**

X axis is calendar years and Y axis is prevalence (cases per 100 individuals with diabetes), starts at

10

Annual Prevalence Diabetes Mellitus per 1000 Population and Diabetic Retinopathy per 100 diabetic population (95% PI)

| Year | T1DM Forecast |        |         | T2DM Forecast |        |         | DR Forecast |        |         | STR Forecast |        |         |
|------|---------------|--------|---------|---------------|--------|---------|-------------|--------|---------|--------------|--------|---------|
|      | Forecast      | Low 95 | High 95 | Forecast      | Low 95 | High 95 | Forecast    | Low 95 | High 95 | Forecast     | Low 95 | High 95 |
| 2019 | 4.2           | 4.1    | 4.2     | 52.7          | 51.9   | 53.6    | 34.5        | 33.5   | 35.5    | 12.7         | 12.4   | 12.9    |
| 2020 | 4.3           | 4.2    | 4.4     | 53.1          | 51.4   | 54.8    | 34.8        | 32.9   | 36.7    | 12.9         | 12.4   | 13.3    |
| 2021 | 4.4           | 4.2    | 4.5     | 53.4          | 50.6   | 56.3    | 35.1        | 31.9   | 38.2    | 13.1         | 12.3   | 13.8    |
| 2022 | 4.5           | 4.2    | 4.7     | 53.8          | 49.6   | 57.9    | 35.4        | 30.8   | 39.9    | 13.3         | 12.2   | 14.4    |
| 2023 | 4.5           | 4.3    | 4.8     | 54.1          | 48.5   | 59.7    | 35.6        | 29.5   | 41.8    | 13.5         | 12.0   | 15.0    |
| 2024 | 4.6           | 4.3    | 5.0     | 54.4          | 47.2   | 61.6    | 35.9        | 28.1   | 43.8    | 13.7         | 11.8   | 15.6    |
| 2025 | 4.7           | 4.3    | 5.1     | 54.8          | 45.8   | 63.7    | 36.2        | 26.5   | 45.9    | 13.9         | 11.5   | 16.2    |
| 2026 | 4.8           | 4.3    | 5.3     | 55.1          | 44.3   | 65.9    | 36.5        | 24.7   | 48.2    | 14.1         | 11.2   | 16.9    |
| 2027 | 4.9           | 4.3    | 5.5     | 55.4          | 42.7   | 68.2    | 36.8        | 22.9   | 50.6    | 14.3         | 10.9   | 17.6    |
| 2028 | 5.0           | 4.3    | 5.7     | 55.8          | 41.0   | 70.6    | 37.0        | 20.9   | 53.2    | 14.5         | 10.5   | 18.4    |
| 2029 | 5.1           | 4.3    | 5.8     | 56.1          | 39.1   | 73.1    | 37.3        | 18.8   | 55.8    | 14.7         | 10.2   | 19.1    |
| 2030 | 5.2           | 4.3    | 6.0     | 56.4          | 37.2   | 75.7    | 37.6        | 16.7   | 58.5    | 14.9         | 9.8    | 19.9    |



**Appendix 6: Previous prevalence studies compared with IMRD based analysis**

| Publication                        | Population                                                                                                                  | T1DM                                      | T2DM                                                                                           | Any DM                                                                                                              |
|------------------------------------|-----------------------------------------------------------------------------------------------------------------------------|-------------------------------------------|------------------------------------------------------------------------------------------------|---------------------------------------------------------------------------------------------------------------------|
| Younis et al (1)                   | Liverpool diabetic retinopathy screening programme 1991 to 1999 – baseline prevalence at entry into the programme           | Any DR<br>45.7%<br>STED 16.4%<br>PDR 3.7% | Any DR<br>25.3%<br>STED 6.0%<br>PDR 0.5%                                                       |                                                                                                                     |
| Misra et al (2)                    | Norwich Diabetic retinopathy screening programme 2006 with dynamic cohort design with repeated measures                     |                                           |                                                                                                | Any DR 25.6%<br>STDR 0.6%<br>PPDR 4.6%<br>PDR 0.08%<br>Maculopathy 0.44%<br>Referable (R2, R3, M1) retinopathy 4.7% |
| Thomas (3) and Minassian et al (4) | Welsh Diabetic retinopathy screening programme 2005 to 2009 and application to England                                      | Any DR 56.3%<br>STDR 11.2%                | Any DR 30.9%<br>STDR 2.9%                                                                      | Any DR 32.4%<br>STDR 3.4%<br>Diabetic Macular Oedema 7.12%                                                          |
| Looker et al (5)                   | Newly diagnosed type 2 diabetes attending Scottish National screening programme 2005 to 2008. prevalence at first screening |                                           | Any DR 19.3%<br>Referable DR 1.9%<br>PPDR ± any maculopathy 0.4%<br>PDR ± any maculopathy 0.3% |                                                                                                                     |

|                   |                                                       |                                                     |                                                    |                                                    |
|-------------------|-------------------------------------------------------|-----------------------------------------------------|----------------------------------------------------|----------------------------------------------------|
| Mathur et al (6)  | CPRD based UK wide study 2014 - crude prevalence rate | Any DR 54.8%<br>Severe DR 8.1%                      | Any DR 30.6%<br>Severe DR 1.2%                     | Any DR 32.6%<br>Severe DR 1.8%                     |
| The present study | IMRD based cross sectional study - 2017               | Any DR 57.8%<br>STR 30.2%<br>Any maculopathy 19.62% | Any DR 32.6%<br>STR 11.2%<br>Any maculopathy 6.99% | Any DR 34.4%<br>STR 12.3%<br>Any maculopathy 7.86% |

### References:

1. Younis N, Broadbent DM, Harding SP, Vora JR. Prevalence of diabetic eye disease in patients entering a systematic primary care-based eye screening programme. *Diabetic medicine : a journal of the British Diabetic Association*. 2002;19(12):1014-21.
2. Misra A, Bachmann MO, Greenwood RH, Jenkins C, Shaw A, Barakat O, et al. Trends in yield and effects of screening intervals during 17 years of a large UK community-based diabetic retinopathy screening programme. *Diabetic medicine : a journal of the British Diabetic Association*. 2009;26(10):1040-7.
3. Thomas RL, Dunstan FD, Luzio SD, Chowdhury SR, North RV, Hale SL, et al. Prevalence of diabetic retinopathy within a national diabetic retinopathy screening service. *The British journal of ophthalmology*. 2015;99(1):64-8.
4. Minassian DC, Owens DR, Reidy A. Prevalence of diabetic macular oedema and related health and social care resource use in England. *The British journal of ophthalmology*. 2012;96(3):345-9.
5. Looker H, Nyangoma S, Cromie D, Olson J, Leese G, Black M, et al. Diabetic retinopathy at diagnosis of type 2 diabetes in Scotland. *Diabetologia*. 2012;55(9):2335-42.
6. Mathur R, Bhaskaran K, Edwards E, Lee H, Chaturvedi N, Smeeth L, et al. Population trends in the 10-year incidence and prevalence of diabetic retinopathy in the UK: a cohort study in the Clinical Practice Research Datalink 2004-2014. *BMJ open*. 2017;7(2):e014444.

## Appendix 7: Previous publications reporting trends in prevalence rates of DR in the UK compared with IMRD based analysis

| Publication      | Population                                                                                                                      | T1DM                                                                                       | T2DM                                                                                                            | Any DM                                                                                       |
|------------------|---------------------------------------------------------------------------------------------------------------------------------|--------------------------------------------------------------------------------------------|-----------------------------------------------------------------------------------------------------------------|----------------------------------------------------------------------------------------------|
| Misra et al (1)  | Norwich Diabetic retinopathy screening programme 1990 to 2006 (Mostly Type 2) with dynamic cohort design with repeated measures |                                                                                            |                                                                                                                 | All DR prevalence increased from 23.2% to 25.3%<br><br>Referable DR increased from 2 to 4.7% |
| Mathur et al (2) | CPRD based UK wide study population from 2004 to 2014                                                                           | All DR remained stable at 55%<br><br>Severe DR increased from 3.5% in 2004 to 8.0% in 2014 | All DR reduced from 24.6% in 2004 to 23.1% in 2014<br><br>Severe DR increased from 0.3% in 2004 to 0.9% in 2014 | All DR prevalence decreased from 2.6% to 2.2%<br><br>Severe DR remained stable at 0.1%       |
| This study       | IMRD based serial cross-sectional studies 1998 to 2018                                                                          |                                                                                            |                                                                                                                 |                                                                                              |

### References:

1. Misra A, Bachmann MO, Greenwood RH, Jenkins C, Shaw A, Barakat O, et al. Trends in yield and effects of screening intervals during 17 years of a large UK community-based diabetic retinopathy screening programme. *Diabetic medicine : a journal of the British Diabetic Association.* 2009;26(10):1040-7.
2. Mathur R, Bhaskaran K, Edwards E, Lee H, Chaturvedi N, Smeeth L, et al. Population trends in the 10-year incidence and prevalence of diabetic retinopathy in the UK: a cohort study in the Clinical Practice Research Datalink 2004-2014. *BMJ open.* 2017;7(2):e014444.
